# Supplementary material for: TMSOTf-mediated synthesis of skipped dienes through the addition of olefins to imines and semicyclic N,O-acetals
Source: Royal Society of Chemistry journal article supplement (doi:10.1039/d1ob01370j), 2021-01-01
Supplement: d1ob01370j1.pdf [file d1ob01370j1.pdf]

## Supporting Information

### TMSOTf-mediated Synthesis of Skipped Dienes Through the Addition of Olefins to Imines and Semicyclic *N, O*-Acetals

Yi-Man Feng, Xiao-Di Nie, Jian-Ting Sun, Wen-Ke Xu, Bang-Guo Wei\*

*Department of Natural Medicine, School of Pharmacy, Fudan University, 826 Zhangheng Road, Shanghai 201203, China*

E-mail: bgwei1974@fudan.edu.cn (B.-G. Wei)

### Table of Contents

|                                                                                             |         |
|---------------------------------------------------------------------------------------------|---------|
| I. X-Ray Structure for compounds <b>3ea</b> and <b>6aa</b> .....                            | S1-S4   |
| II. Copies of <sup>1</sup> H NMR, <sup>13</sup> C NMR and <sup>19</sup> F NMR Spectrum..... | S5-S78  |
| III. HPLC reports.....                                                                      | S79-S87 |

## I. X-Ray Structure for compounds 3ea and 6aa

**ORTEP drawing of the X-ray crystallographic structure of compound 3ea** (50% probability ellipsoids, **ddz20103** is the original test number for **3ea**):

The single crystal of compound **3ea** was prepared from its solution in petroleum ether by slow evaporation of the solvent (**Table S1**)

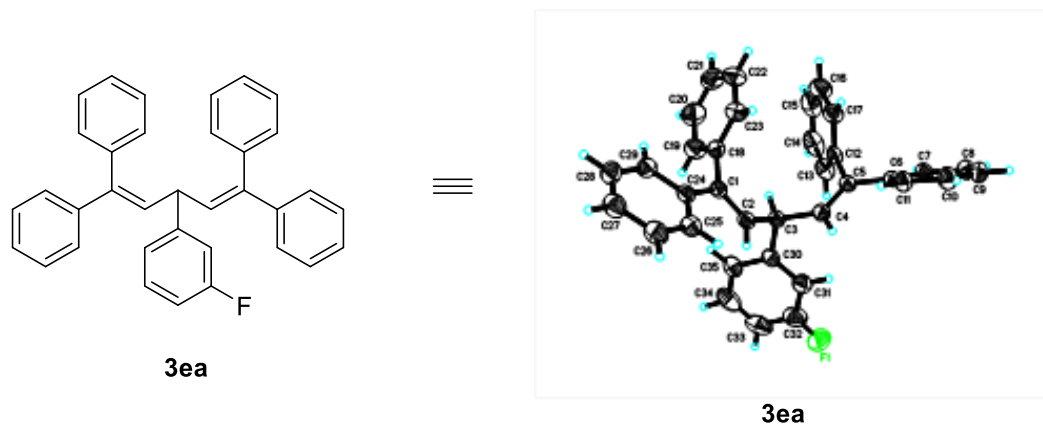

**Table S1.** Crystal data and structure refinement for **3ea**.

|                        |                                                                              |
|------------------------|------------------------------------------------------------------------------|
| Identification code    | <b>3ea</b>                                                                   |
| Empirical formula      | C <sub>35</sub> H <sub>27</sub> F                                            |
| Formula weight         | 466.56                                                                       |
| Temperature            | 293(2) K                                                                     |
| Wavelength             | 0.71073 Å                                                                    |
| Crystal system         | Orthorhombic                                                                 |
| Space group            | P b c a                                                                      |
| Unit cell dimensions   | a = 18.4643(12) Å = 90°.<br>b = 8.6875(6) Å = 90°.<br>c = 32.046(2) Å = 90°. |
| Volume                 | 5140.4(6) Å <sup>3</sup>                                                     |
| Z                      | 8                                                                            |
| Density (calculated)   | 1.206 Mg/m <sup>3</sup>                                                      |
| Absorption coefficient | 0.073 mm <sup>-1</sup>                                                       |
| F(000)                 | 1968                                                                         |

|                                   |                                             |
|-----------------------------------|---------------------------------------------|
| Crystal size                      | 0.180 x 0.110 x 0.070 mm <sup>3</sup>       |
| Theta range for data collection   | 2.546 to 25.494 °                           |
| Index ranges                      | -22<=h<=22, -10<=k<=10, -38<=l<=38          |
| Reflections collected             | 70059                                       |
| Independent reflections           | 4788 [R(int) = 0.0963]                      |
| Completeness to theta = 25.242 °  | 99.9 %                                      |
| Absorption correction             | Semi-empirical from equivalents             |
| Max. and min. transmission        | 0.7456 and 0.6846                           |
| Refinement method                 | Full-matrix least-squares on F <sup>2</sup> |
| Data / restraints / parameters    | 4788 / 0 / 335                              |
| Goodness-of-fit on F <sup>2</sup> | 1.078                                       |
| Final R indices [I>2sigma(I)]     | R1 = 0.0524, wR2 = 0.1000                   |
| R indices (all data)              | R1 = 0.1079, wR2 = 0.1268                   |
| Extinction coefficient            | 0.0036(3)                                   |
| Largest diff. peak and hole       | 0.129 and -0.136 e.Å <sup>-3</sup>          |

CCDC 2090252. For detailed crystallographic data, please refer to the Cambridge Crystallographic Data Centre at <http://ccdc.cam.ac.uk>.

**ORTEP drawing of the X-ray crystallographic structure of compound 6aa** (50% probability ellipsoids, **mo\_dd20131\_0m** is the original test number for **6aa**):

The single crystal of compound **6aa** was prepared from its solution in petroleum ether/ethylacetate (4:1) by slow evaporation of the solvent (**Table S2**)

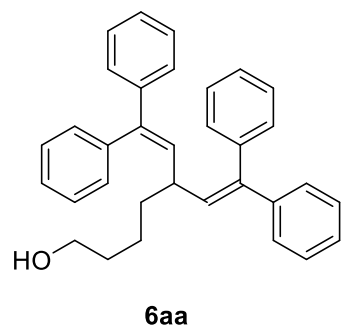

≡

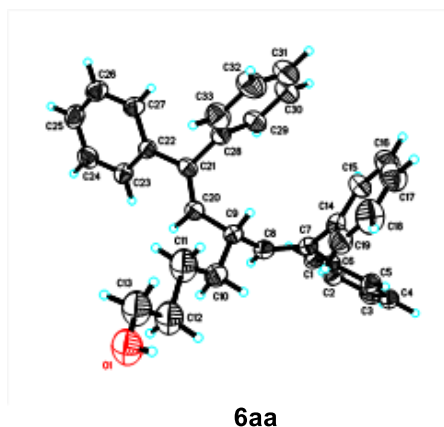

**Table S2.** Crystal data and structure refinement for **6aa**.

|                        |                                   |          |
|------------------------|-----------------------------------|----------|
| Identification code    | <b>6aa</b>                        |          |
| Empirical formula      | C <sub>33</sub> H <sub>32</sub> O |          |
| Formula weight         | 444.58                            |          |
| Temperature            | 293.06 K                          |          |
| Wavelength             | 0.71073 Å                         |          |
| Crystal system         | Orthorhombic                      |          |
| Space group            | P b c n                           |          |
| Unit cell dimensions   | a = 36.302(8) Å                   | a = 90 ° |
|                        | b = 17.985(4) Å                   | b = 90 ° |
|                        | c = 8.873(2) Å                    | g = 90 ° |
| Volume                 | 5793(2) Å <sup>3</sup>            |          |
| Z                      | 8                                 |          |
| Density (calculated)   | 1.019 Mg/m <sup>3</sup>           |          |
| Absorption coefficient | 0.060 mm <sup>-1</sup>            |          |
| F(000)                 | 1904                              |          |
| Crystal size           | 0.18 x 0.15 x 0.1 mm <sup>3</sup> |          |

|                                   |                                             |
|-----------------------------------|---------------------------------------------|
| Theta range for data collection   | 2.028 to 24.998 °                           |
| Index ranges                      | -43<=h<=35, -21<=k<=21, -10<=l<=10          |
| Reflections collected             | 40663                                       |
| Independent reflections           | 5099 [R(int) = 0.1790]                      |
| Completeness to theta = 25.242 °  | 97.1 %                                      |
| Absorption correction             | Semi-empirical from equivalents             |
| Max. and min. transmission        | 0.7456 and 0.5131                           |
| Refinement method                 | Full-matrix least-squares on F <sup>2</sup> |
| Data / restraints / parameters    | 5099 / 104 / 346                            |
| Goodness-of-fit on F <sup>2</sup> | 0.995                                       |
| Final R indices [I>2sigma(I)]     | R1 = 0.0989, wR2 = 0.2551                   |
| R indices (all data)              | R1 = 0.1704, wR2 = 0.3205                   |
| Extinction coefficient            | 0.018(3)                                    |
| Largest diff. peak and hole       | 0.373 and -0.396 e.Å <sup>-3</sup>          |

CCDC 2090251. For detailed crystallographic data, please refer to the Cambridge Crystallographic Data Centre at <http://ccdc.cam.ac.uk>.

7.319  
7.300  
7.282  
7.251  
7.242  
7.205  
7.189  
7.171  
7.153  
7.124  
7.106  
7.087  
6.959  
6.940  
6.261  
6.236

4.550  
4.525  
4.500

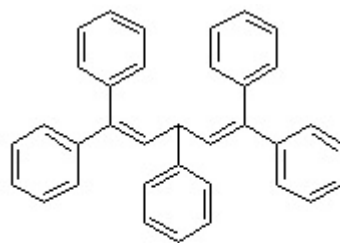

3aa (<sup>1</sup>H NMR, 400 MHz, CDCl<sub>3</sub>)

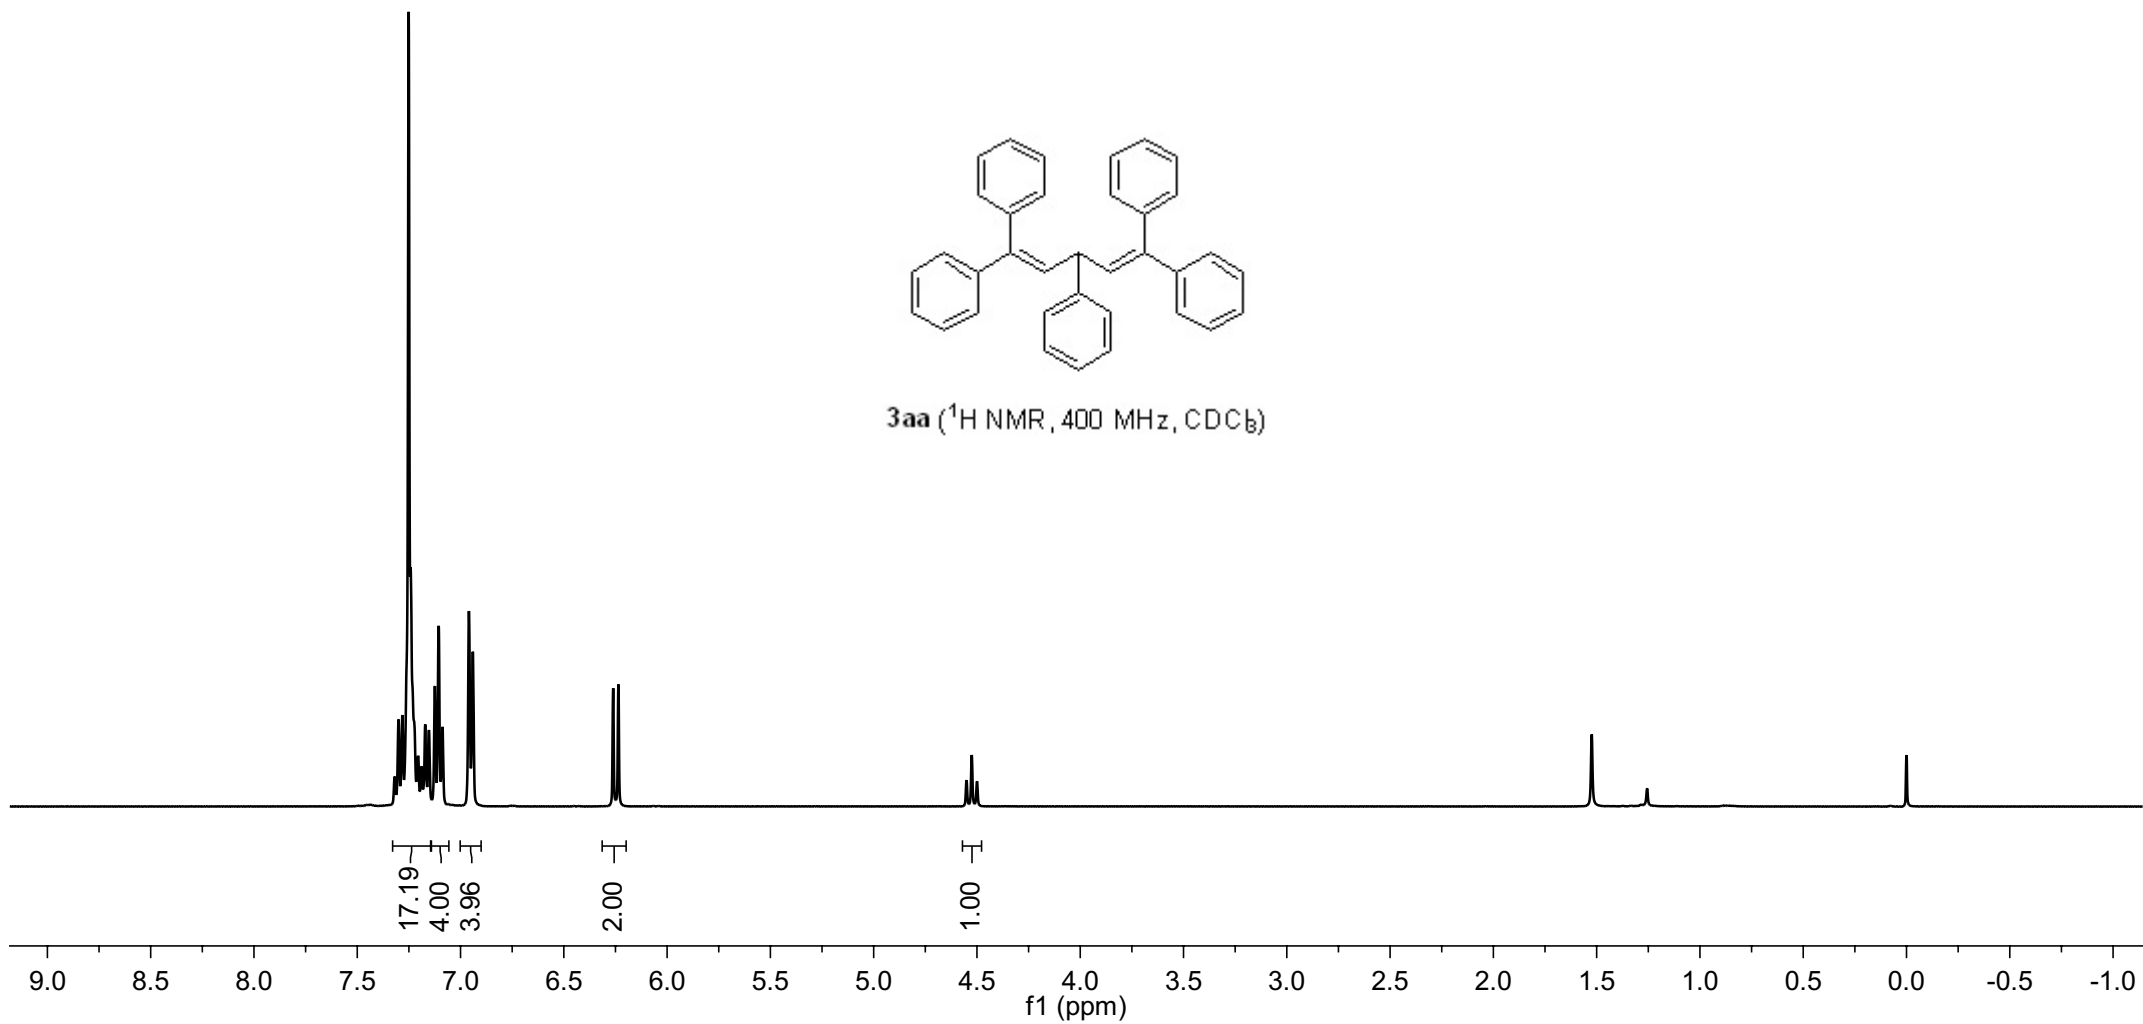

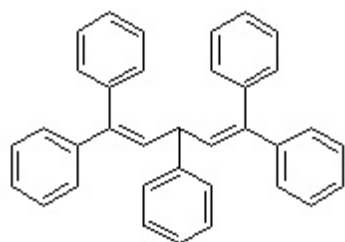

3aa (<sup>13</sup>C {<sup>1</sup>H} NMR, 100 MHz, CDCl<sub>3</sub>)

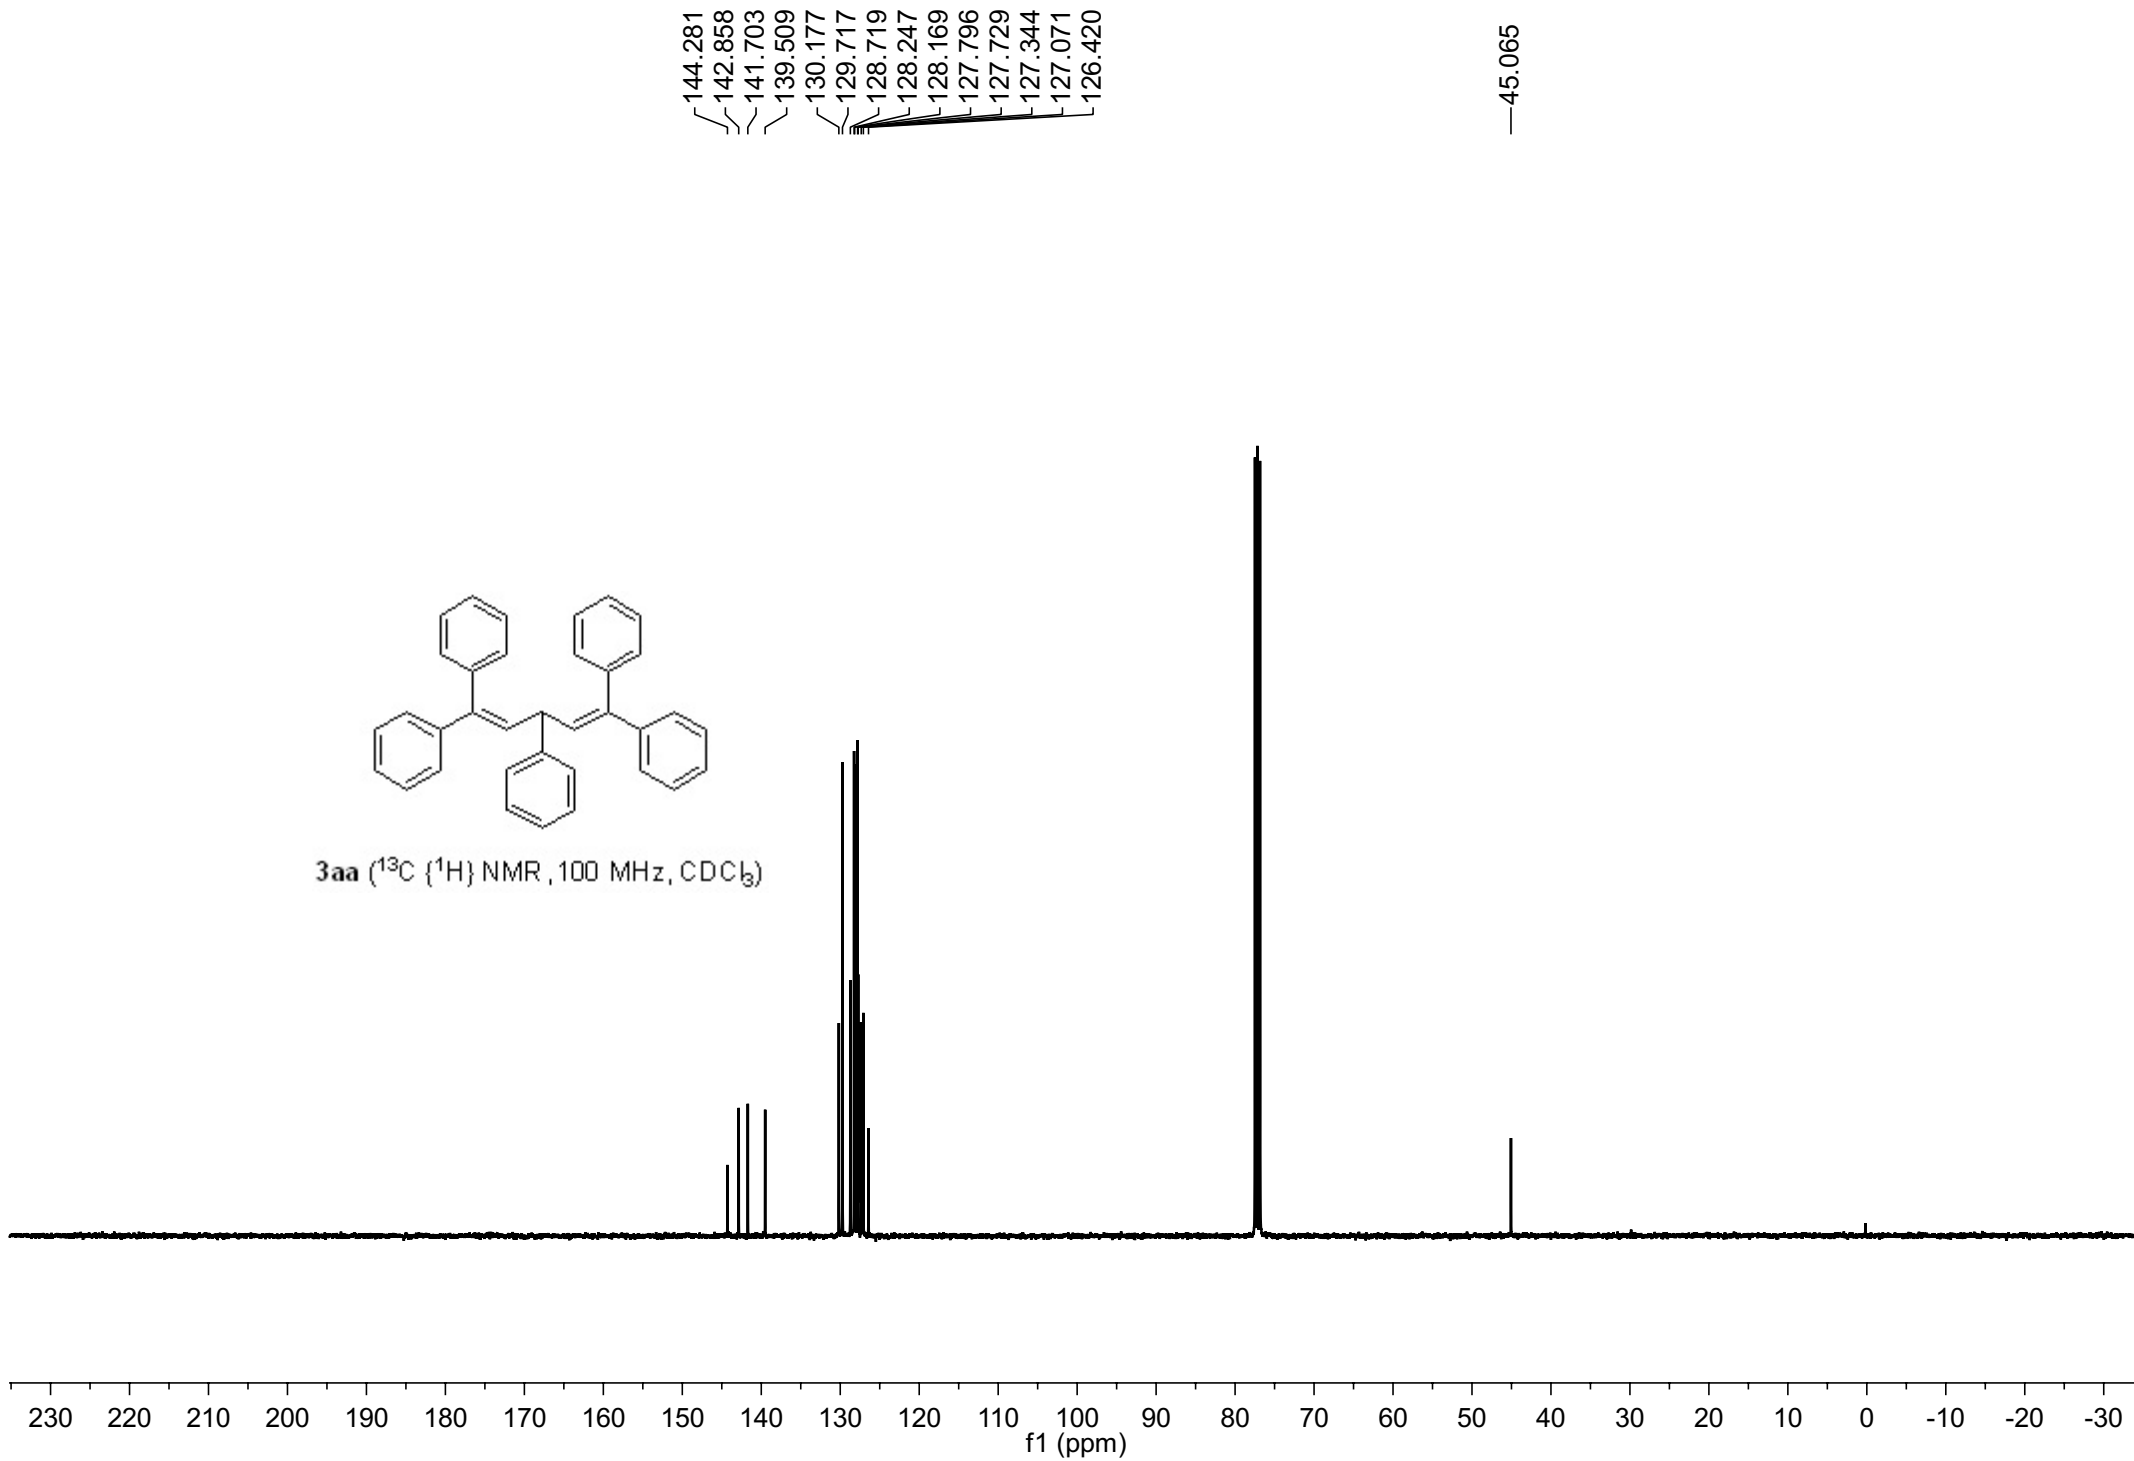

7.298  
7.283  
7.278  
7.262  
7.257  
7.241  
7.199  
7.193  
7.188  
7.182  
7.177  
7.157  
7.137  
7.064  
7.044  
6.901  
6.881  
6.837  
6.817  
6.168  
6.143

4.532  
4.506  
4.481

2.308  
2.303

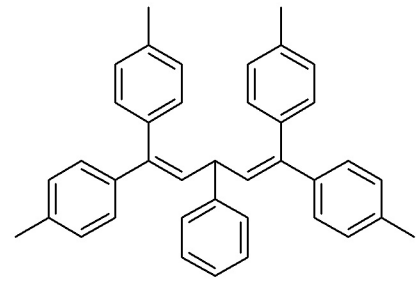

3af (<sup>1</sup>H NMR, 400 MHz, CDCl<sub>3</sub>)

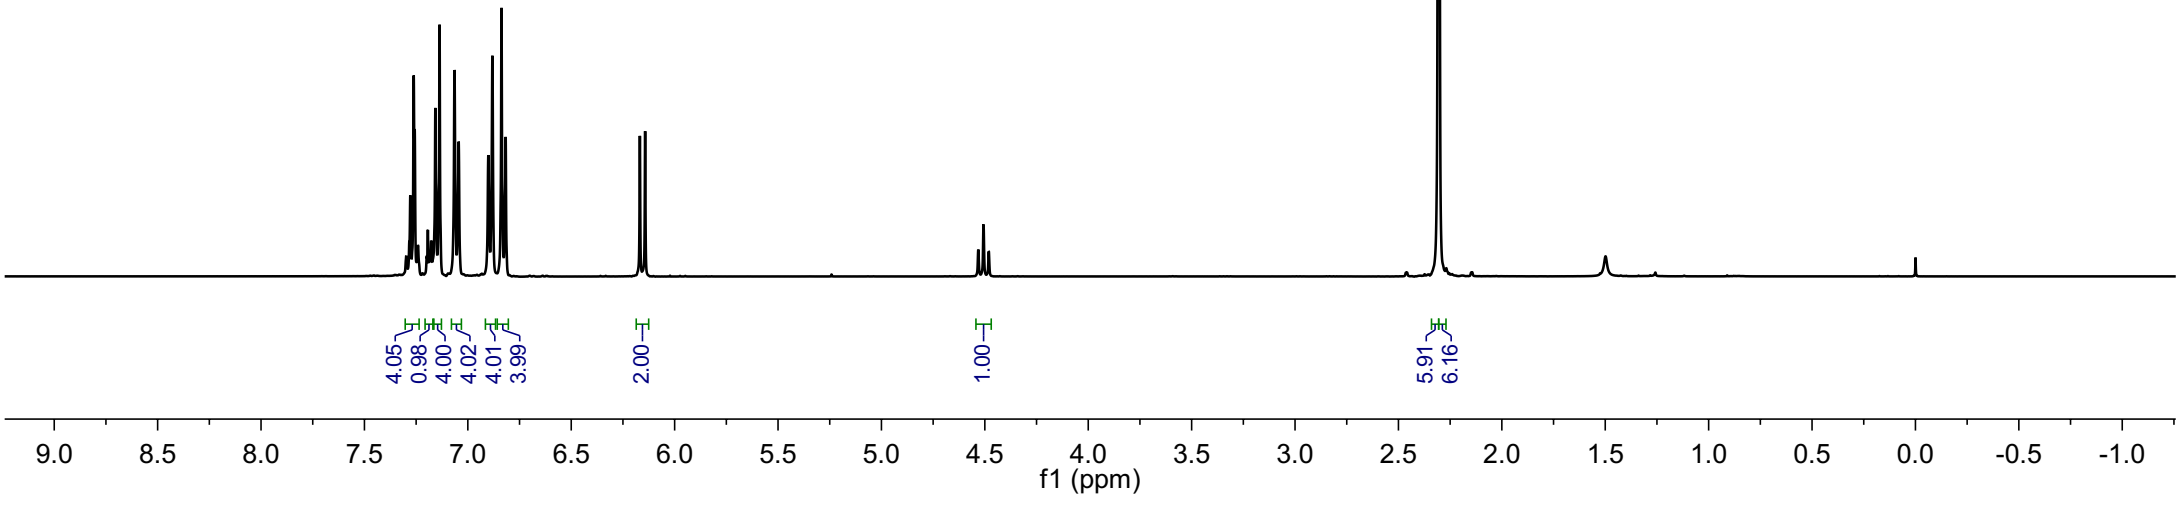



144.607  
141.303  
140.286  
137.001  
136.779  
136.354  
129.615  
129.297  
128.906  
128.720  
128.611  
127.777  
127.700  
126.259

—44.994

—21.339  
—21.215

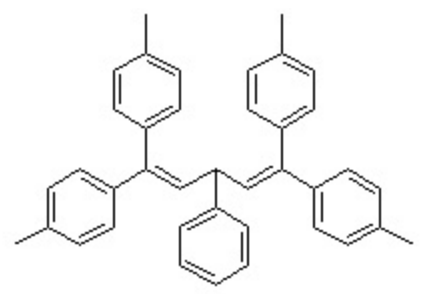

3af (<sup>13</sup>C {<sup>1</sup>H} NMR, 100 MHz, CDCl<sub>3</sub>)

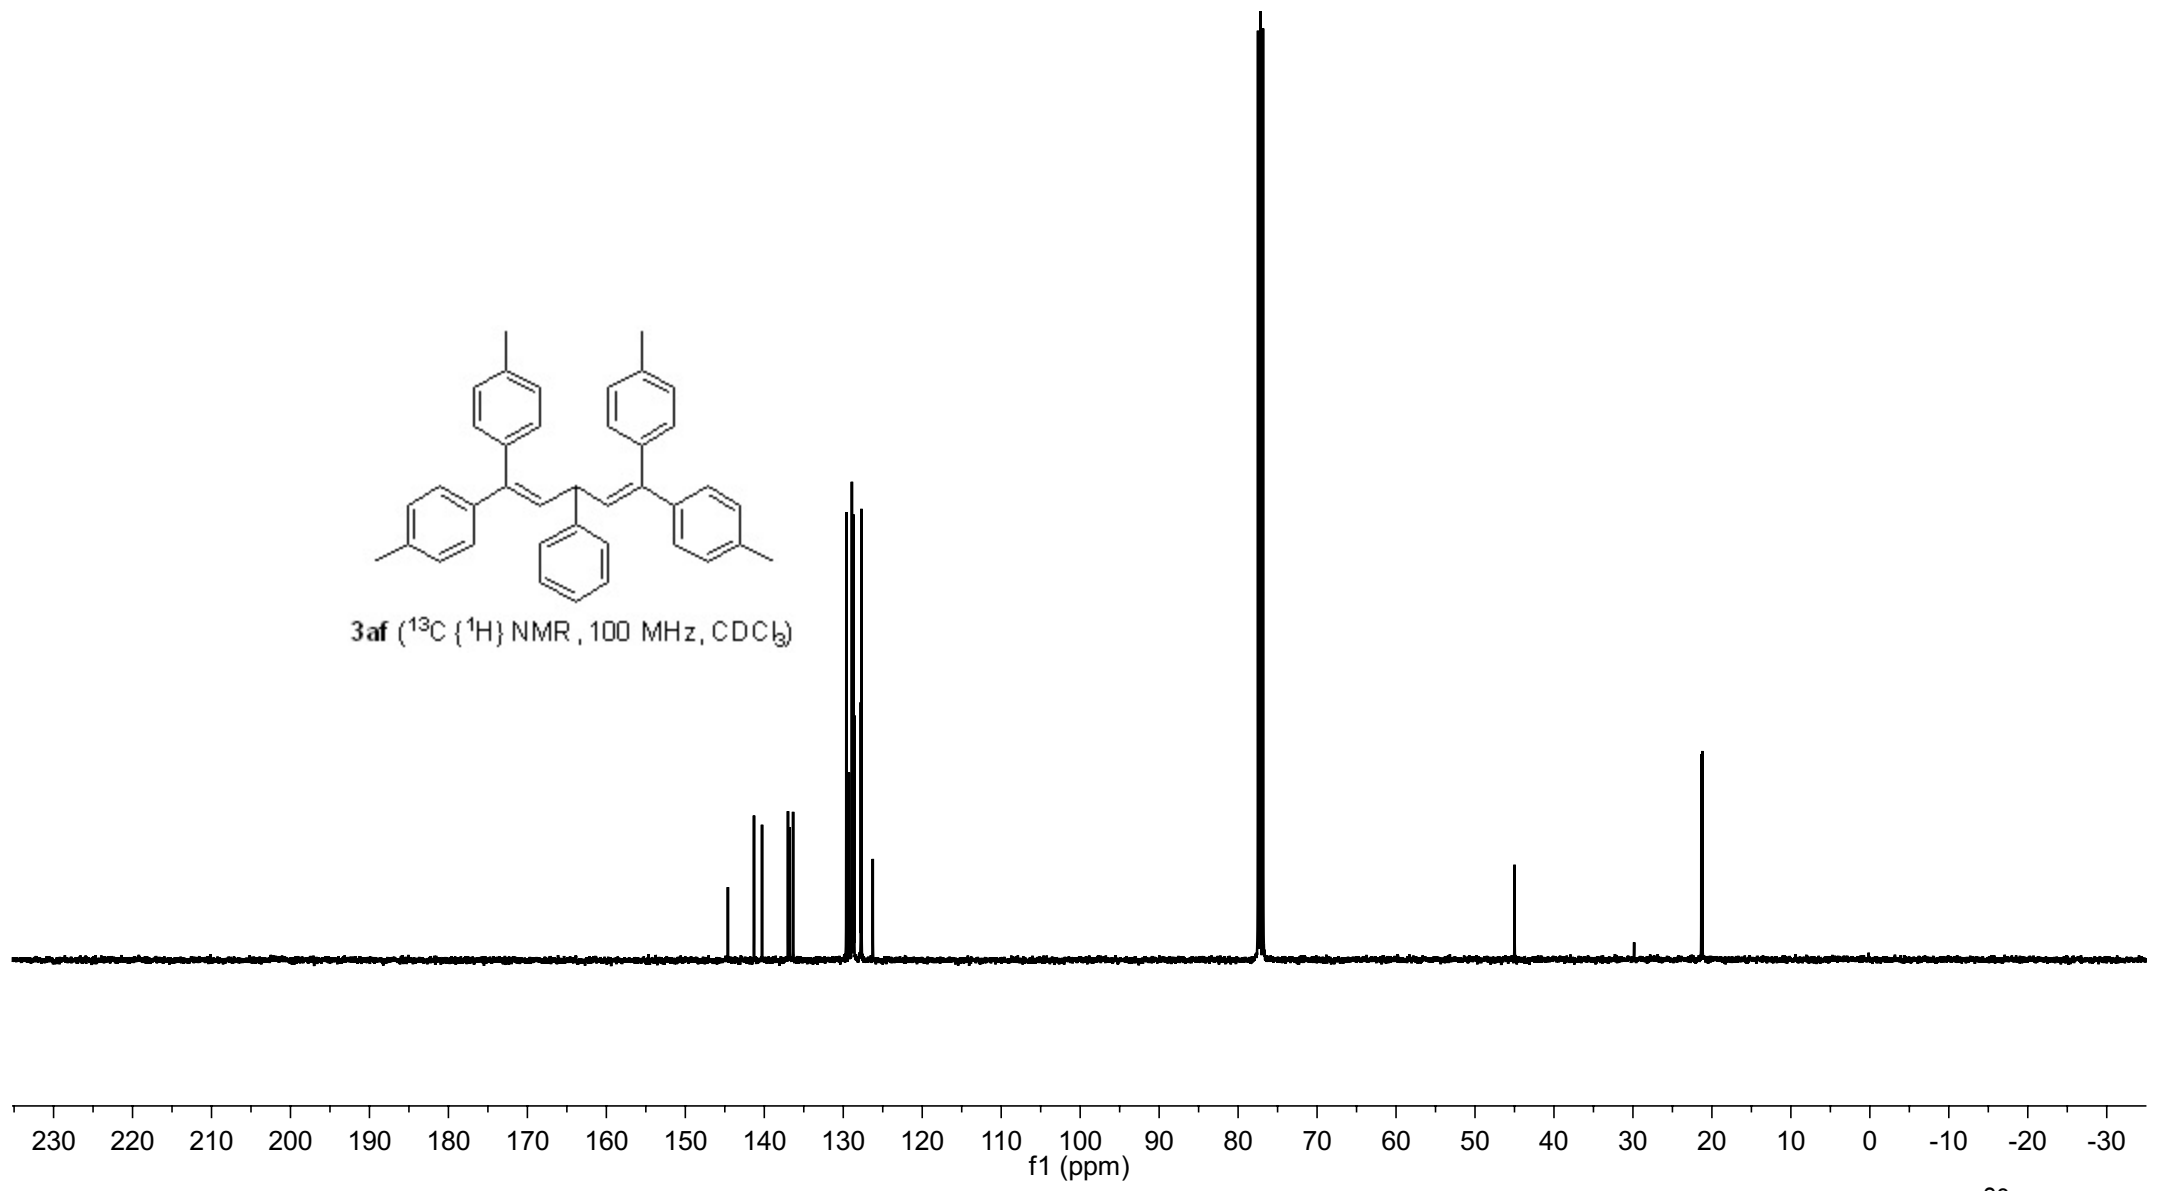

7.322  
7.302  
7.285  
7.266  
7.224  
7.203  
7.182  
6.892  
6.871  
6.811  
6.789  
6.653  
6.632  
6.100  
6.075

4.570  
4.545  
4.519

3.780  
3.768

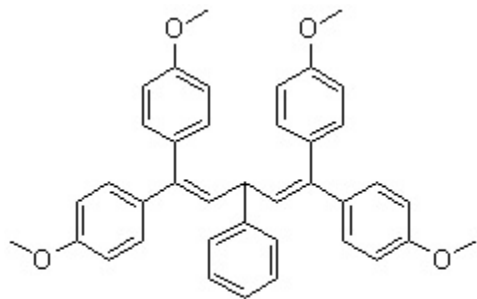

3ag (<sup>1</sup>H NMR, 400 MHz, CDCl<sub>3</sub>)

4.03

5.08

4.01

4.02

4.00

2.00

1.00

6.00

6.03

9.0 8.5 8.0 7.5 7.0 6.5 6.0 5.5 5.0 4.5 4.0 3.5 3.0 2.5 2.0 1.5 1.0 0.5 0.0 -0.5 -1.0

f1 (ppm)

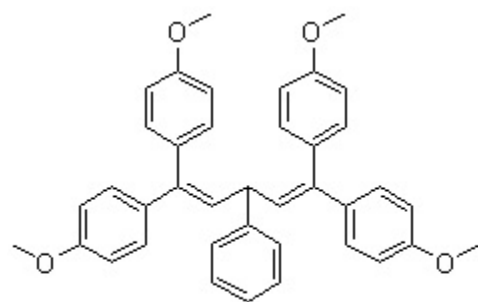

3ag ( $^{13}\text{C}$  { $^1\text{H}$ } NMR, 100 MHz,  $\text{CDCl}_3$ )

159.013  
158.559  
144.740  
140.430  
135.830  
132.138  
130.843  
128.939  
128.627  
128.419  
127.719  
126.263  
113.533  
113.402

55.406  
55.137  
45.016

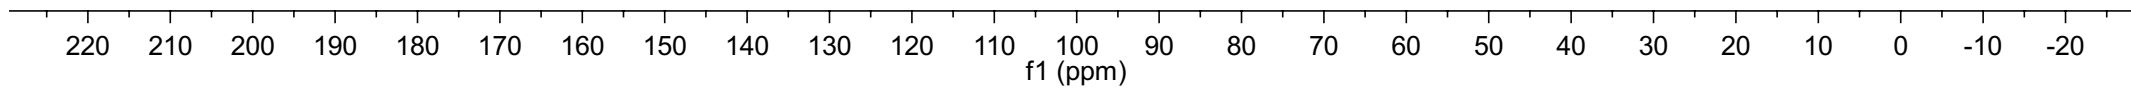

7.354  
7.341  
7.323  
7.286  
7.267  
7.254  
7.248  
7.230  
7.204  
7.186  
7.168  
7.149  
7.139  
7.131  
7.121  
7.103  
6.933  
6.916  
6.214  
6.189

4.499  
4.474  
4.448

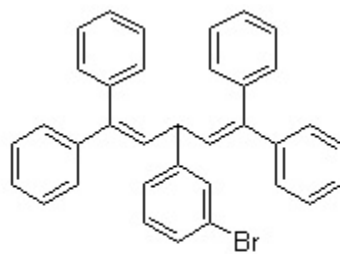

3ba (<sup>1</sup>H NMR, 400 MHz, CDCl<sub>3</sub>)

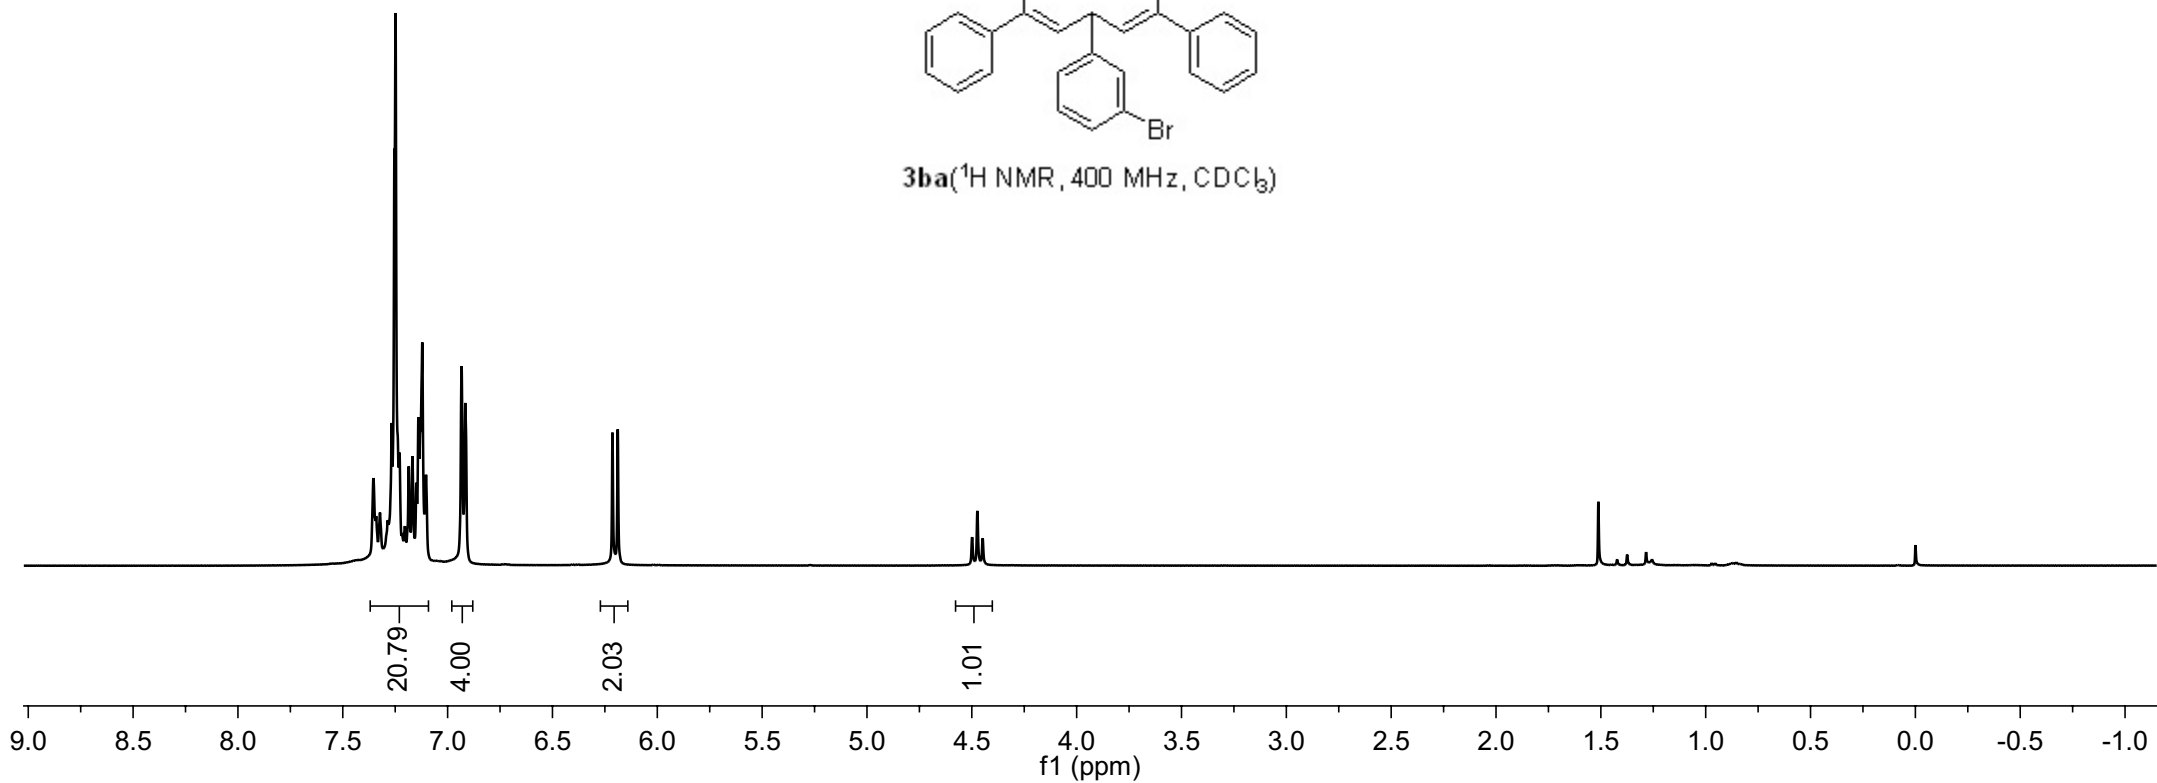

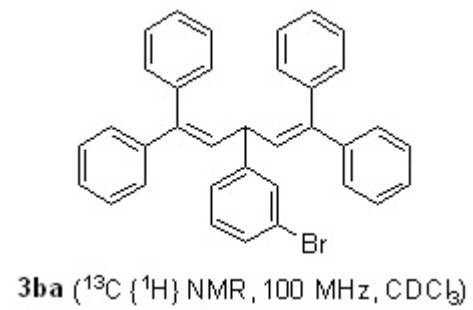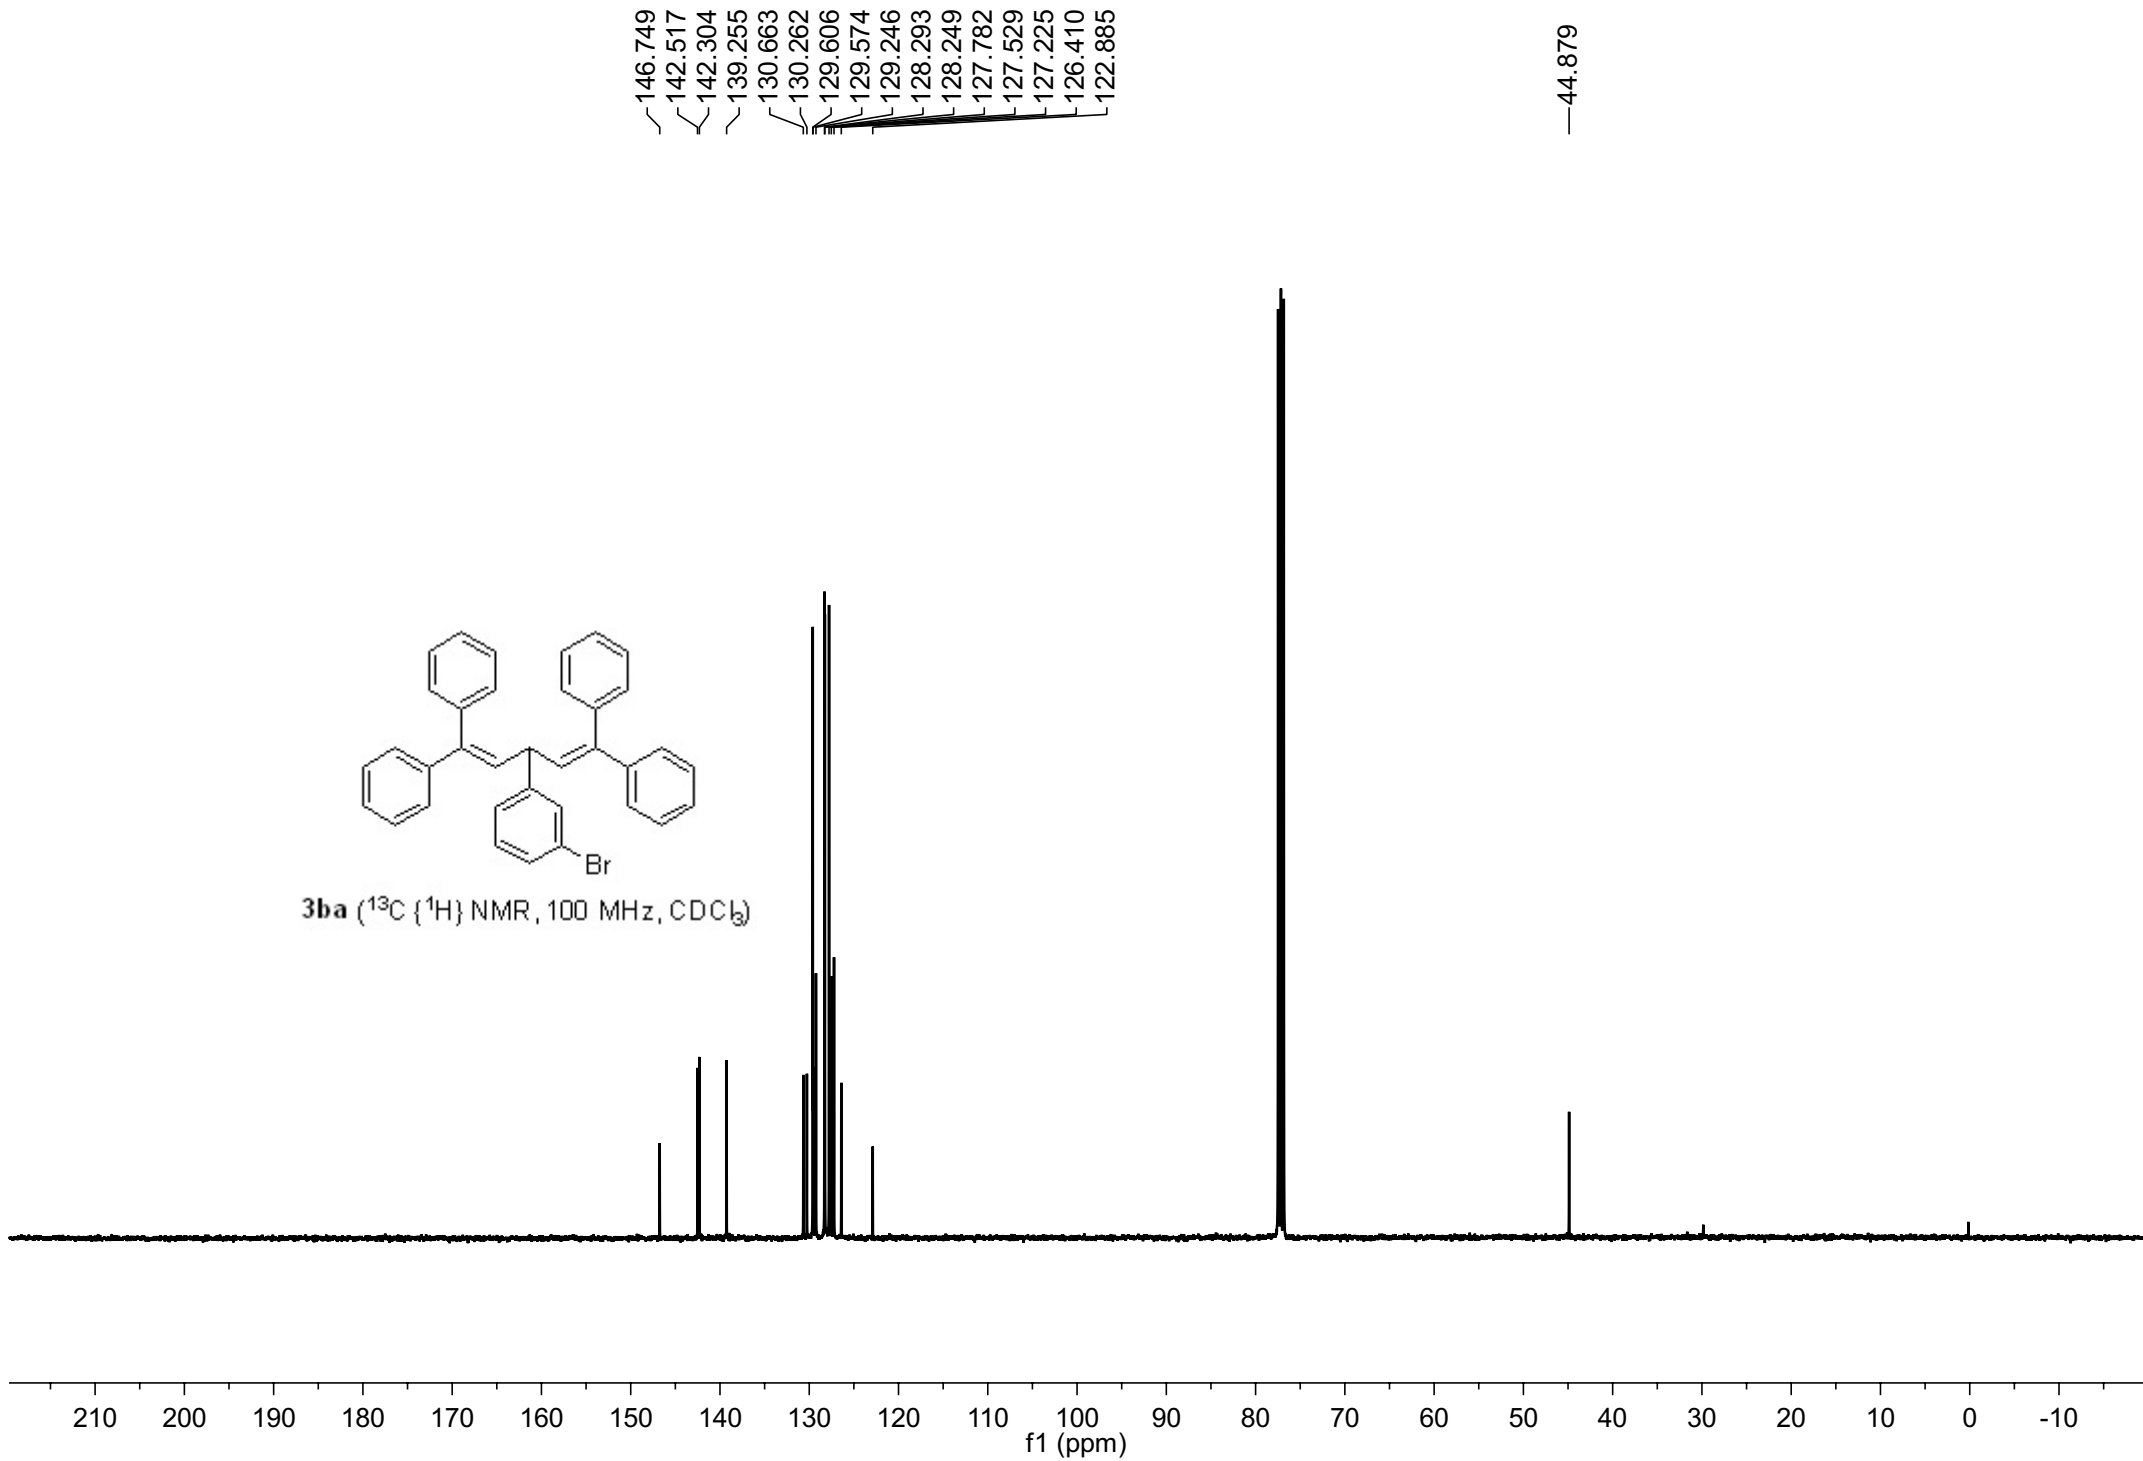

7.369  
7.328  
7.322  
7.314  
7.309  
7.306  
7.301  
7.222  
7.153  
7.146  
7.144  
7.137  
7.133  
7.080  
7.060  
6.918  
6.899  
6.813  
6.793  
6.719  
6.094

4.488  
4.463  
4.438

2.320  
2.315

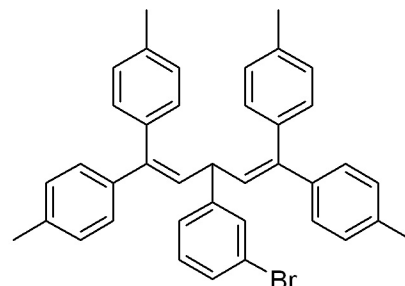

**3bf** ( $^1\text{H}$  NMR, 400 MHz,  $\text{CDCl}_3$ )

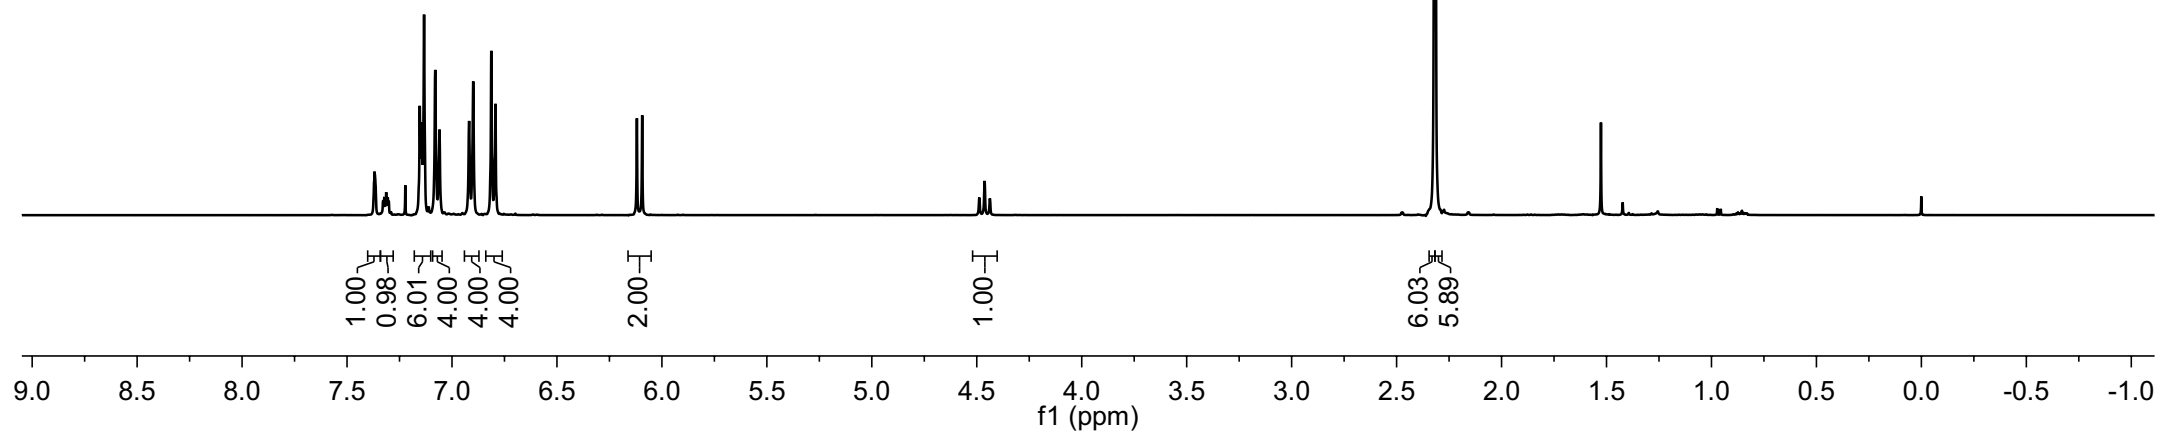

147.161  
141.942  
139.975  
137.217  
136.561  
136.543  
130.728  
130.153  
129.524  
129.413  
128.953  
128.805  
128.405  
127.689  
126.460  
122.832

—44.871

—21.340  
—21.215

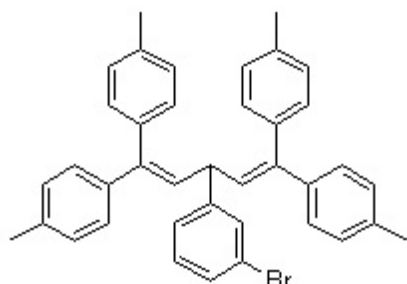

3bf ( $^{13}\text{C}$  ( $^1\text{H}$ ) NMR, 100 MHz,  $\text{CDCl}_3$ )

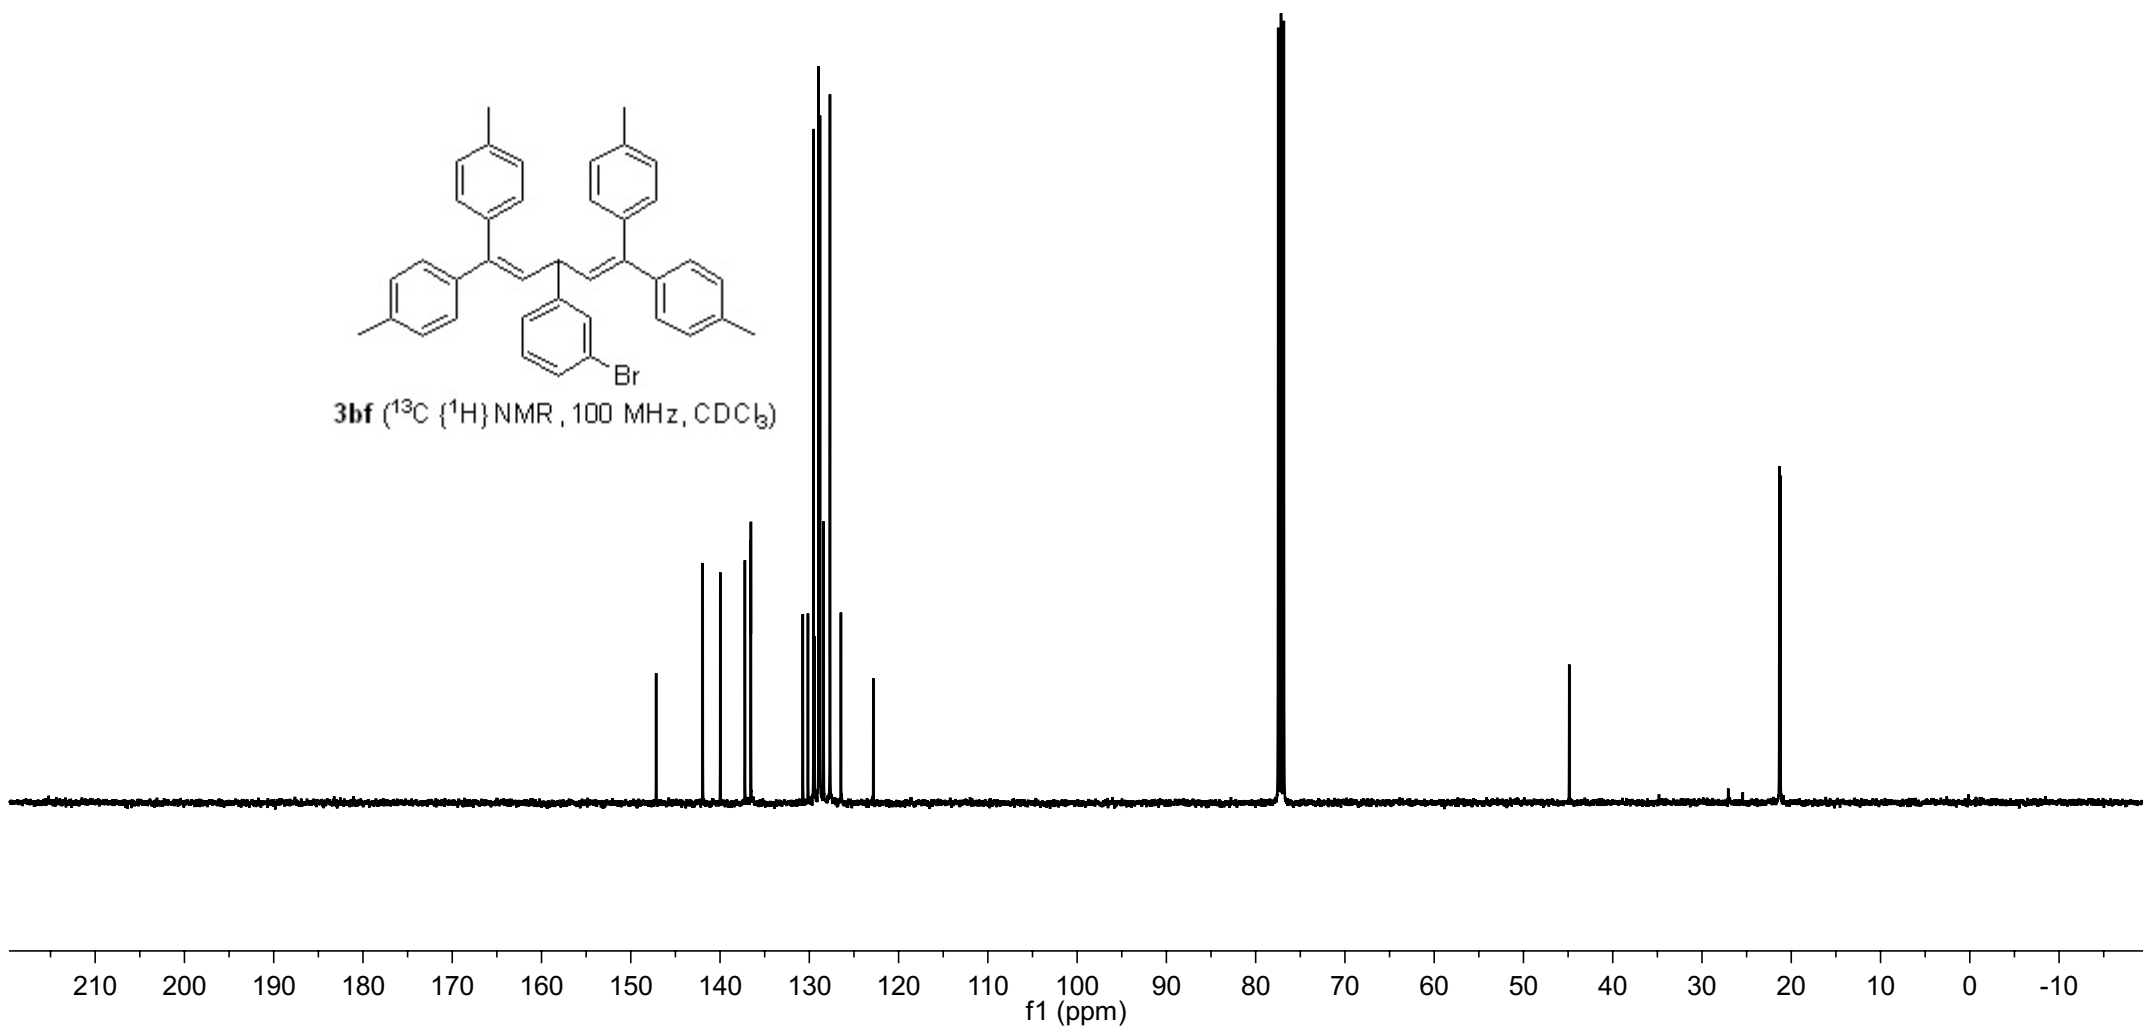

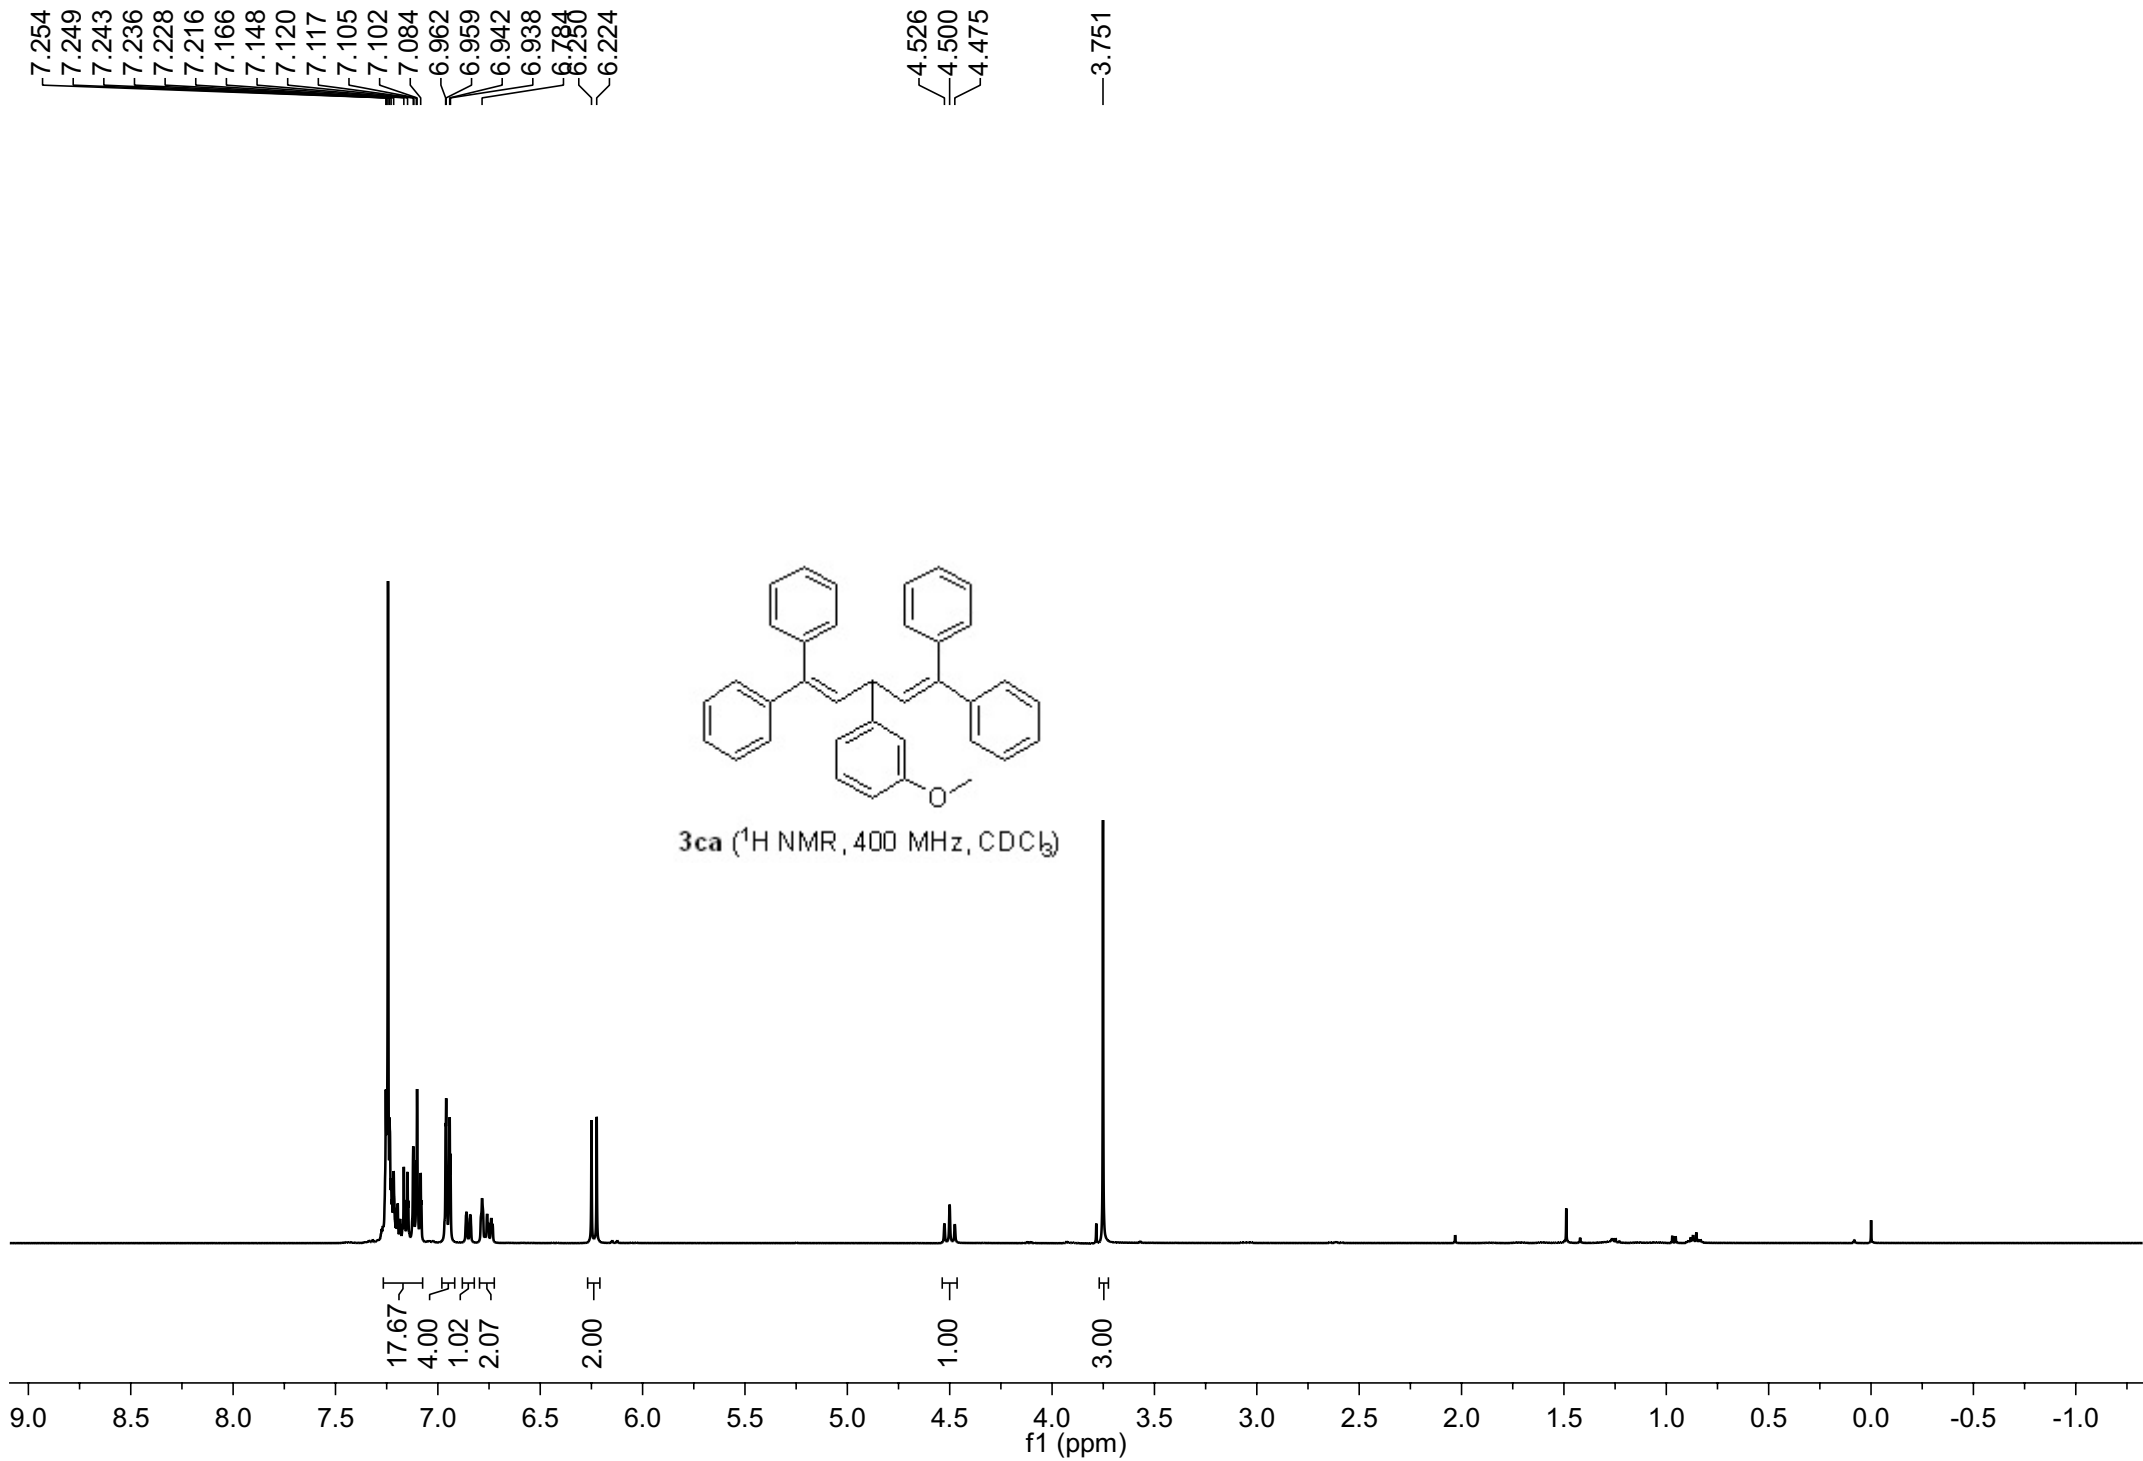



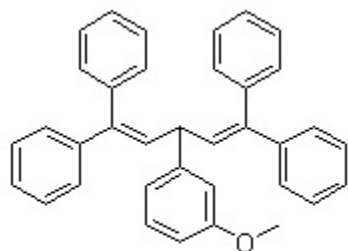

3ca (<sup>13</sup>C {<sup>1</sup>H} NMR, 100 MHz, CDCl<sub>3</sub>)

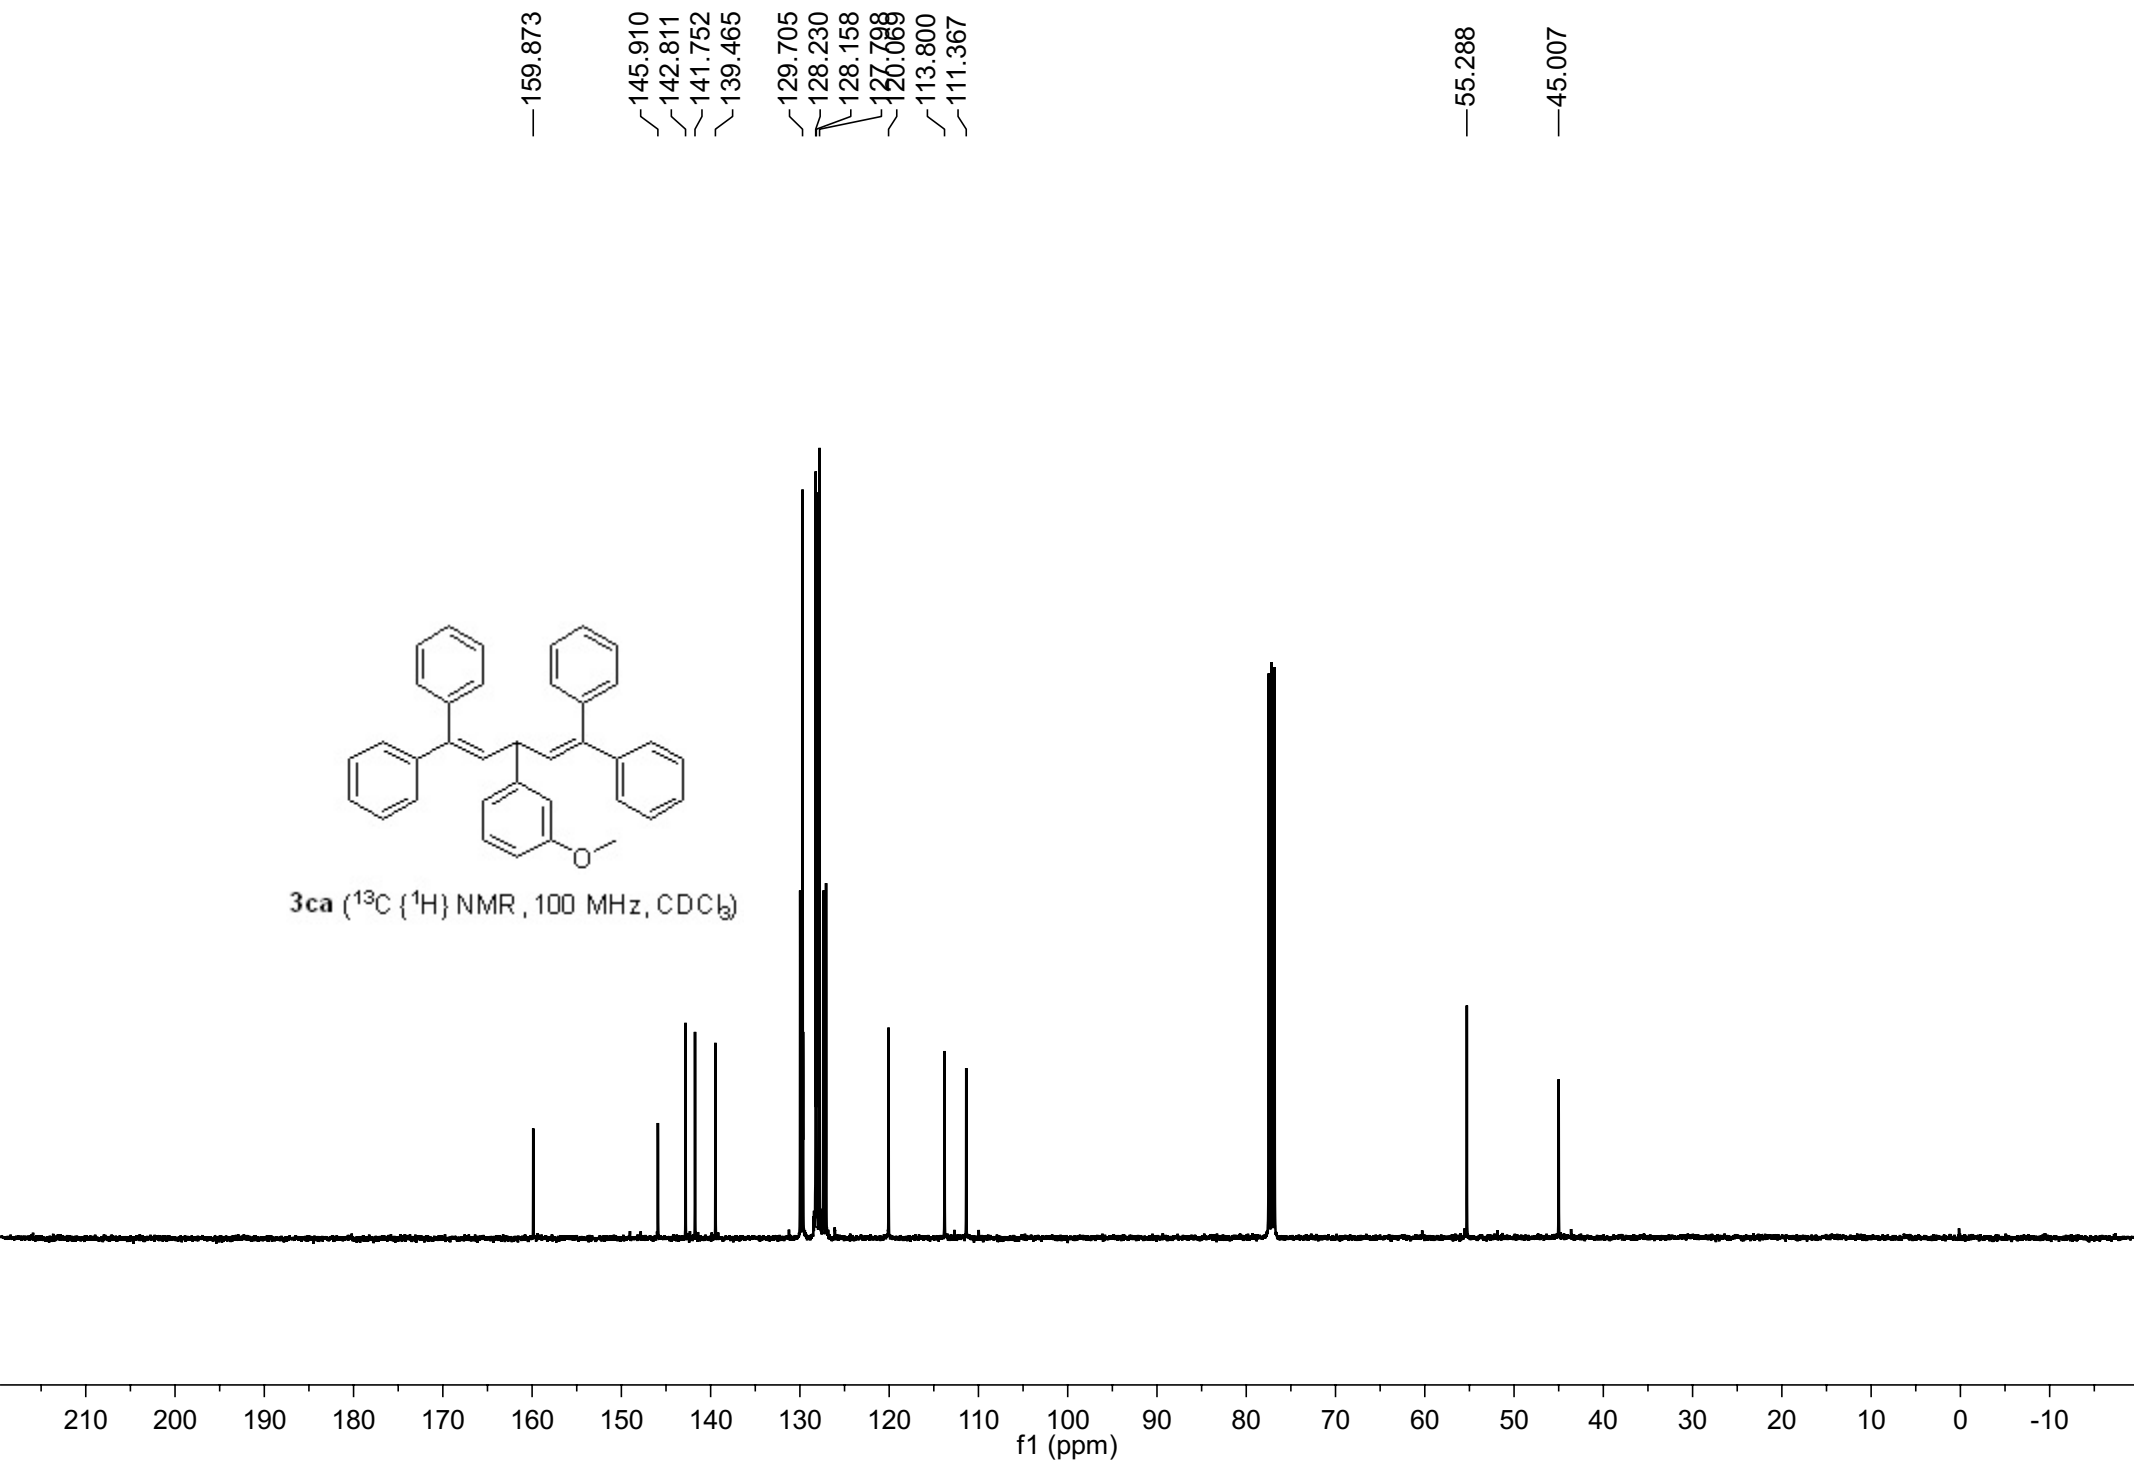

7.263  
7.259  
7.251  
7.248  
7.239  
7.212  
7.207  
7.188  
7.183  
7.164  
7.136  
7.121  
7.117  
7.099  
6.940  
6.937  
6.920  
6.916  
6.217  
6.192

4.508  
4.483  
4.458

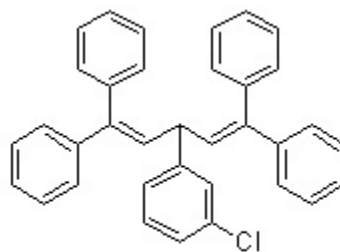

3da (<sup>1</sup>H NMR, 400 MHz, CDCl<sub>3</sub>)

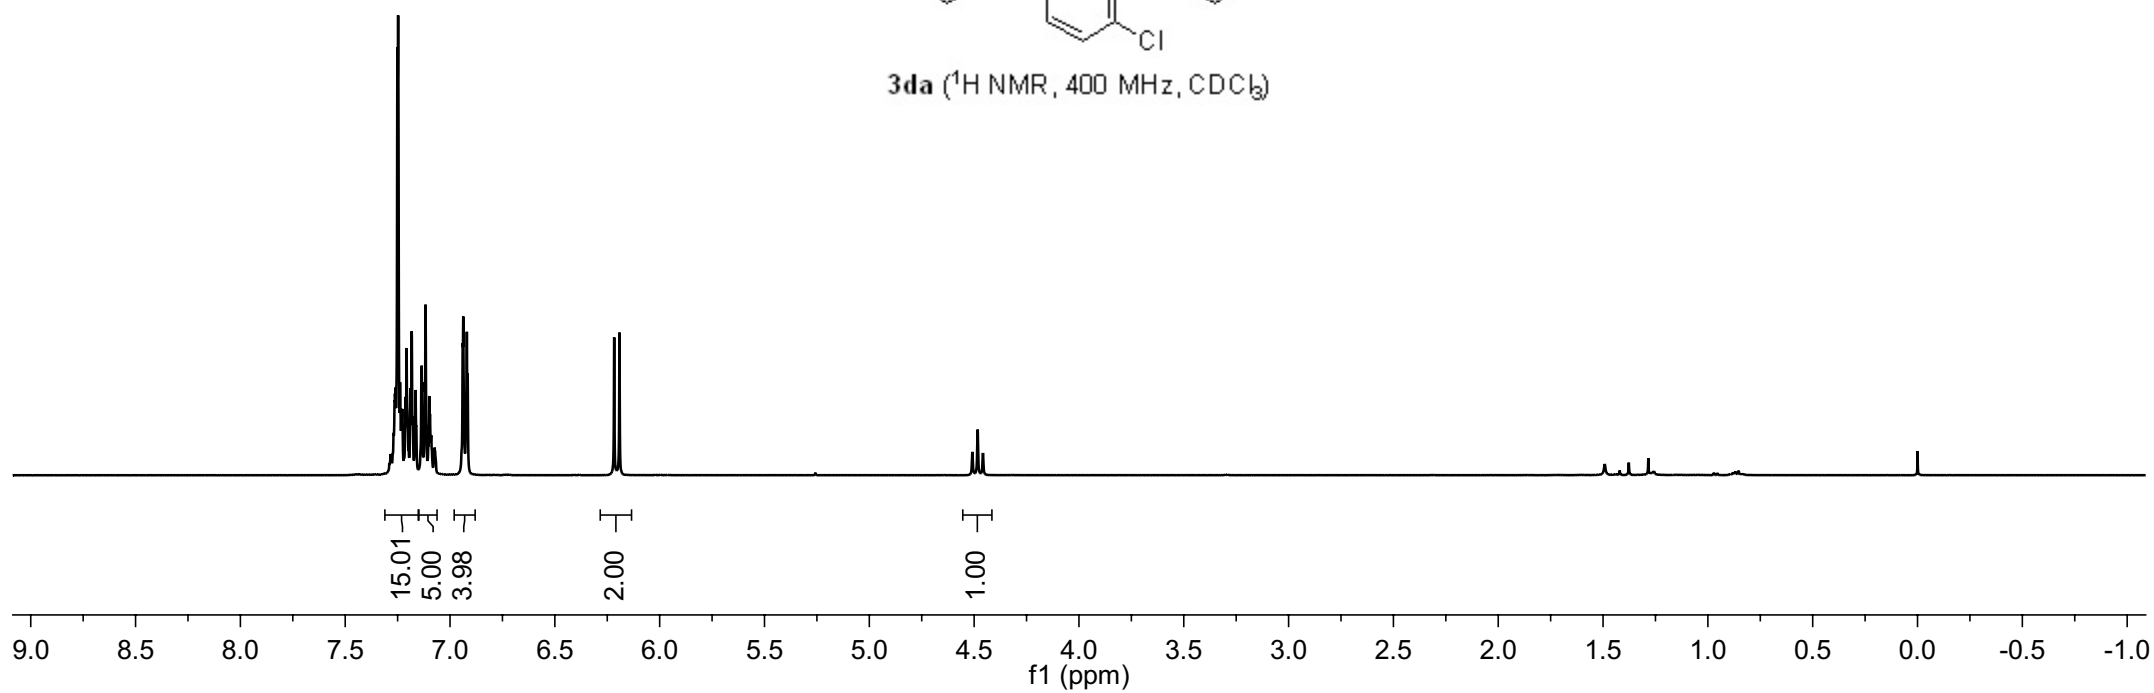

146.469  
142.540  
142.305  
139.287  
134.544  
129.941  
129.615  
129.292  
128.294  
128.249  
127.780  
127.522  
127.220  
126.644  
125.932

—44.898

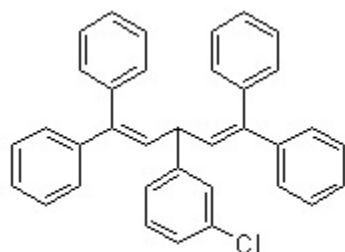

3da ( $^{13}\text{C}$  { $^1\text{H}$ } NMR, 100 MHz,  $\text{CDCl}_3$ )

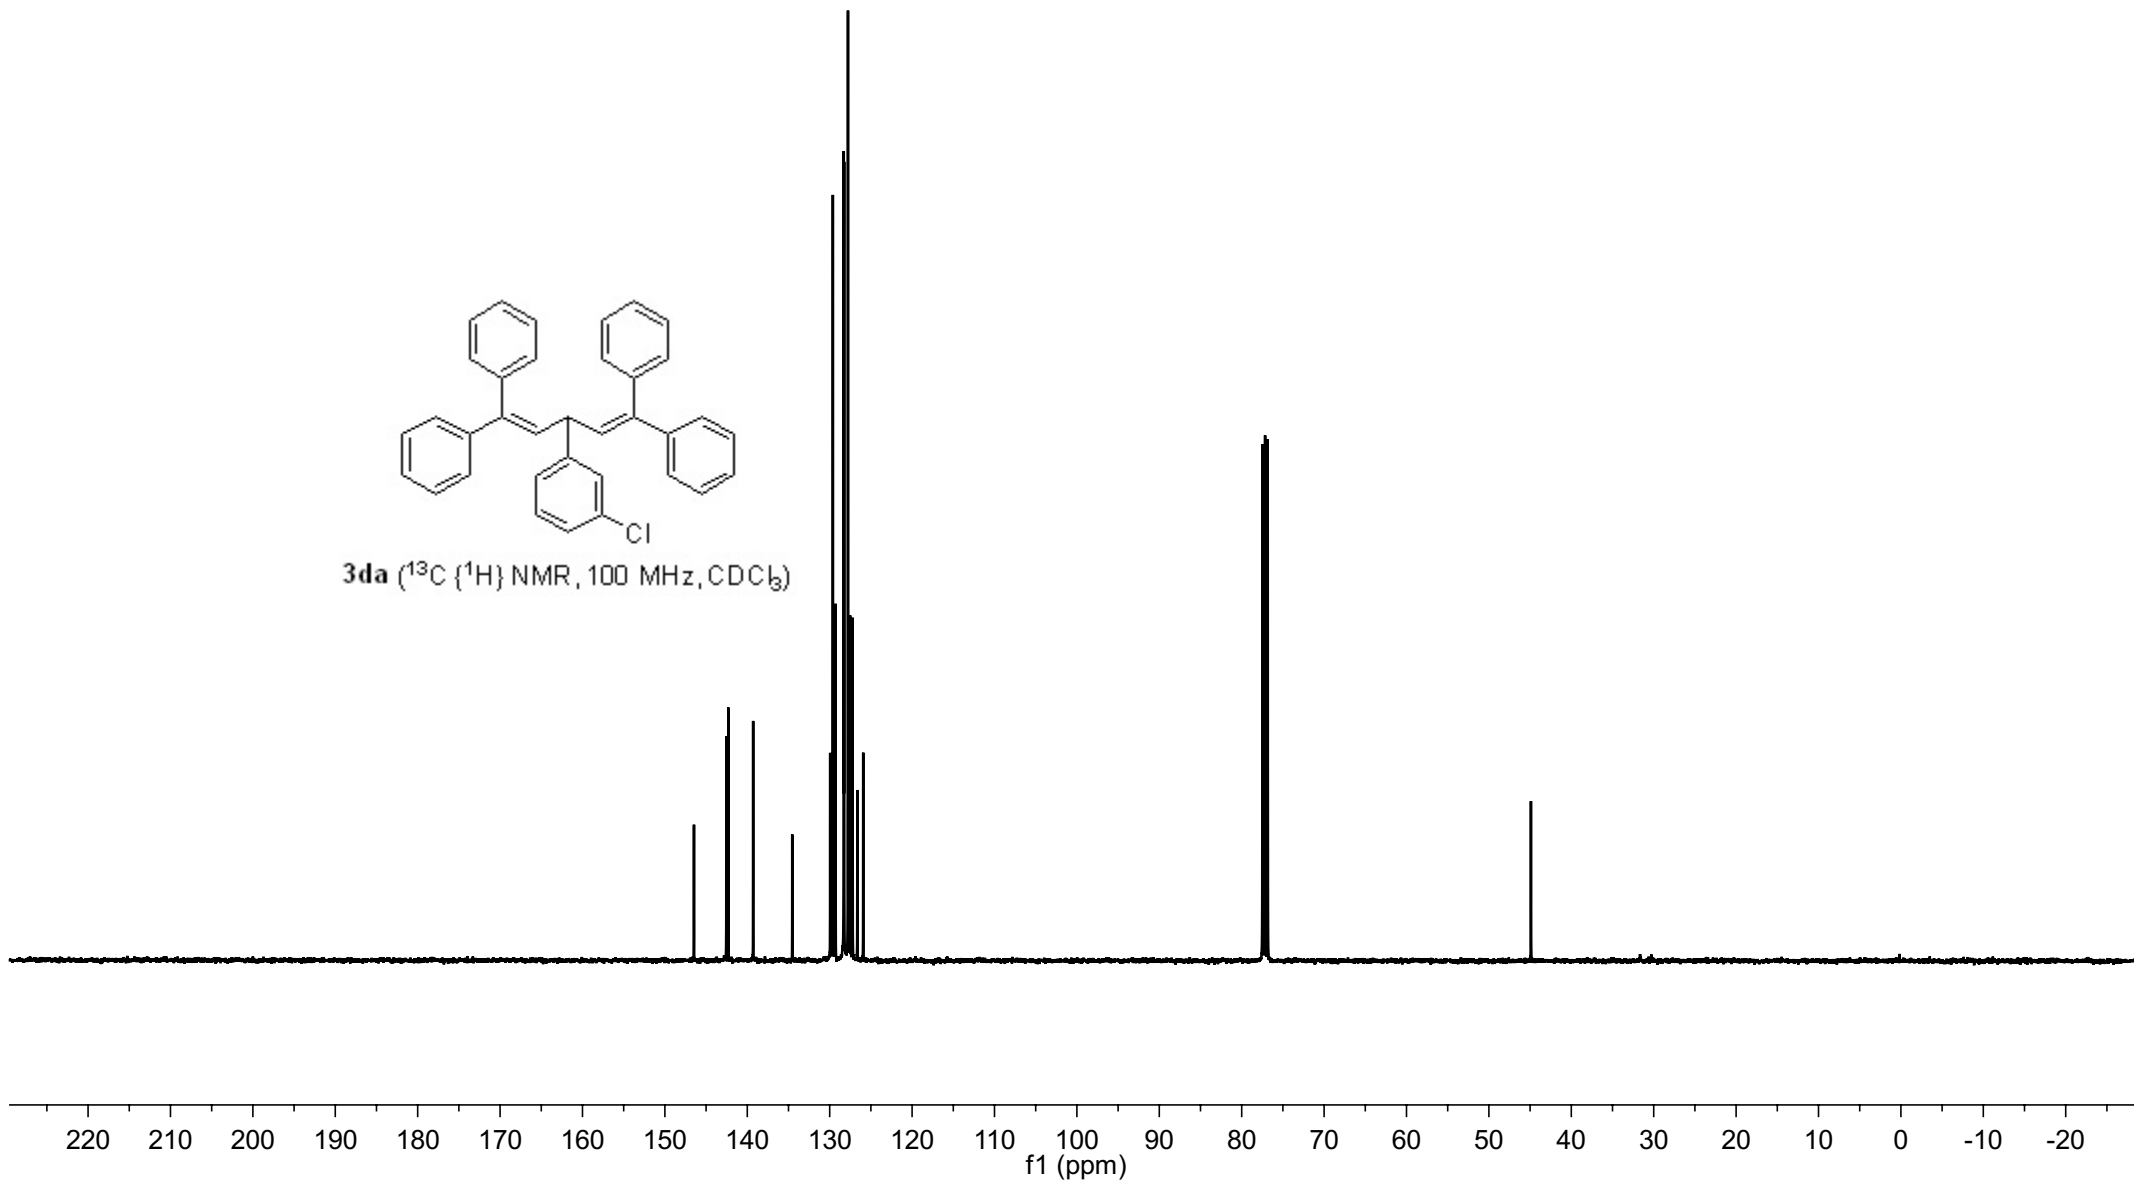

7.225  
7.212  
7.194  
7.176  
7.169  
7.165  
7.160  
7.149  
7.129  
7.105  
7.086  
7.074  
7.054  
6.917  
6.897  
6.813  
6.793  
6.121  
6.096

4.483  
4.458  
4.433

2.317  
2.312

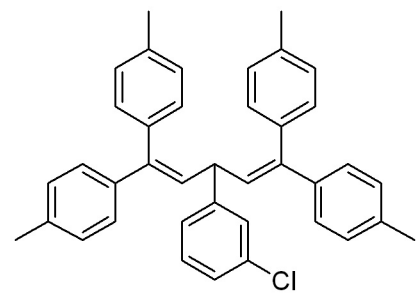

3df (<sup>1</sup>H NMR, 400 MHz, CDCl<sub>3</sub>)

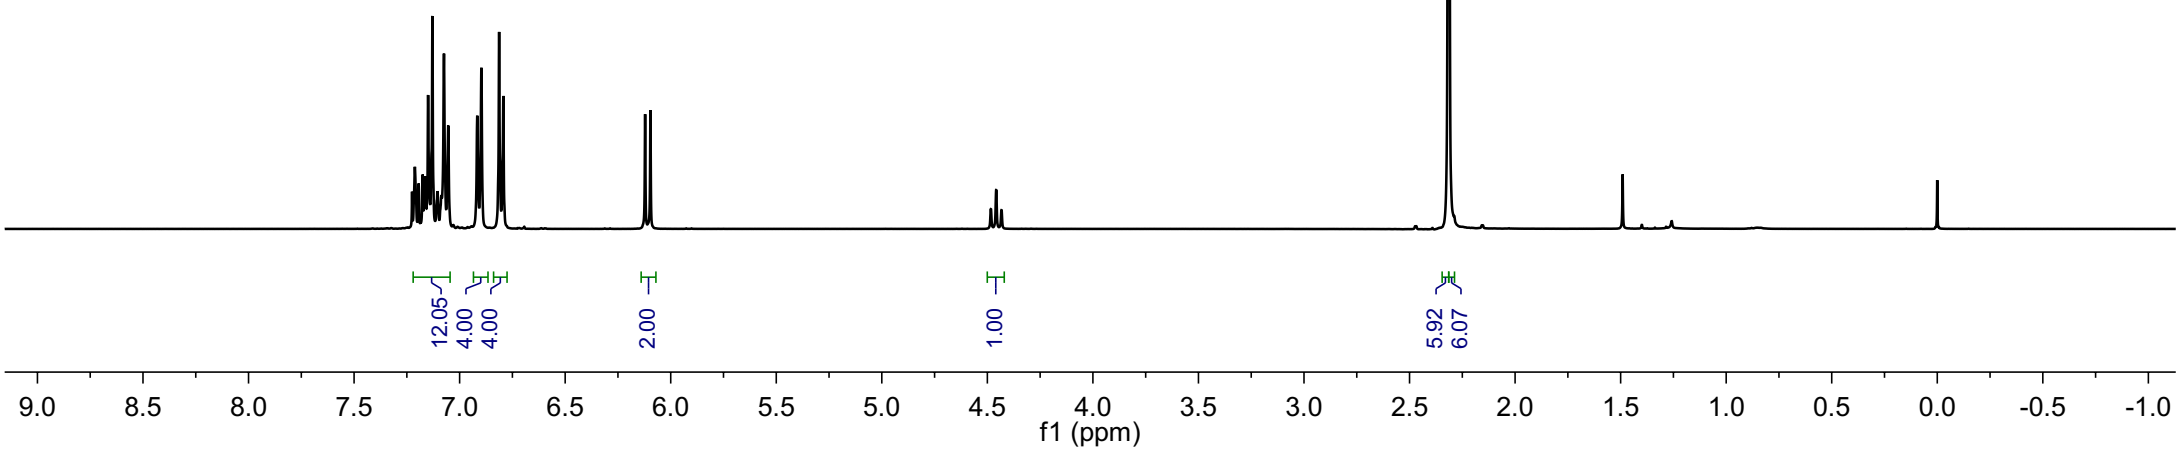

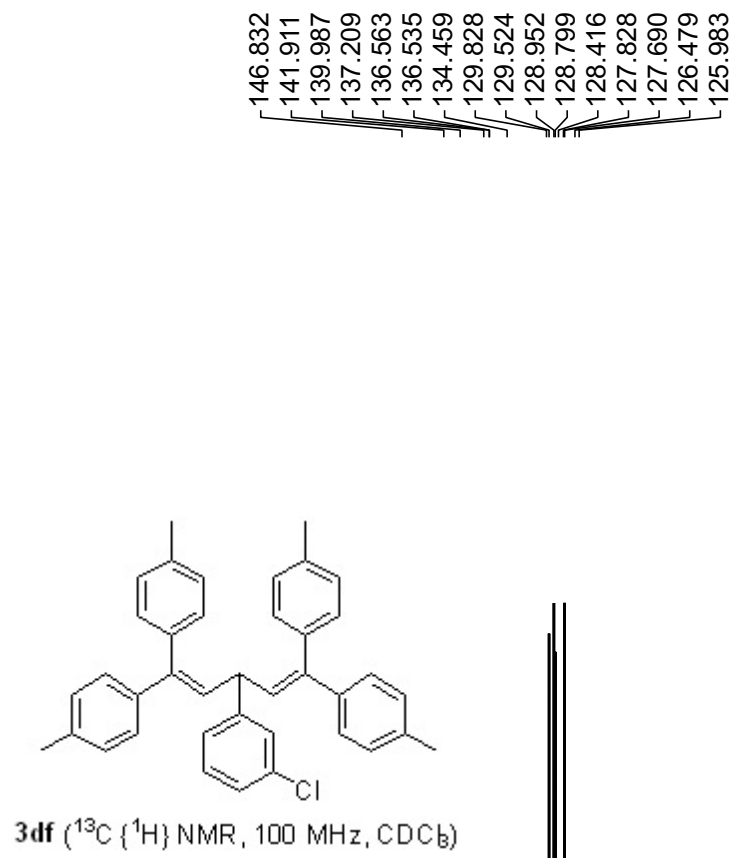

146.832  
 141.911  
 139.987  
 137.209  
 136.563  
 136.535  
 134.459  
 129.828  
 129.524  
 128.952  
 128.799  
 128.416  
 127.828  
 127.690  
 126.479  
 125.983

—44.852

21.341  
 21.218

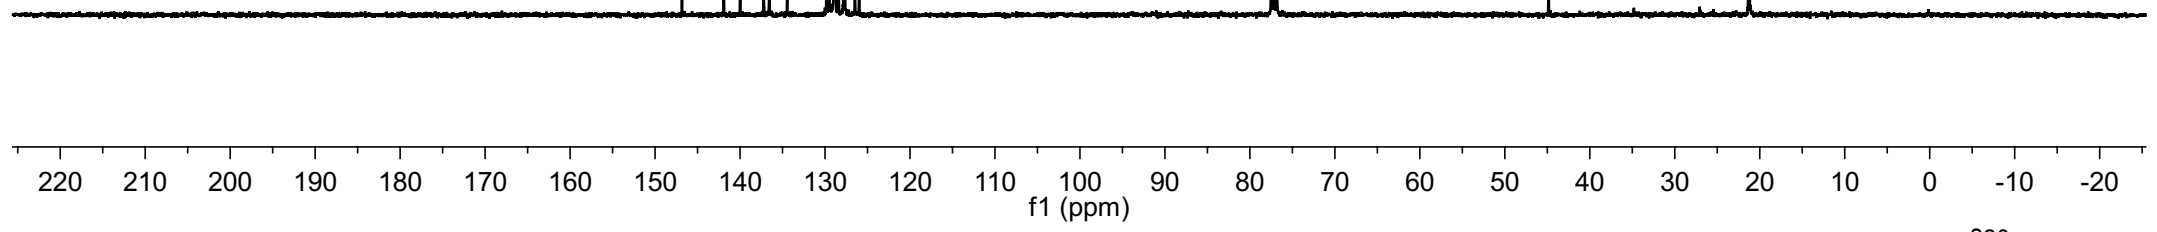

7.243  
7.238  
7.218  
7.197  
7.176  
7.130  
7.112  
6.868  
6.847  
6.819  
6.798  
6.666  
6.645  
6.052  
6.027

4.525  
4.500  
4.475

3.791  
3.780

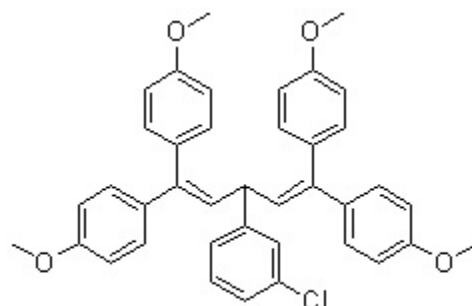

8.36

8.00

4.00

2.00

1.02

6.02

5.88

9.0 8.5 8.0 7.5 7.0 6.5 6.0 5.5 5.0 4.5 f1 (ppm) 4.0 3.5 3.0 2.5 2.0 1.5 1.0 0.5 0.0 -0.5 -1.0

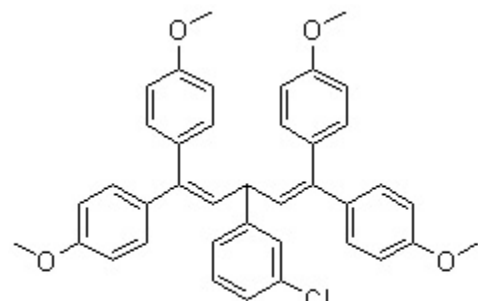

3dg ( $^{13}\text{C}$  { $^1\text{H}$ } NMR, 100 MHz,  $\text{CDCl}_3$ )

159.159  
158.675  
141.042  
135.558  
134.456  
131.922  
130.783  
129.858  
128.962  
127.776  
127.562  
126.478  
125.960  
125.596  
113.499

55.440  
55.174

44.897

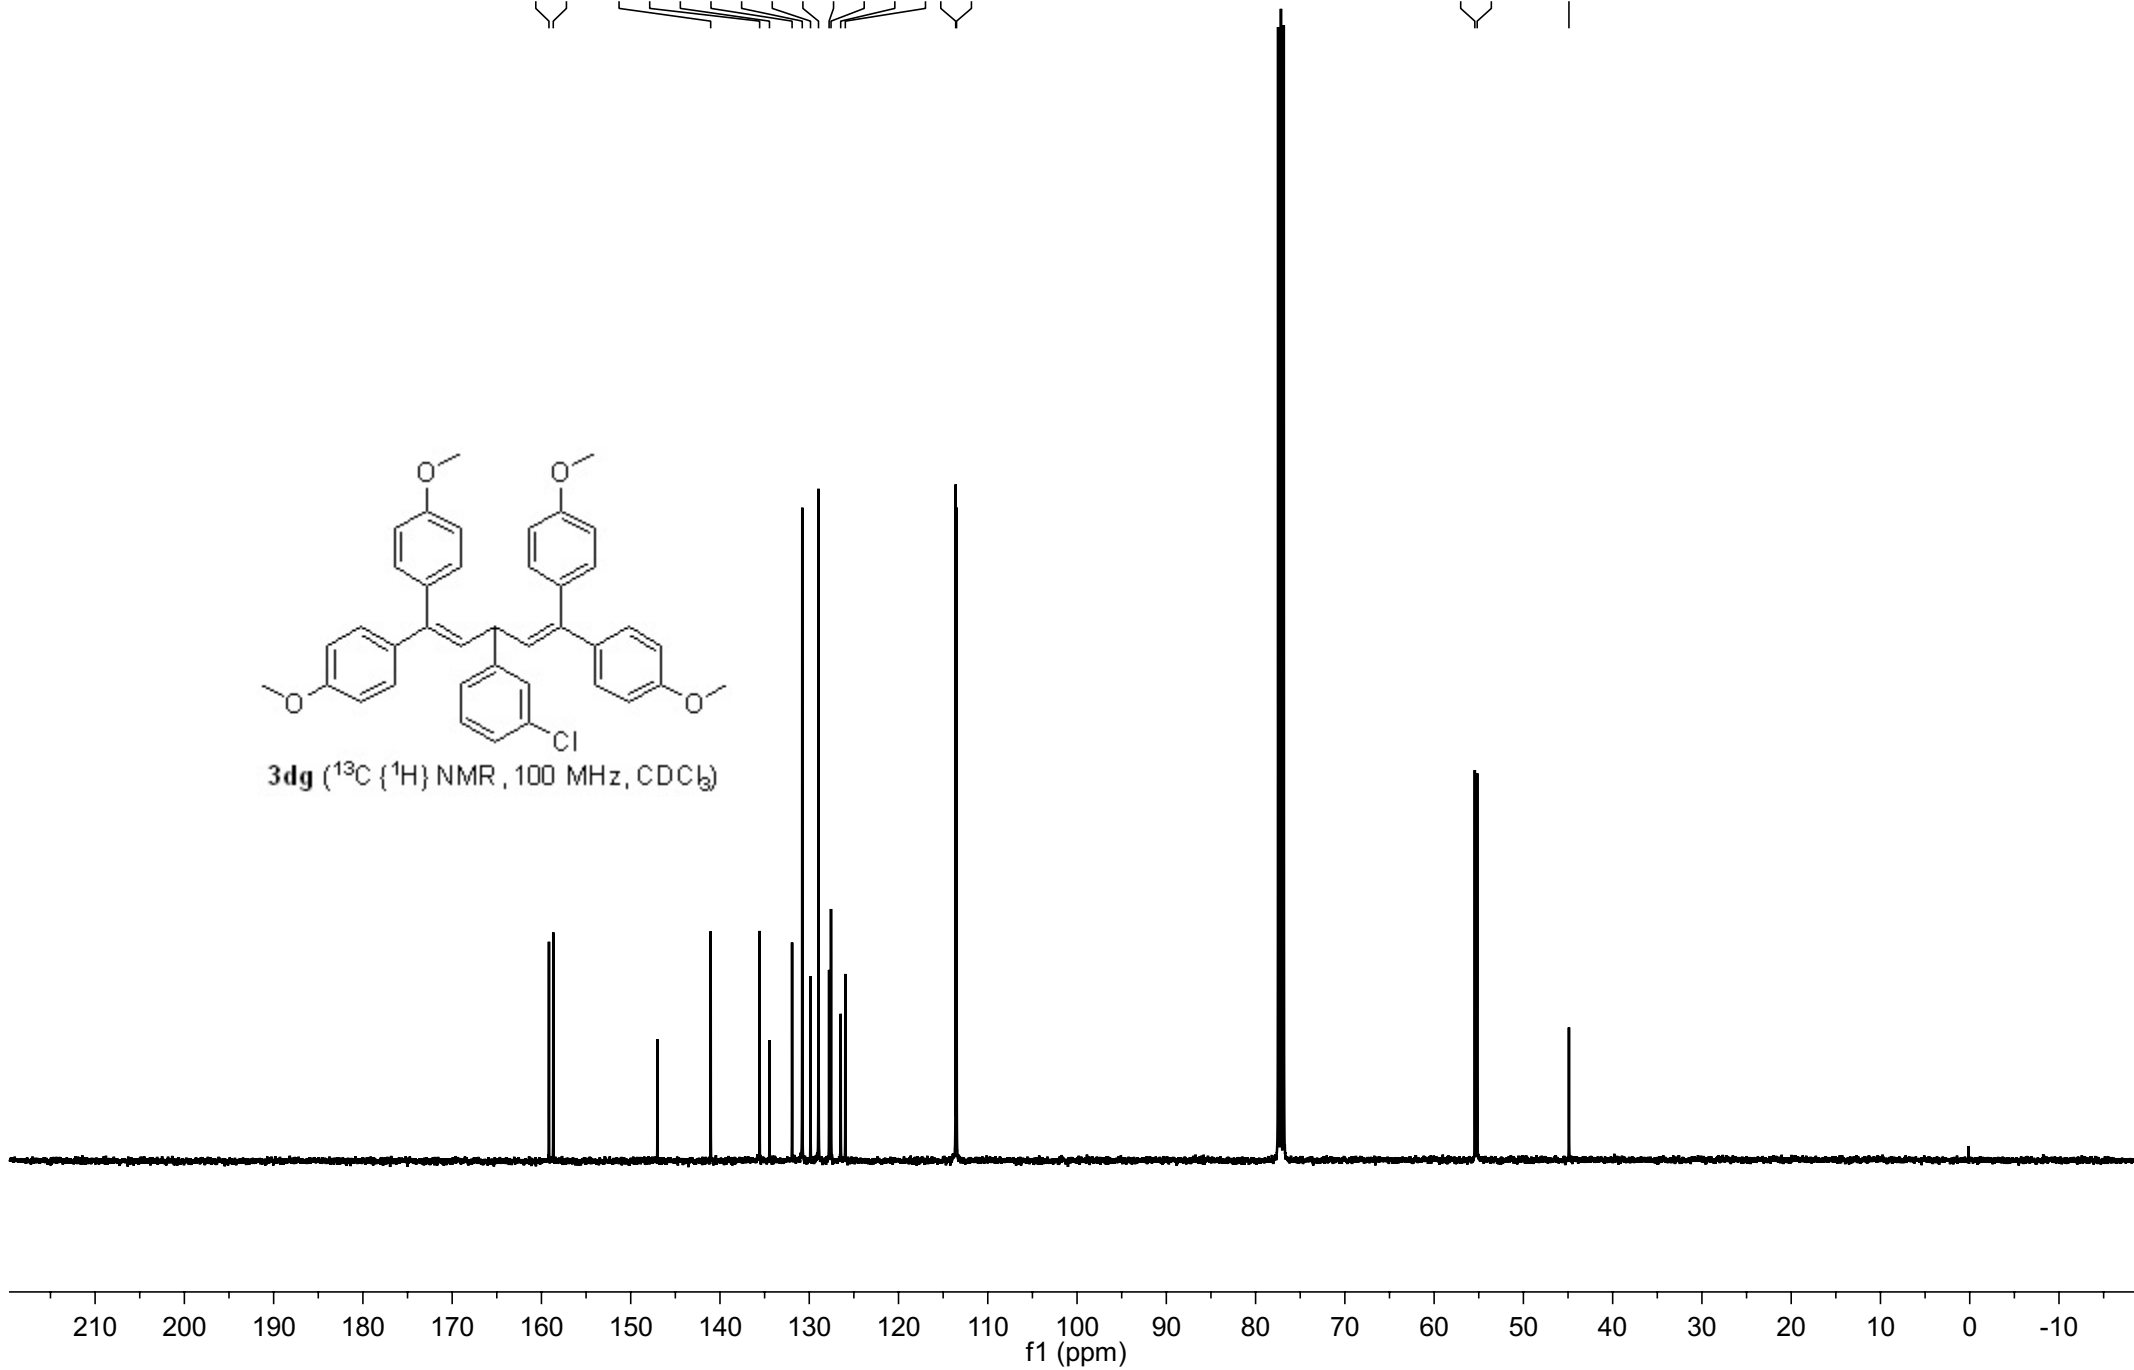

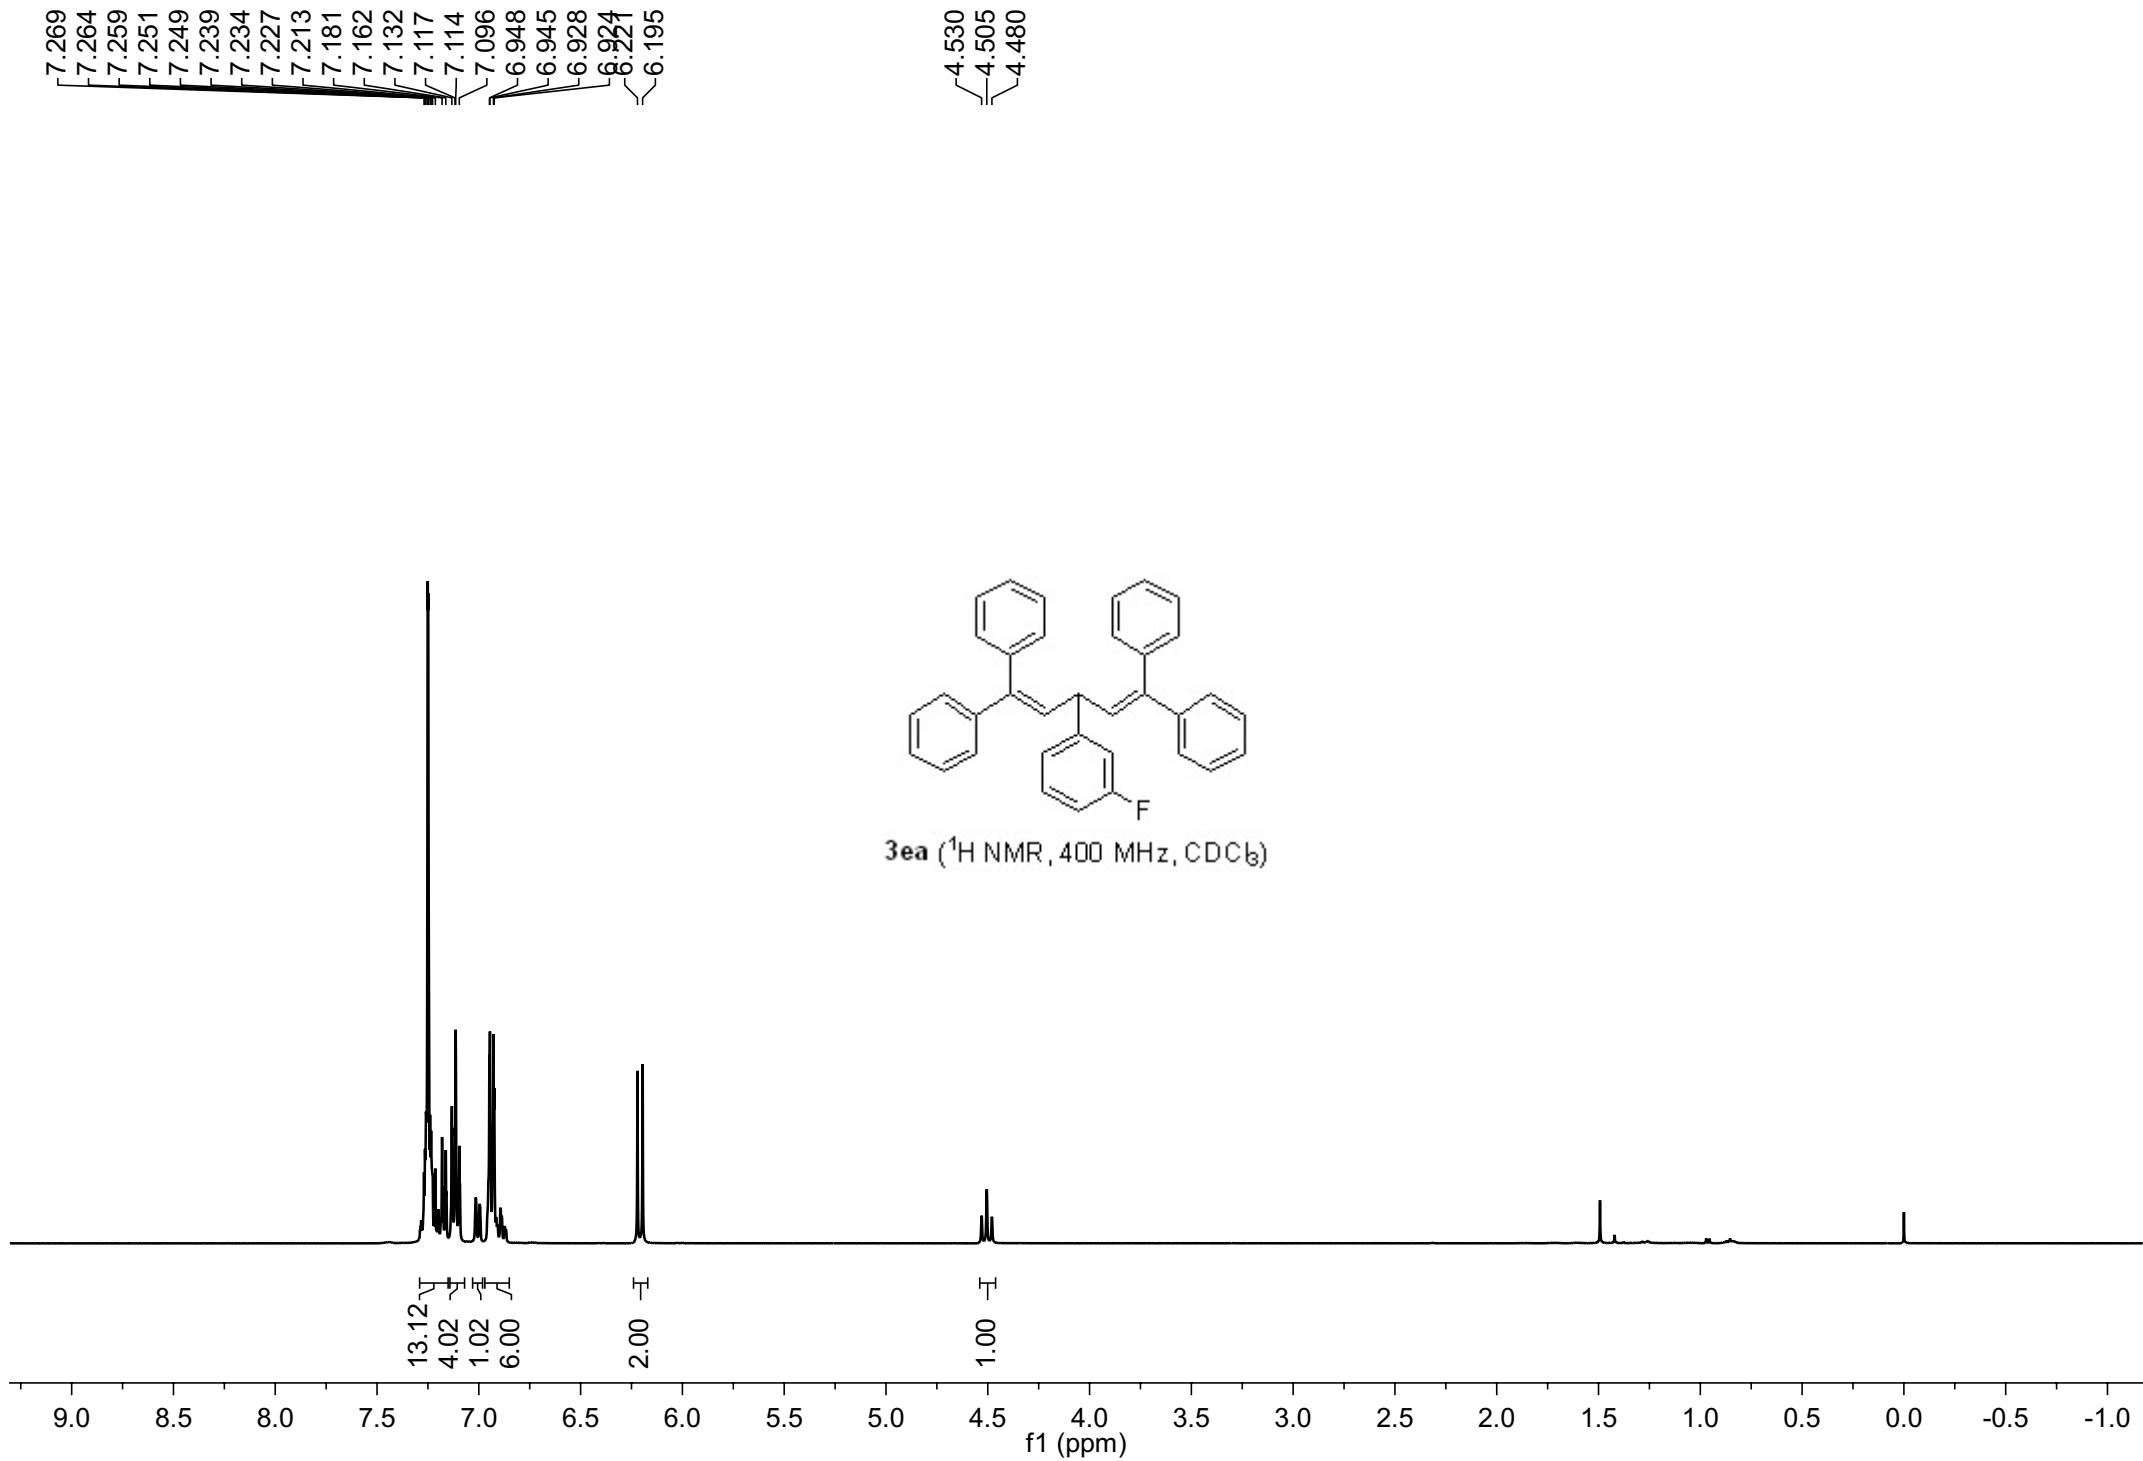



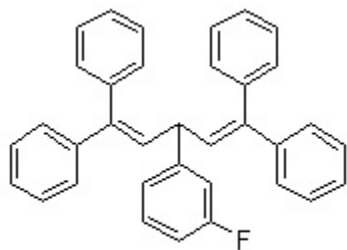

3ea (<sup>13</sup>C {<sup>1</sup>H} NMR, 100 MHz, CDCl<sub>3</sub>)

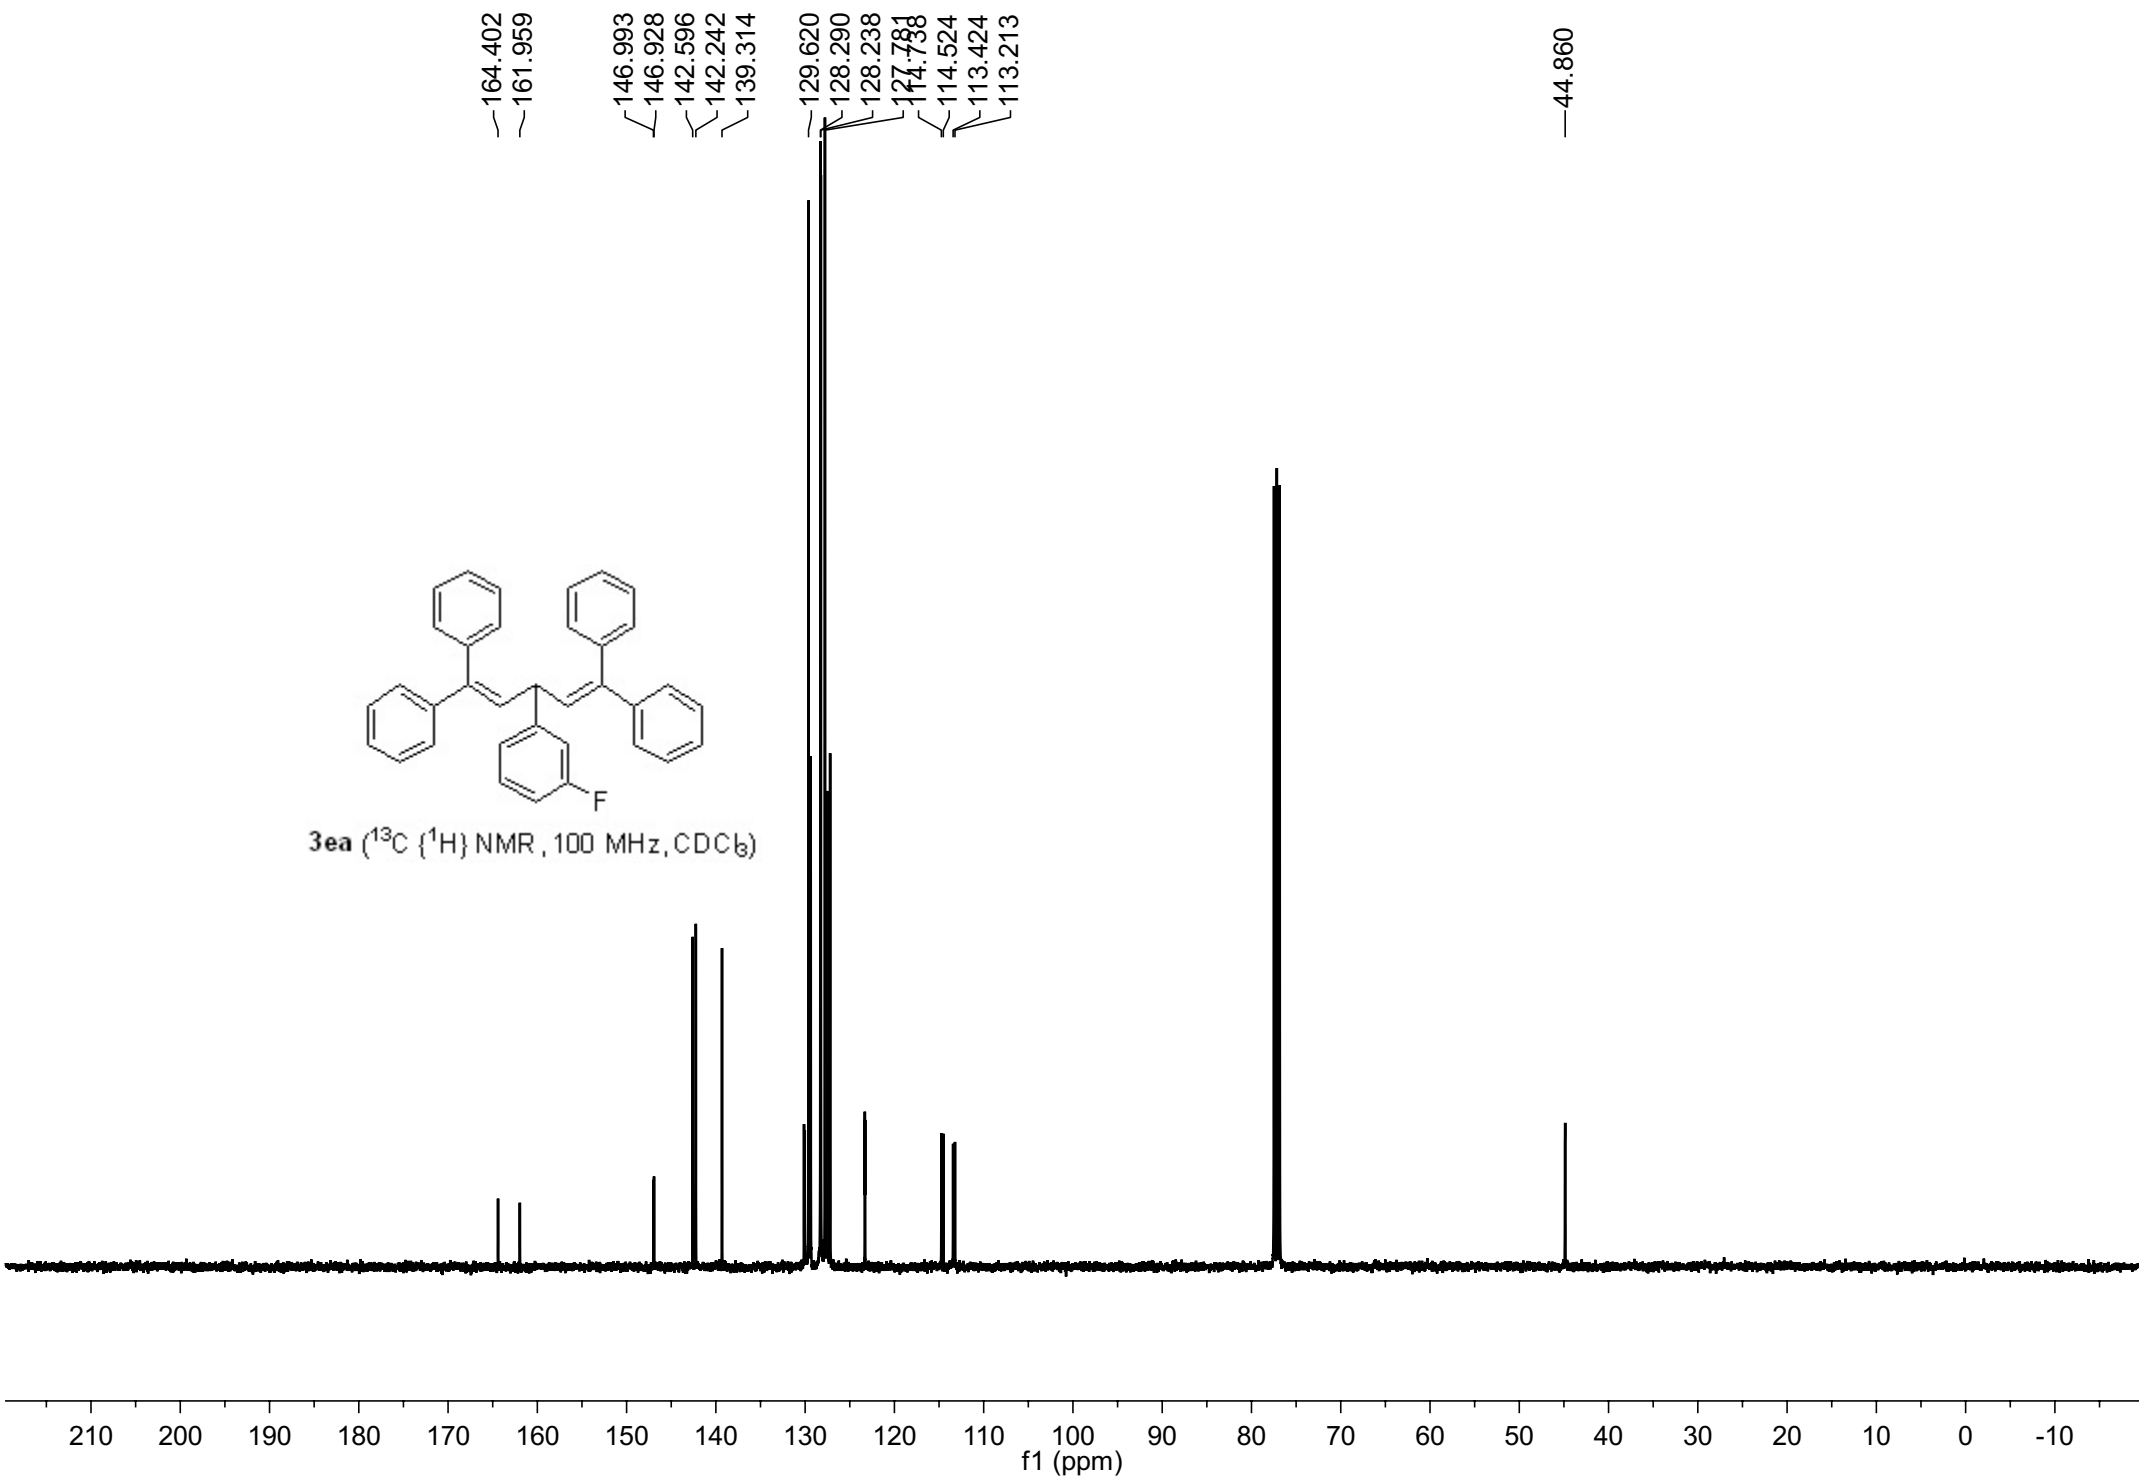

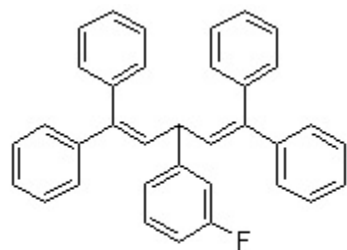

3ea ( $^{19}\text{F}$  NMR, 376 MHz,  $\text{CDCl}_3$ )

---112.732

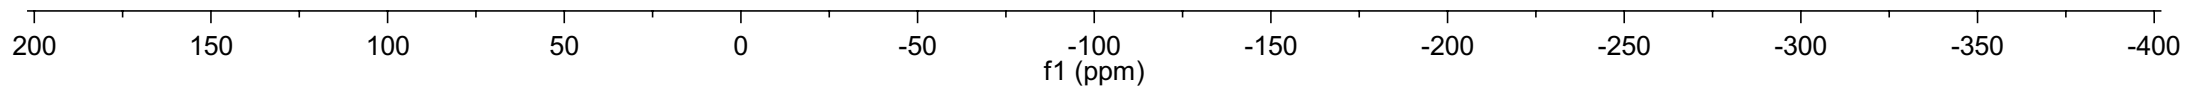

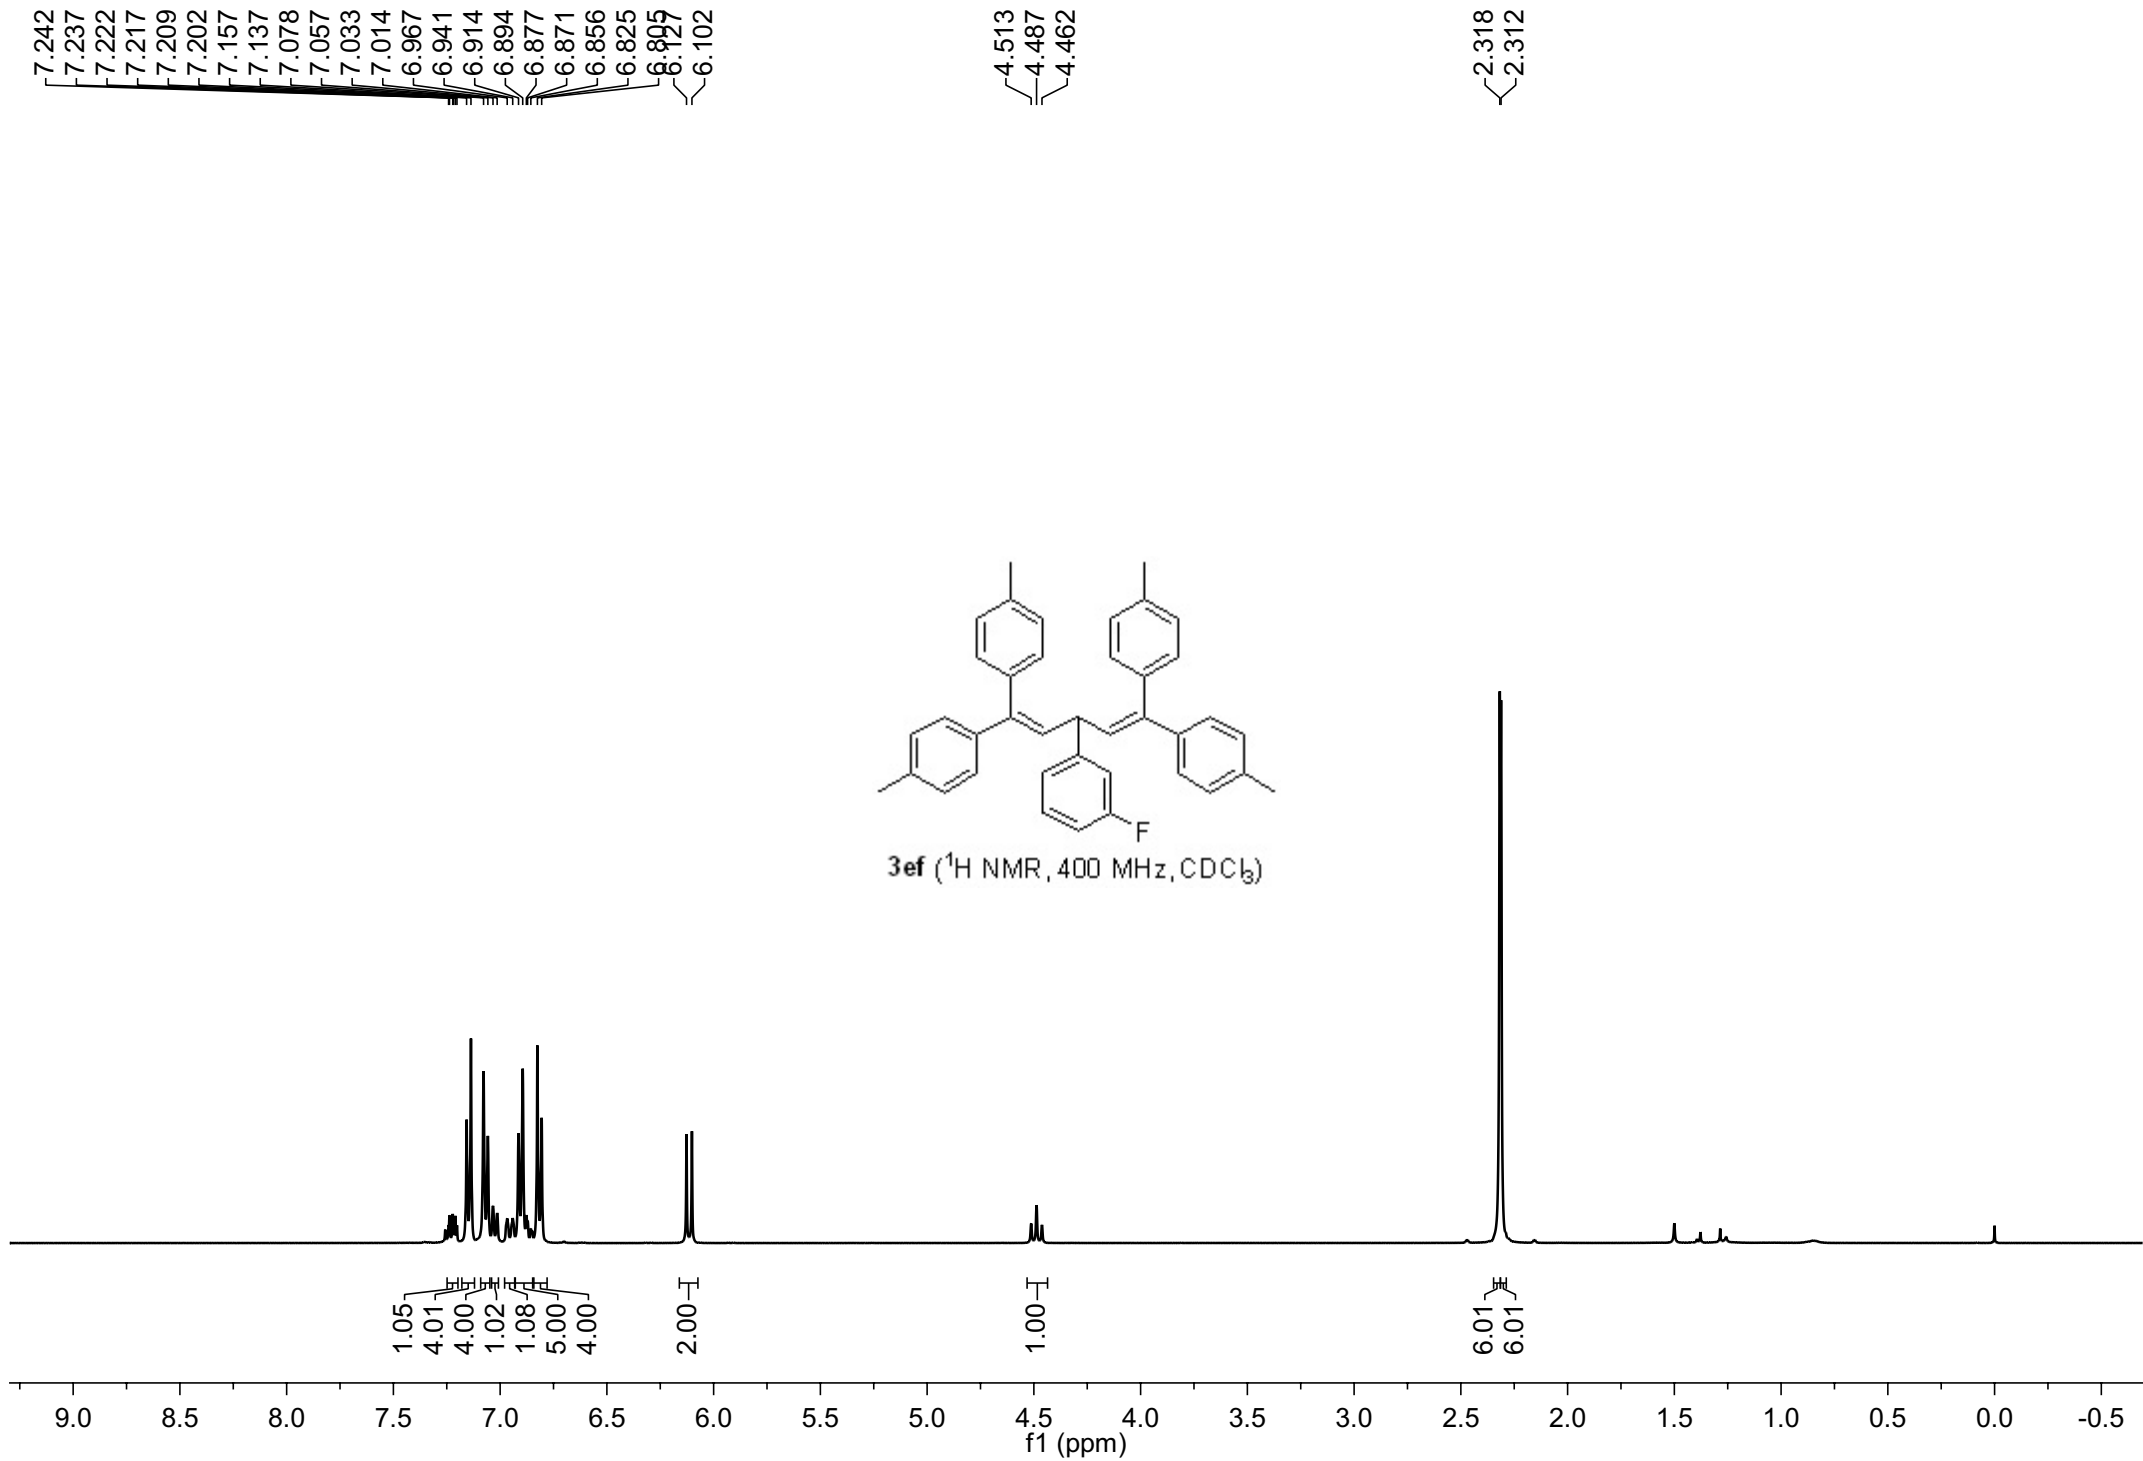

~ 164.387  
 ~ 161.947  
 141.849  
 140.035  
 137.182  
 136.592  
 136.513  
 129.528  
 128.948  
 128.788  
 128.500  
 127.689  
 123.323  
 114.773  
 114.559  
 113.248  
 113.037

— 44.833

{ 21.342  
 { 21.222

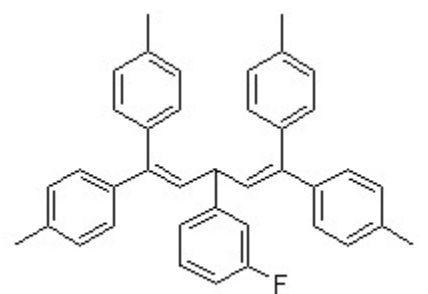

3ef ( $^{13}\text{C}$  { $^1\text{H}$ } NMR, 100 MHz,  $\text{CDCl}_3$ )

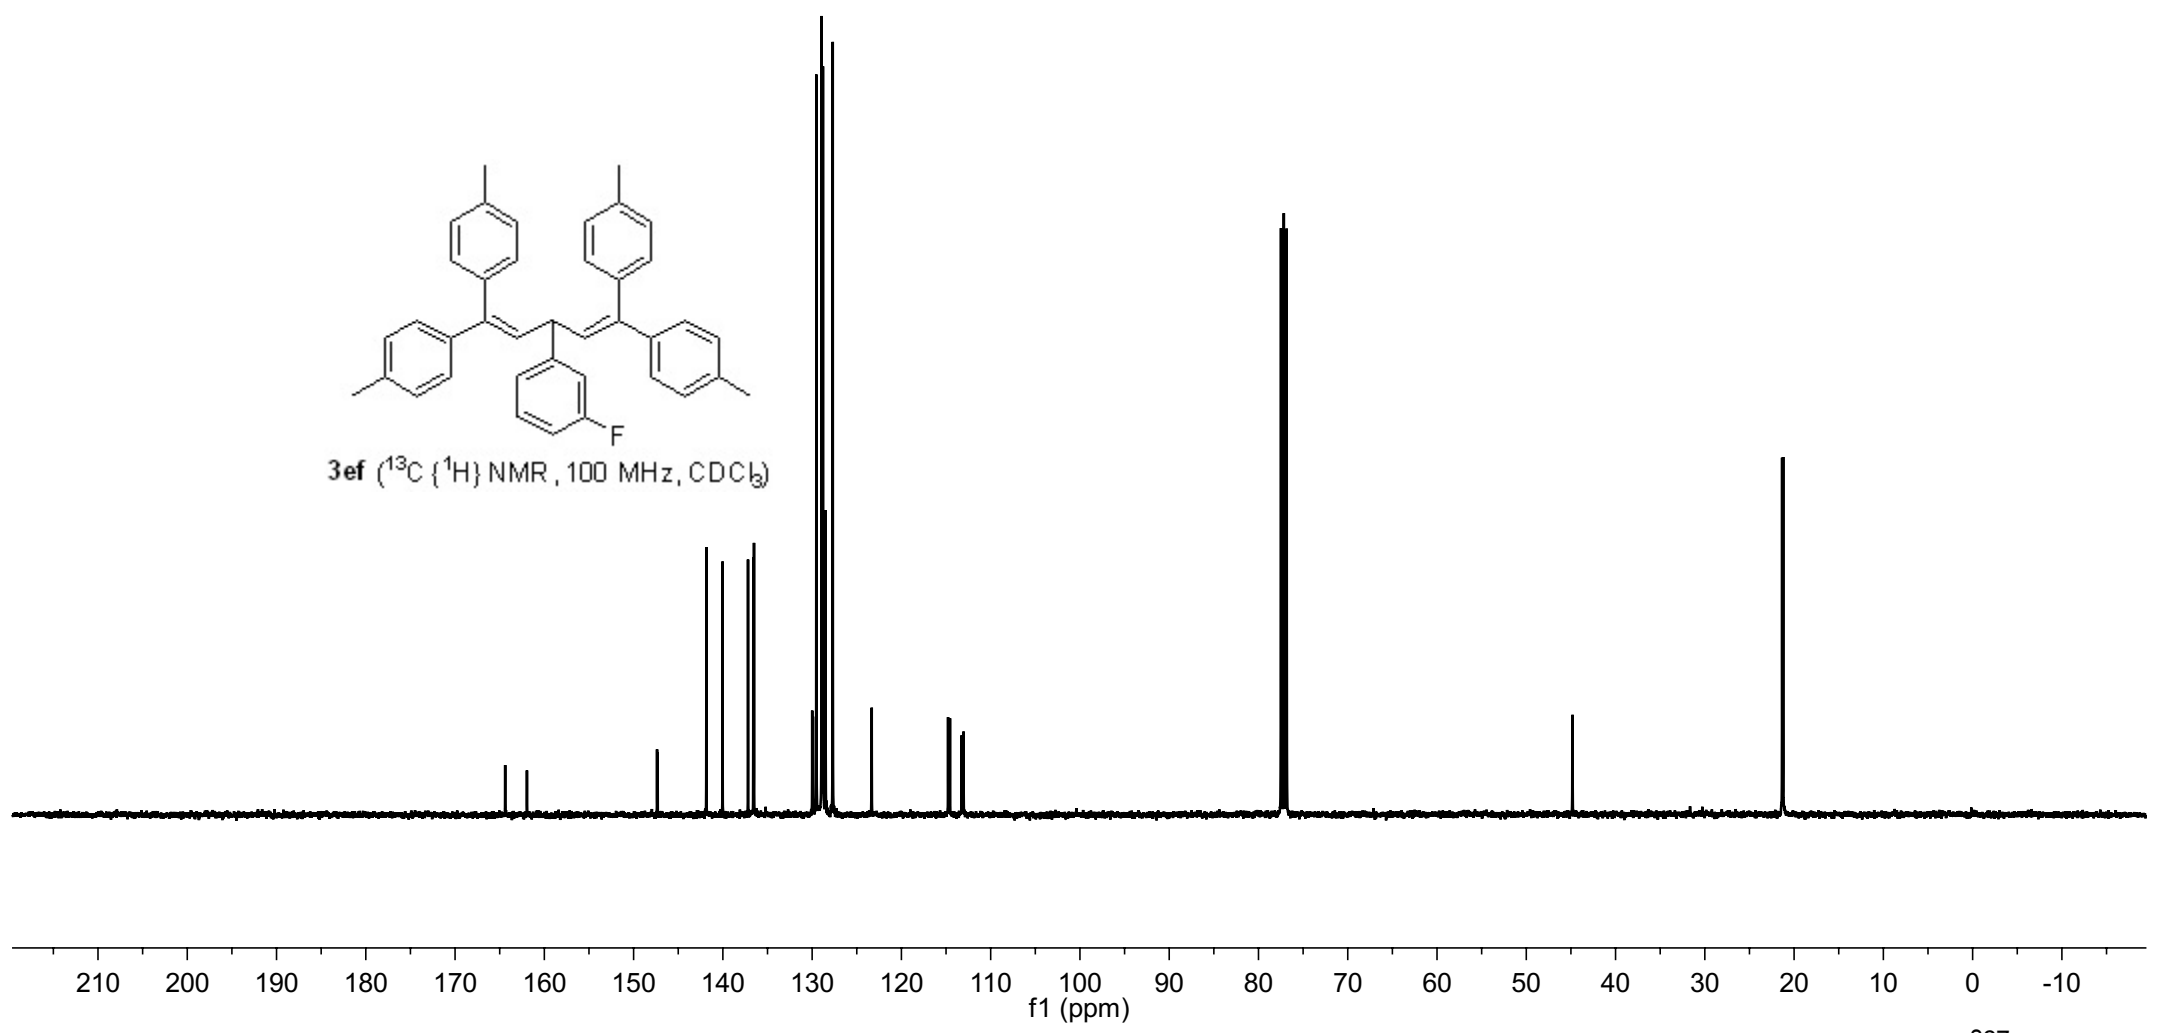

-112.981  
-113.028

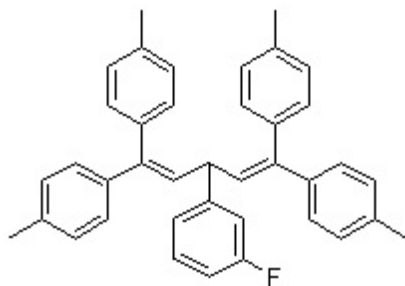

3ef ( $^{19}\text{F}$  NMR, 376 MHz,  $\text{CDCl}_3$ )

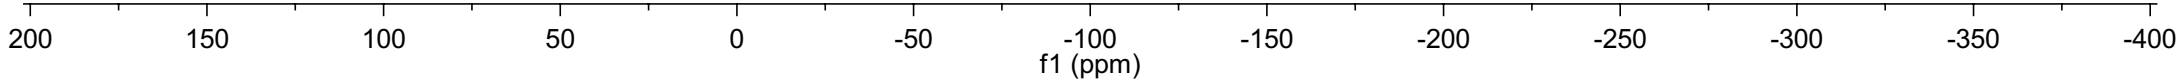

7.258  
7.255  
7.246  
7.241  
7.233  
7.223  
7.176  
7.167  
7.158  
7.131  
7.116  
7.113  
7.095  
6.969  
6.947  
6.938  
6.921  
6.917  
6.912  
6.196

4.494  
4.469  
4.444

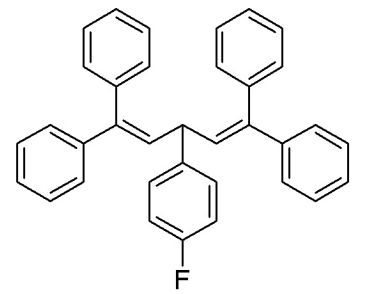

3fa (<sup>1</sup>H NMR, 400 MHz, CDCl<sub>3</sub>)

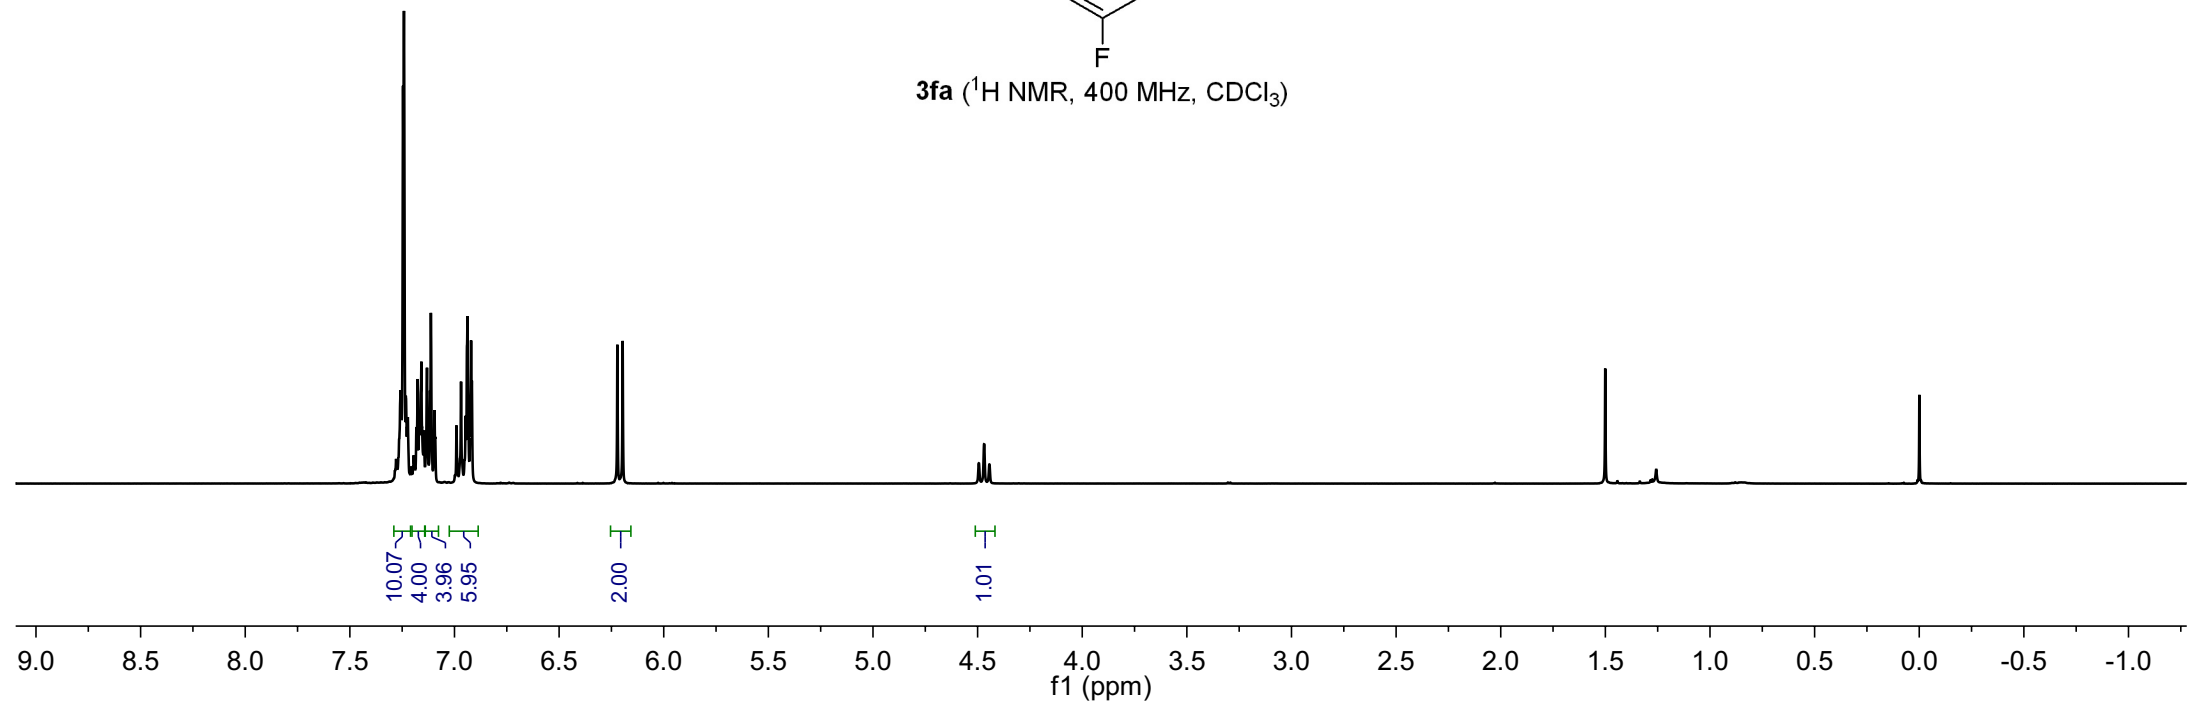

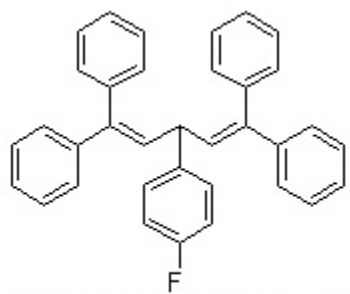

3fa (<sup>13</sup>C {<sup>1</sup>H} NMR, 100 MHz, CDCl<sub>3</sub>)

- 162.833
- 160.403
- 142.677
- 141.878
- 140.004
- 139.973
- 139.401
- 129.640
- 128.281
- 128.212
- 127.769
- 115.551
- 115.342

44.376

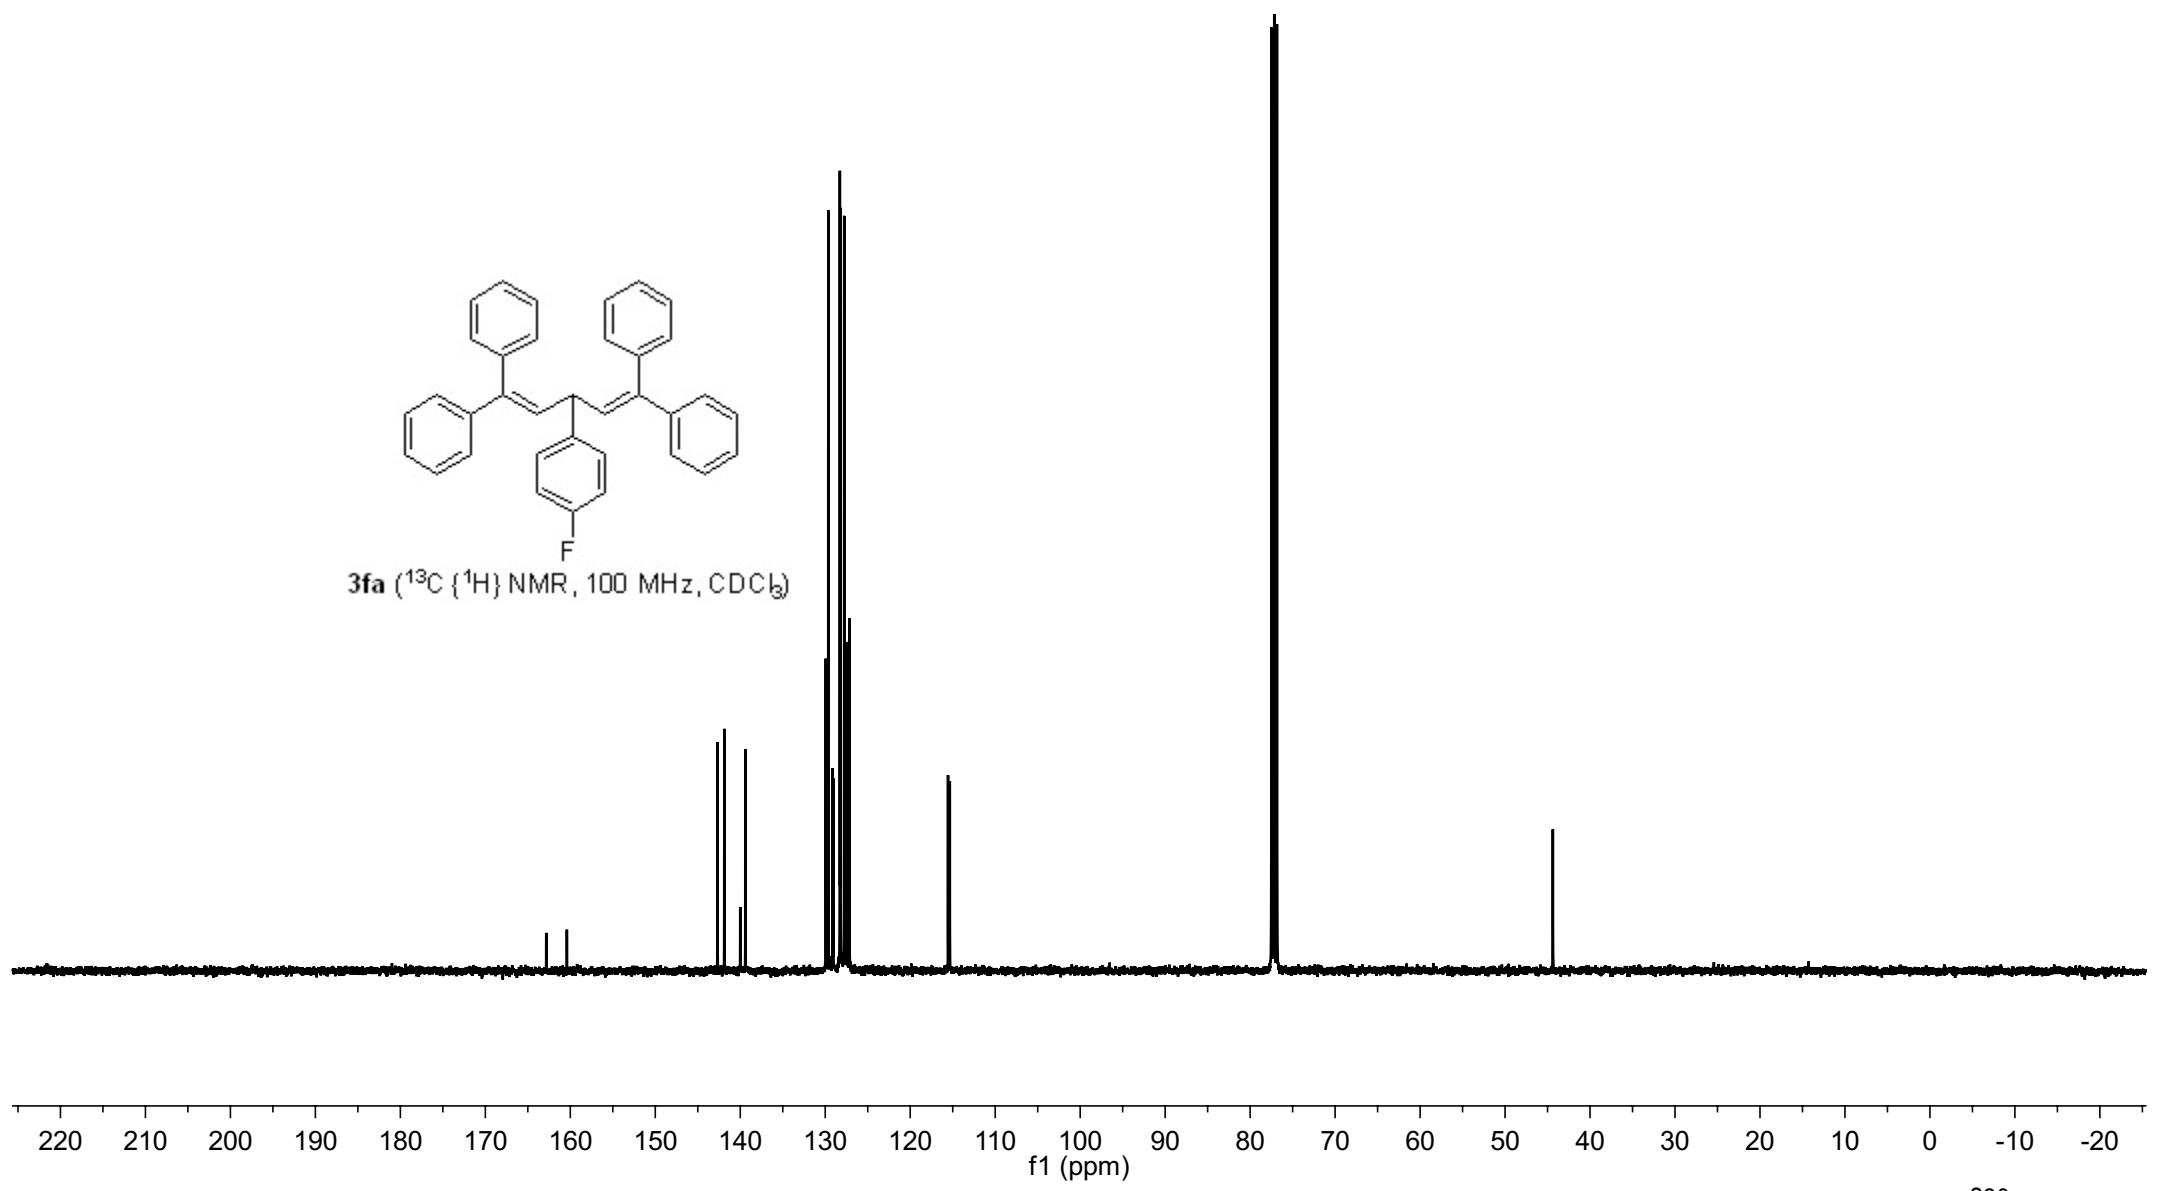

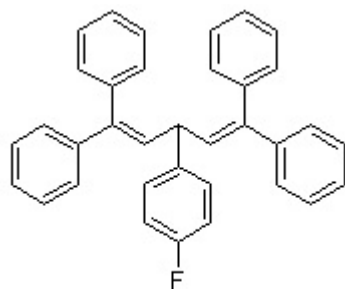

3fa ( $^{19}\text{F}$  NMR, 376 MHz,  $\text{CDCl}_3$ )

-116.884

200 150 100 50 0 -50 -100 -150 -200 -250 -300 -350 -400  
f1 (ppm)



7.220  
7.212  
7.196  
7.191  
7.177  
7.156  
7.136  
7.079  
7.060  
6.987  
6.965  
6.943  
6.912  
6.892  
6.823  
6.804  
6.126  
6.100

4.495  
4.469  
4.444

2.320  
2.312

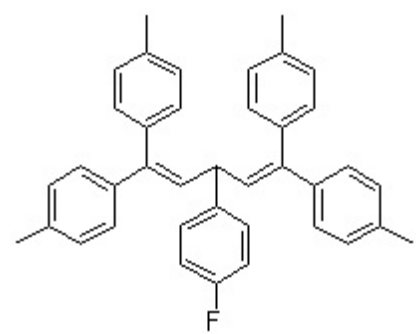

3ff (<sup>1</sup>H NMR, 400 MHz, CDCl<sub>3</sub>)

6.16  
4.01  
2.00  
3.99  
4.00

2.01

1.00

6.00  
5.83

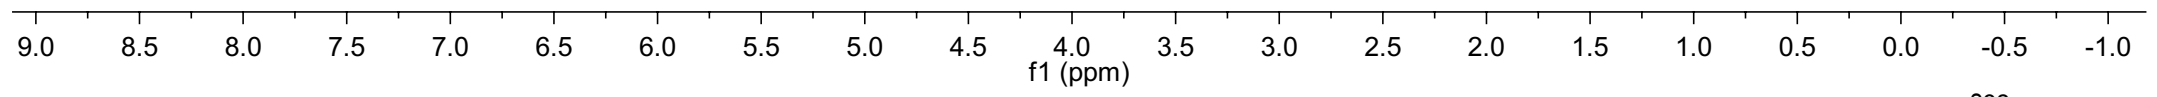

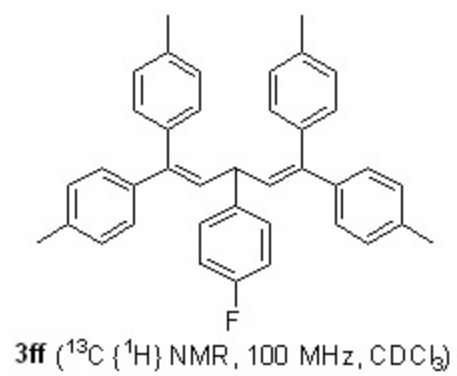

162.752  
 160.324  
 141.454  
 140.097  
 137.133  
 136.636  
 136.472  
 129.530  
 129.016  
 128.935  
 128.756  
 127.681  
 115.205

44.269

21.347  
21.227

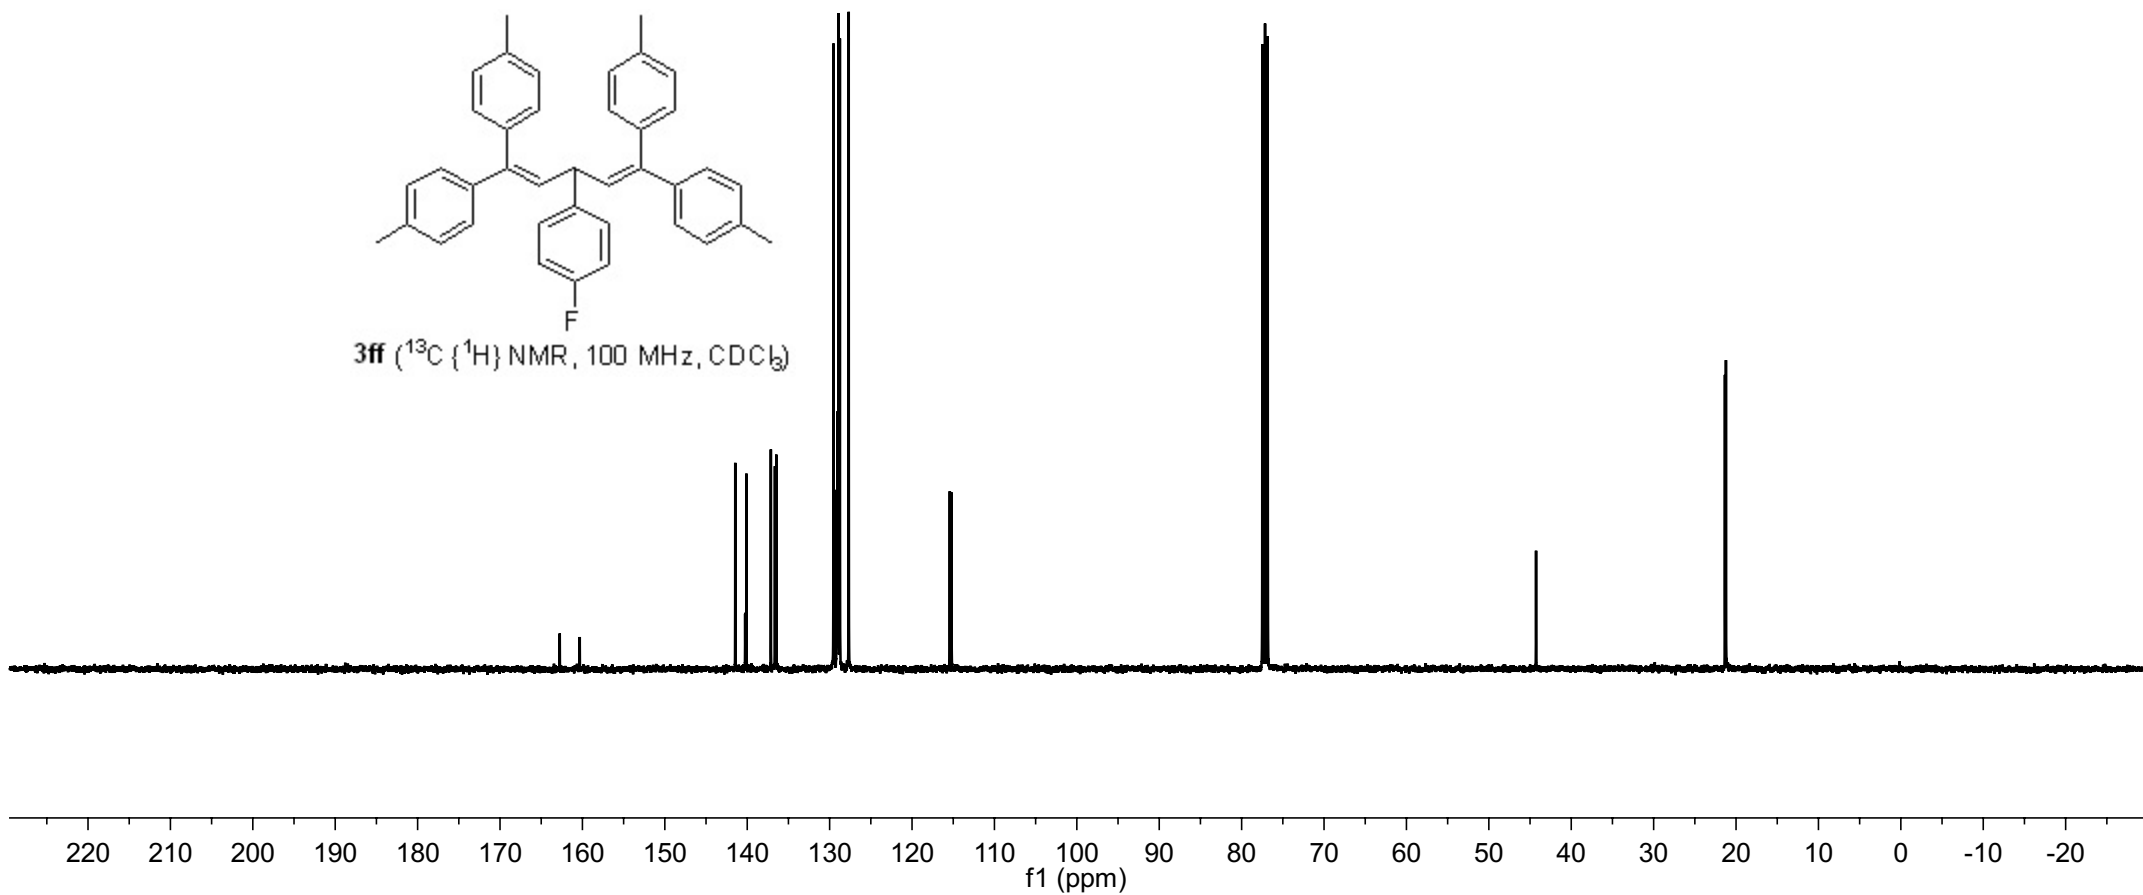

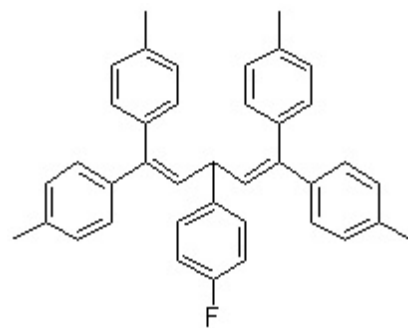

3ff ( $^{19}\text{F}$  NMR, 376 MHz,  $\text{CDCl}_3$ )

-117.183

200 150 100 50 0 -50 -100 -150 -200 -250 -300 -350 -400  
f1 (ppm)

7.528  
7.508  
7.417  
7.398  
7.312  
7.293  
7.271  
7.265  
7.215  
7.197  
7.187  
7.170  
7.155  
7.151  
7.087  
6.972  
6.955  
6.947  
6.323

4.771  
4.747  
4.723

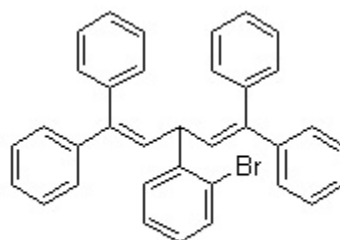

**3ga** ( $^1\text{H NMR}$ , 400 MHz,  $\text{CDCl}_3$ )

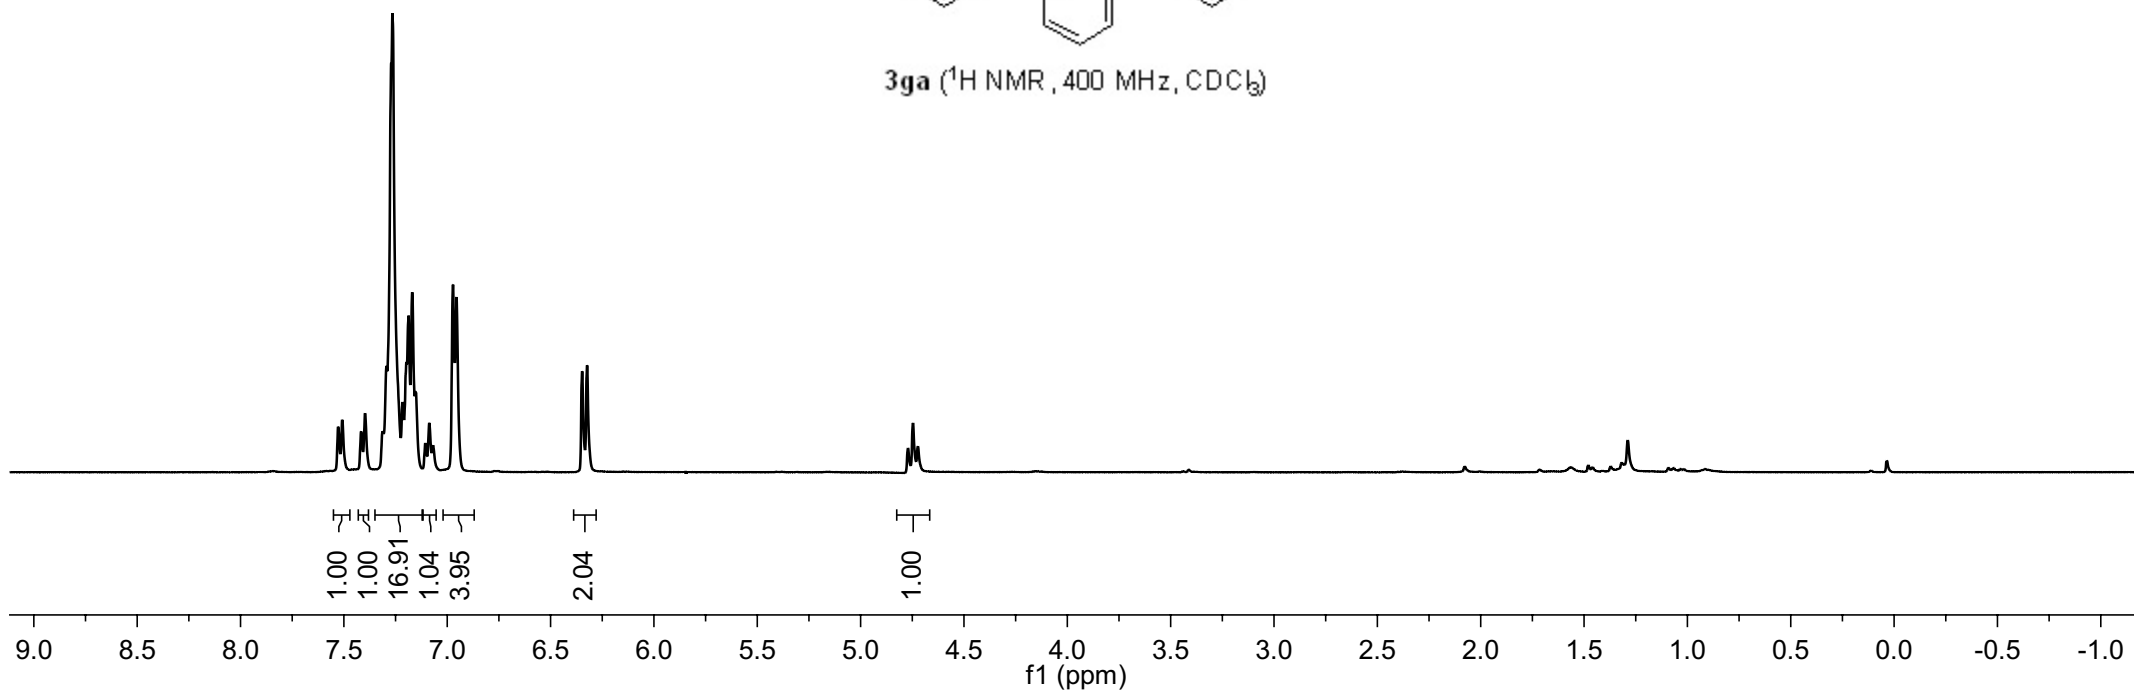

144.757  
142.803  
142.322  
139.442  
133.454  
130.105  
129.918  
129.678  
128.217  
128.078  
127.837  
127.772  
127.387  
127.121  
123.928

—45.562

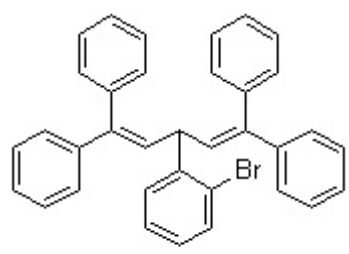

3ga (<sup>13</sup>C {<sup>1</sup>H} NMR, 100 MHz, CDCl<sub>3</sub>)

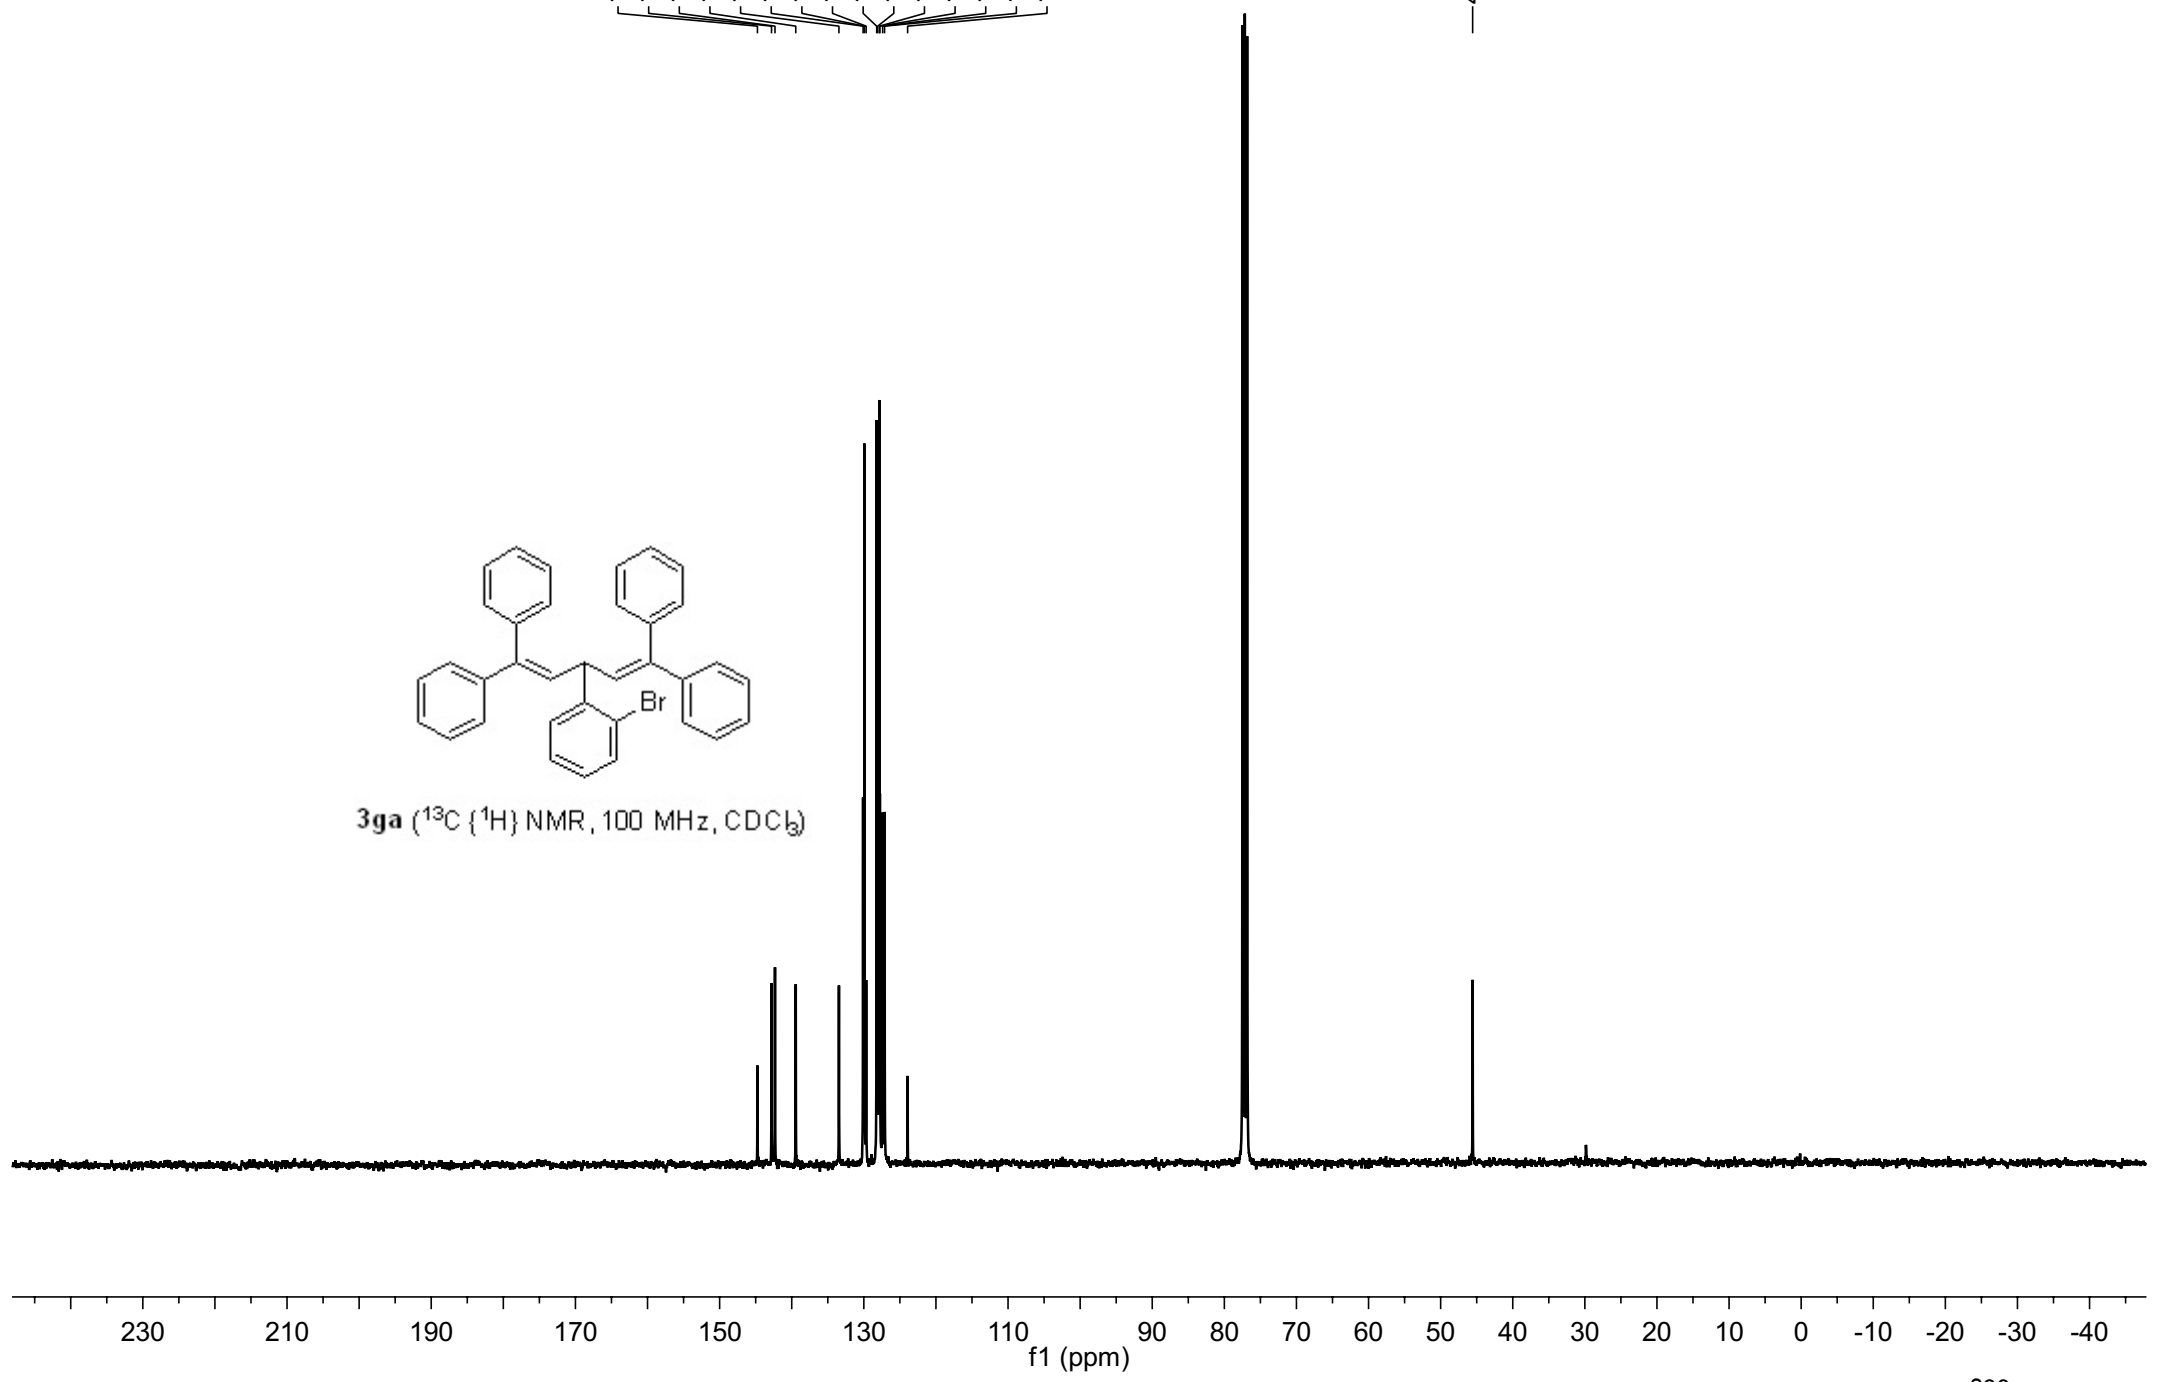

7.550  
7.531  
7.430  
7.411  
7.315  
7.297  
7.287  
7.175  
7.155  
7.112  
7.092  
6.983  
6.964  
6.865  
6.846  
6.268  
6.244

4.763  
4.739  
4.715

2.366  
2.354

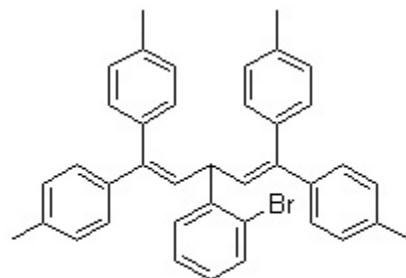

3gf (<sup>1</sup>H NMR, 400 MHz, CDCl<sub>3</sub>)

1.01  
1.00  
1.00  
9.07  
4.00  
3.99

2.00

1.00

6.09  
5.86

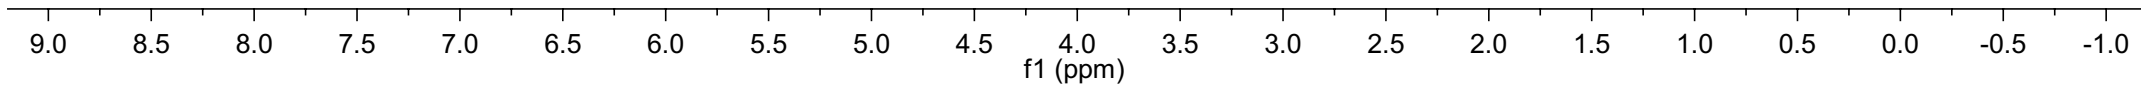

145.048  
141.872  
140.332  
137.021  
136.649  
136.407  
133.419  
129.820  
129.737  
129.219  
128.865  
128.616  
127.770  
127.667  
124.022

—45.597

21.370  
21.210

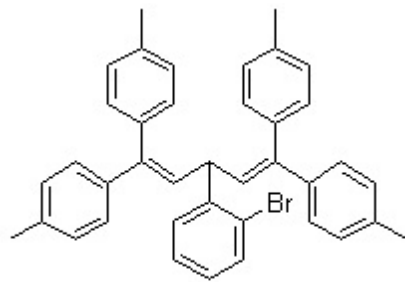

3gf ( $^{13}\text{C}$  { $^1\text{H}$ } NMR, 100 MHz,  $\text{CDCl}_3$ )

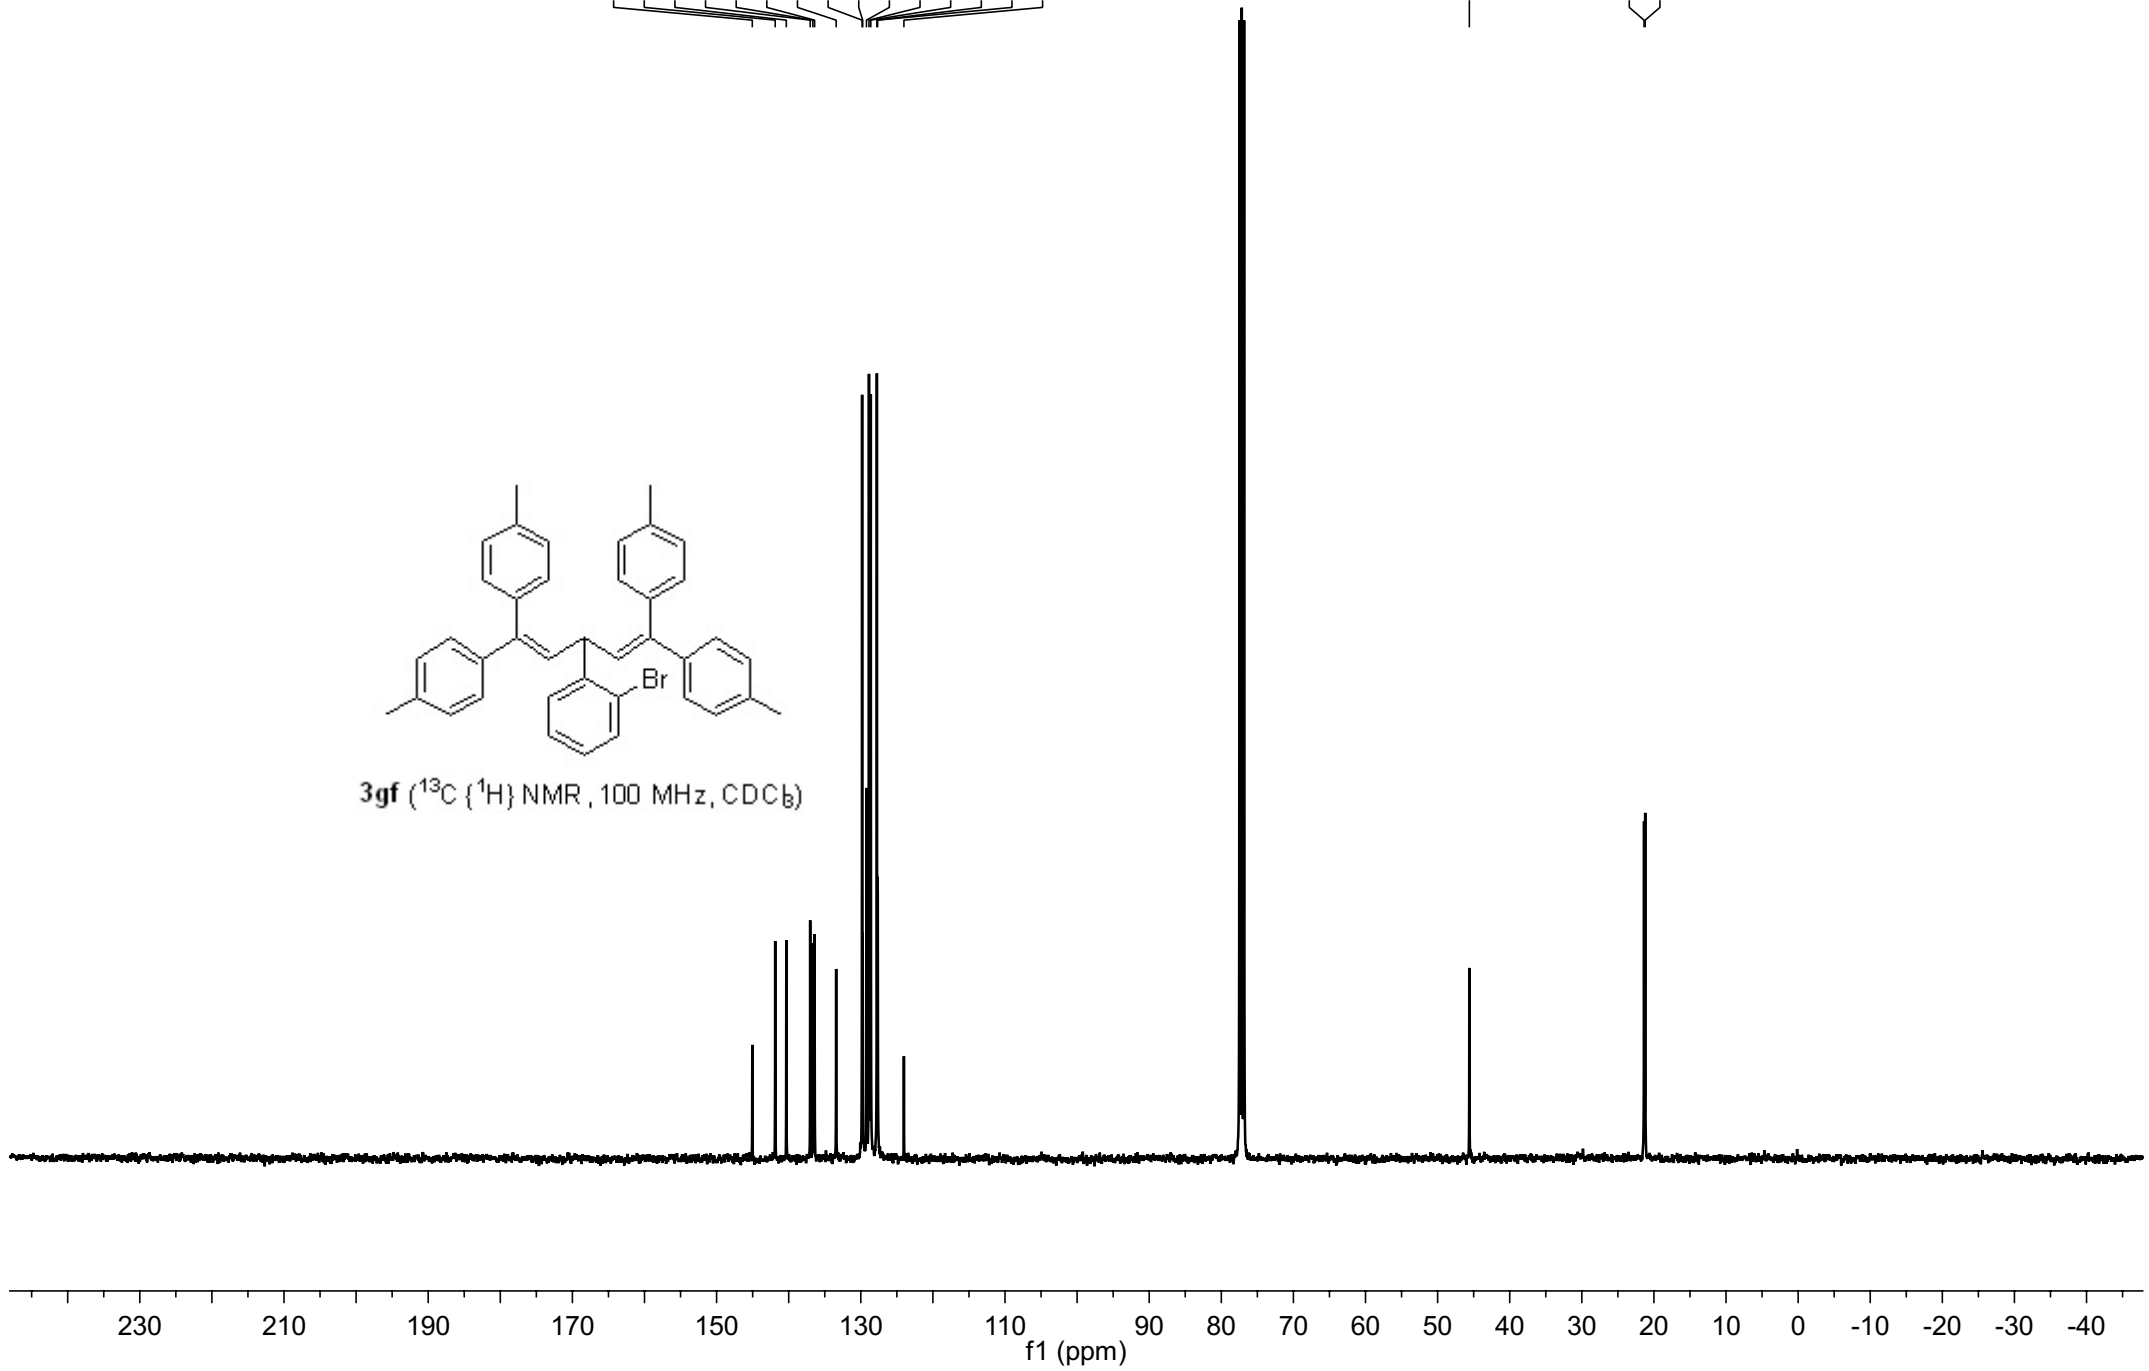

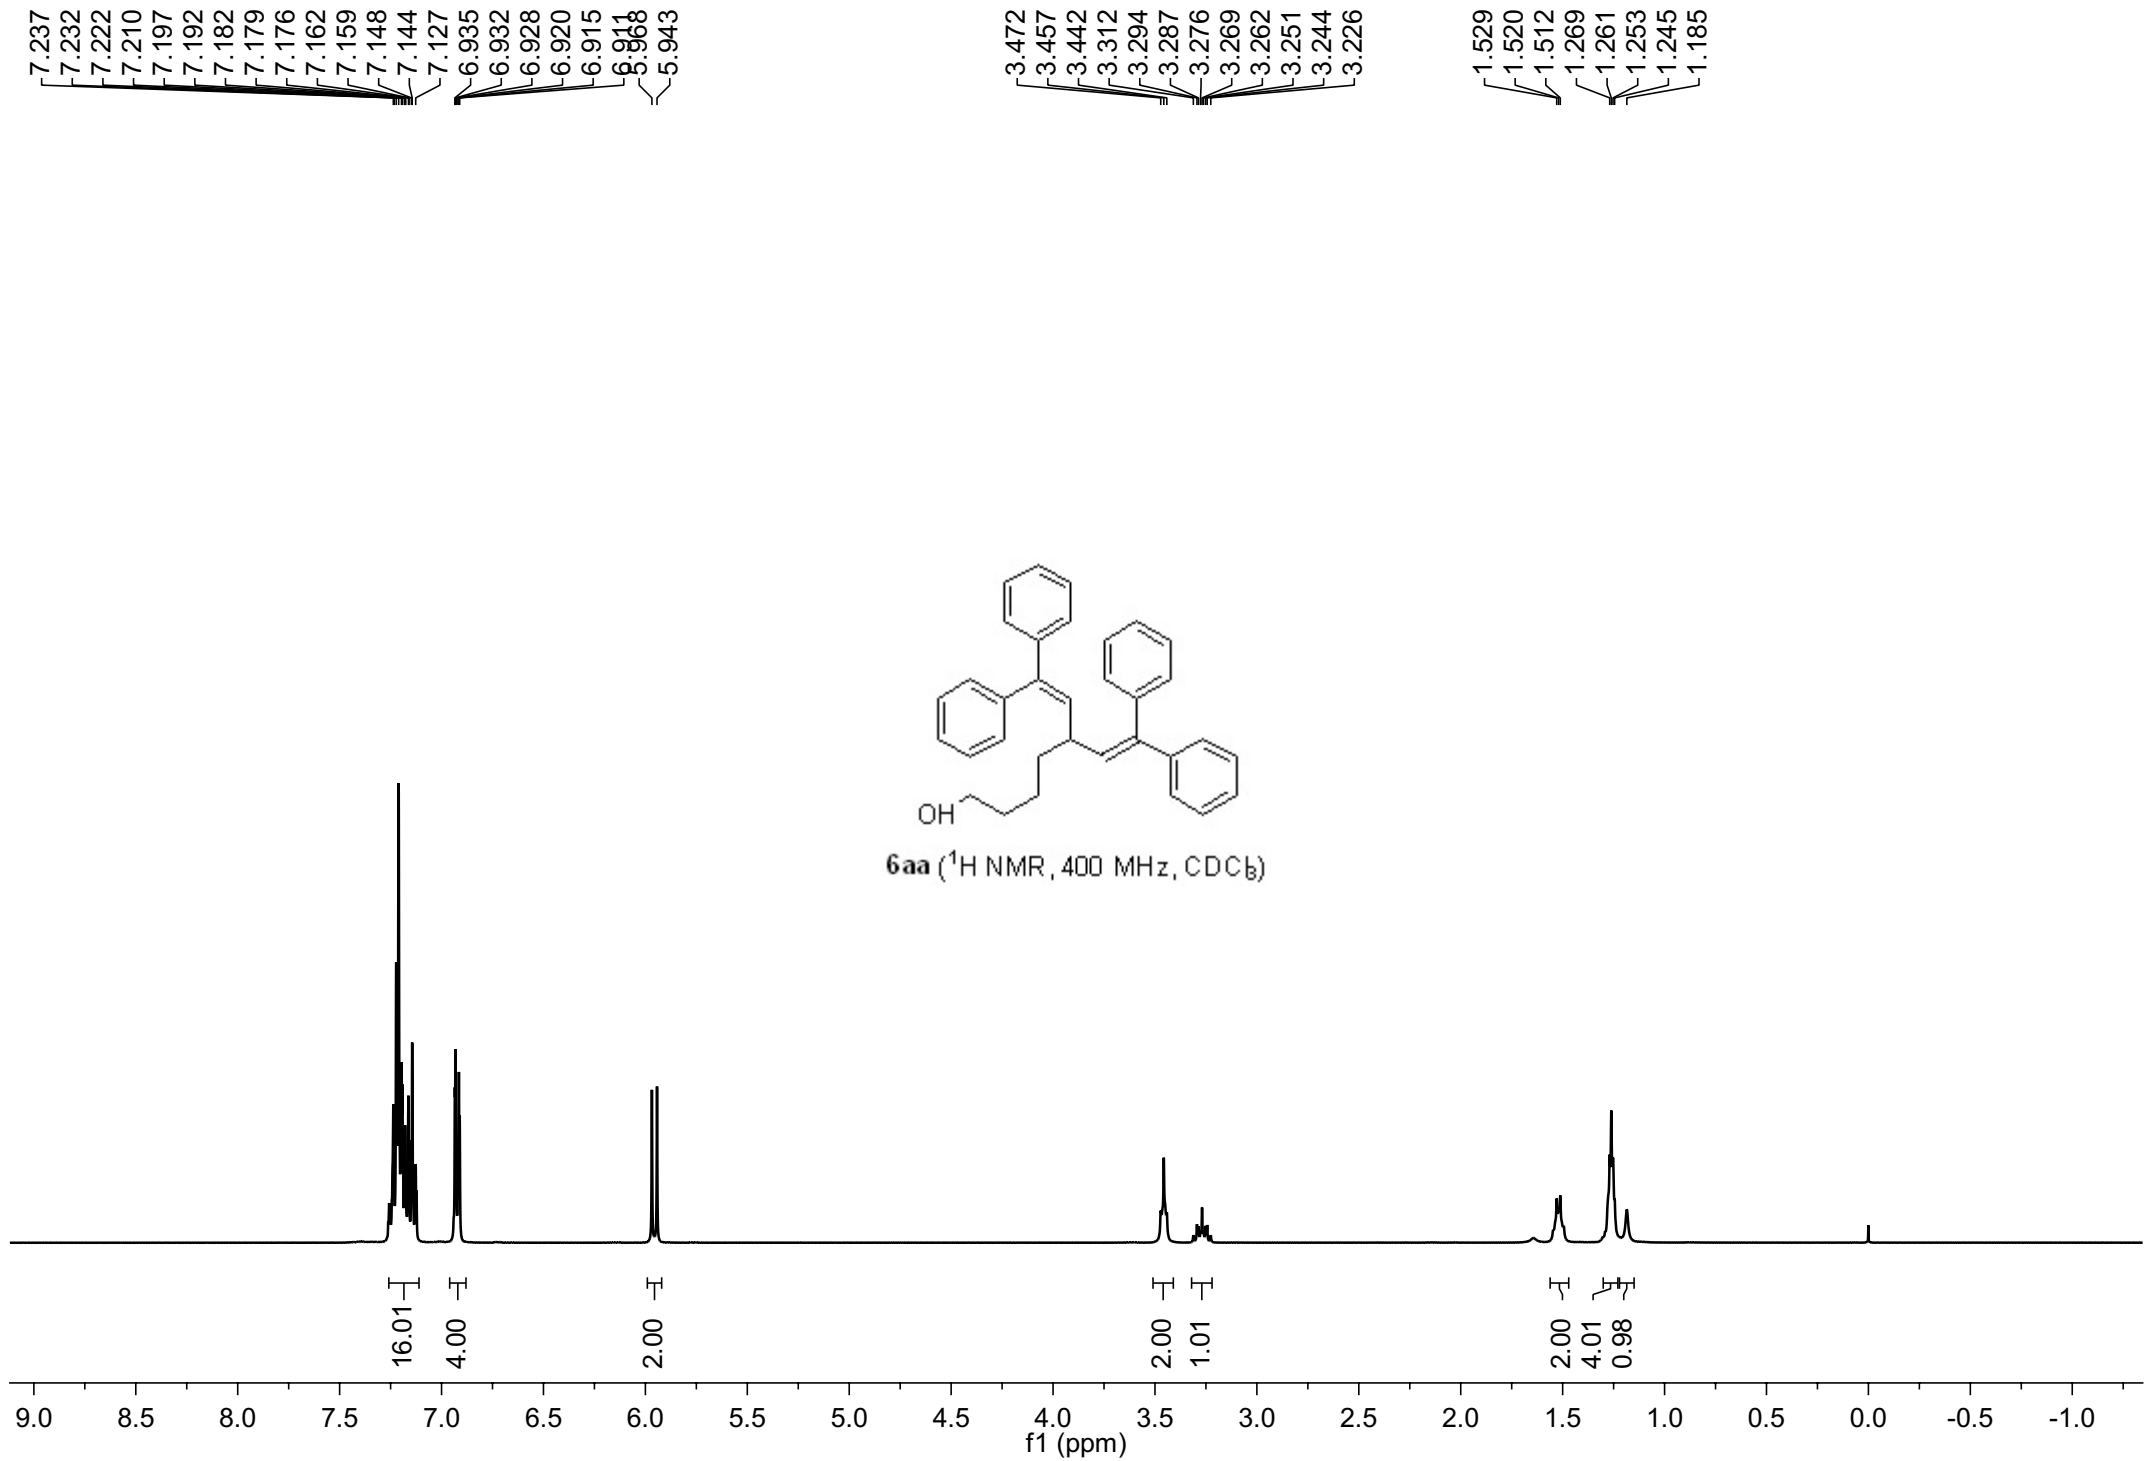



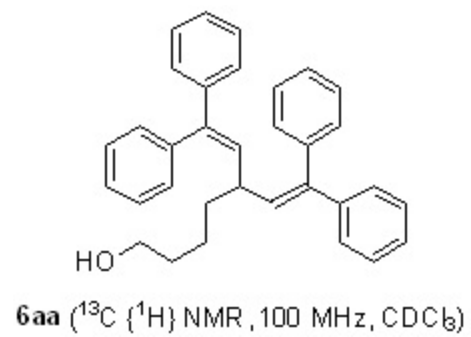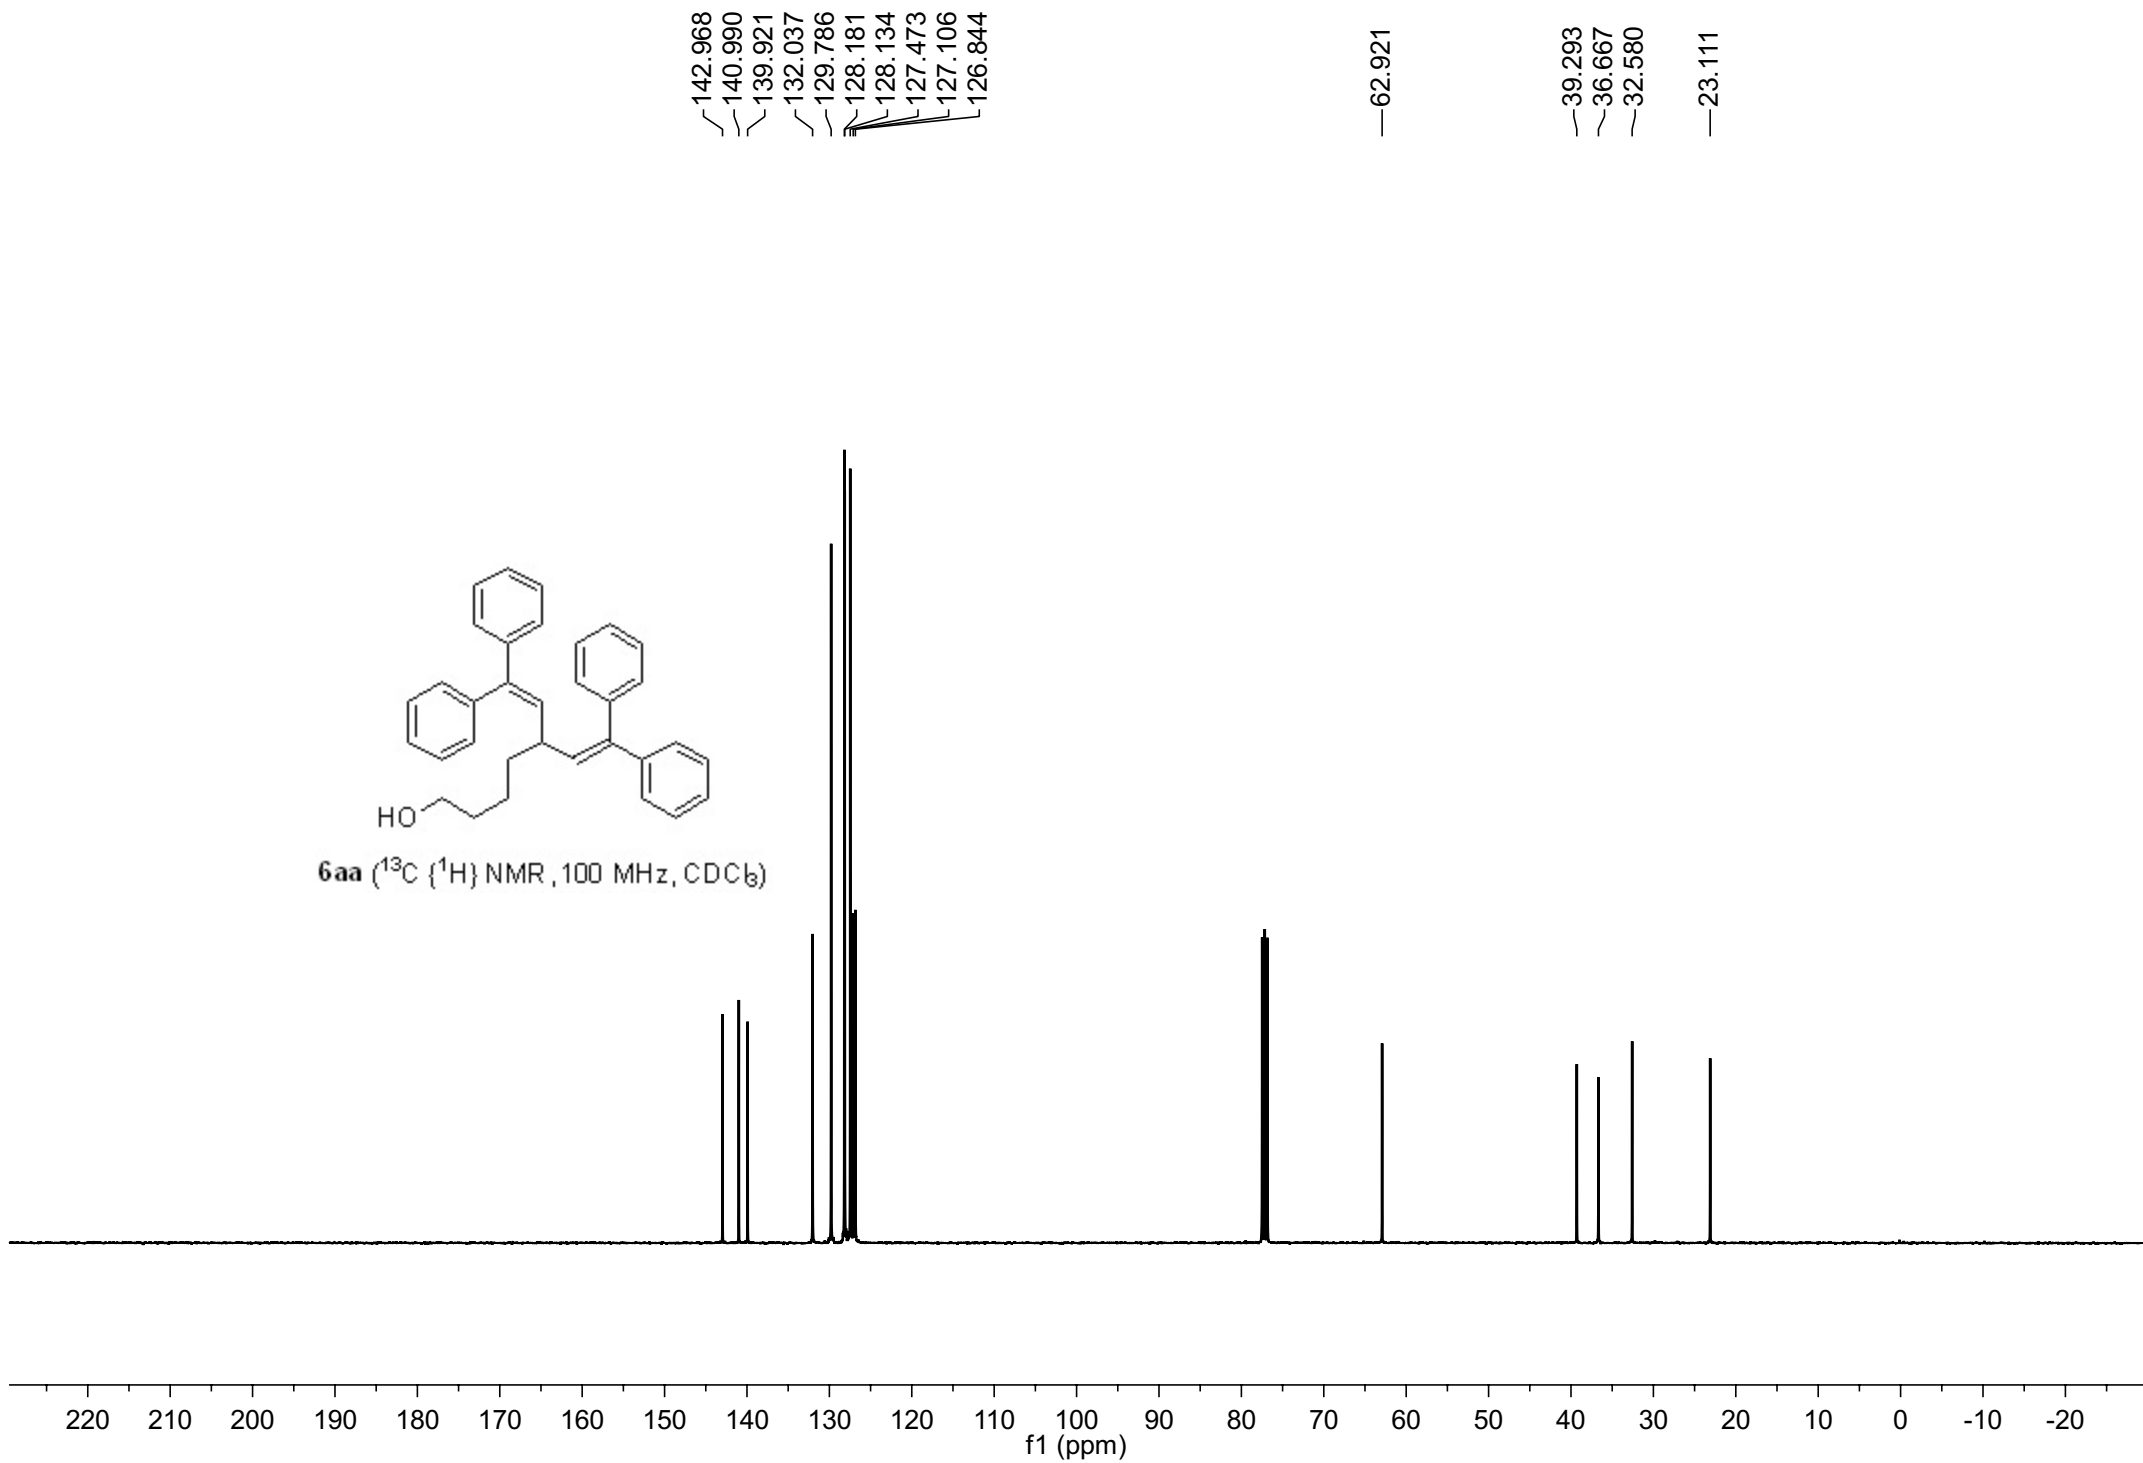

7.109  
7.089  
7.044  
7.023  
6.936  
6.916  
6.804  
6.785

5.877  
5.852

3.486  
3.472  
3.456  
3.292  
3.274  
3.267  
3.249  
3.231  
3.224  
3.206

2.330  
2.292

1.523  
1.505  
1.488  
1.471  
1.317  
1.286  
1.276  
1.261  
1.250  
1.230

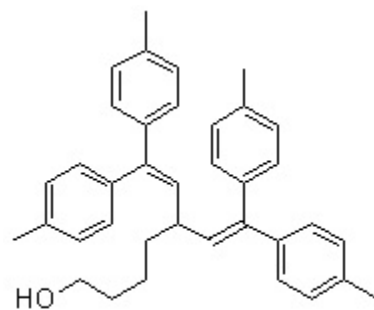

6af (<sup>1</sup>H NMR, 400 MHz, CDCl<sub>3</sub>)

4.02  
4.00  
4.00  
4.00

1.99

2.00  
1.00

5.93  
6.00

2.01  
3.99  
1.02

8.5 8.0 7.5 7.0 6.5 6.0 5.5 5.0 4.5 4.0 3.5 3.0 2.5 2.0 1.5 1.0 0.5 0.0 -0.5 -1.0

f1 (ppm)

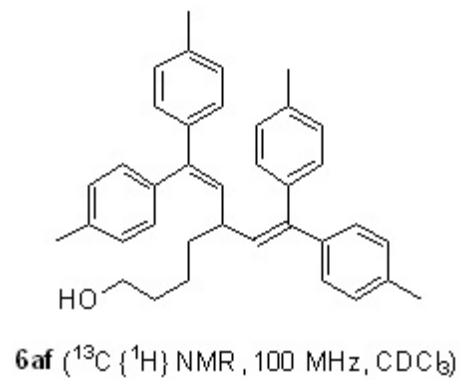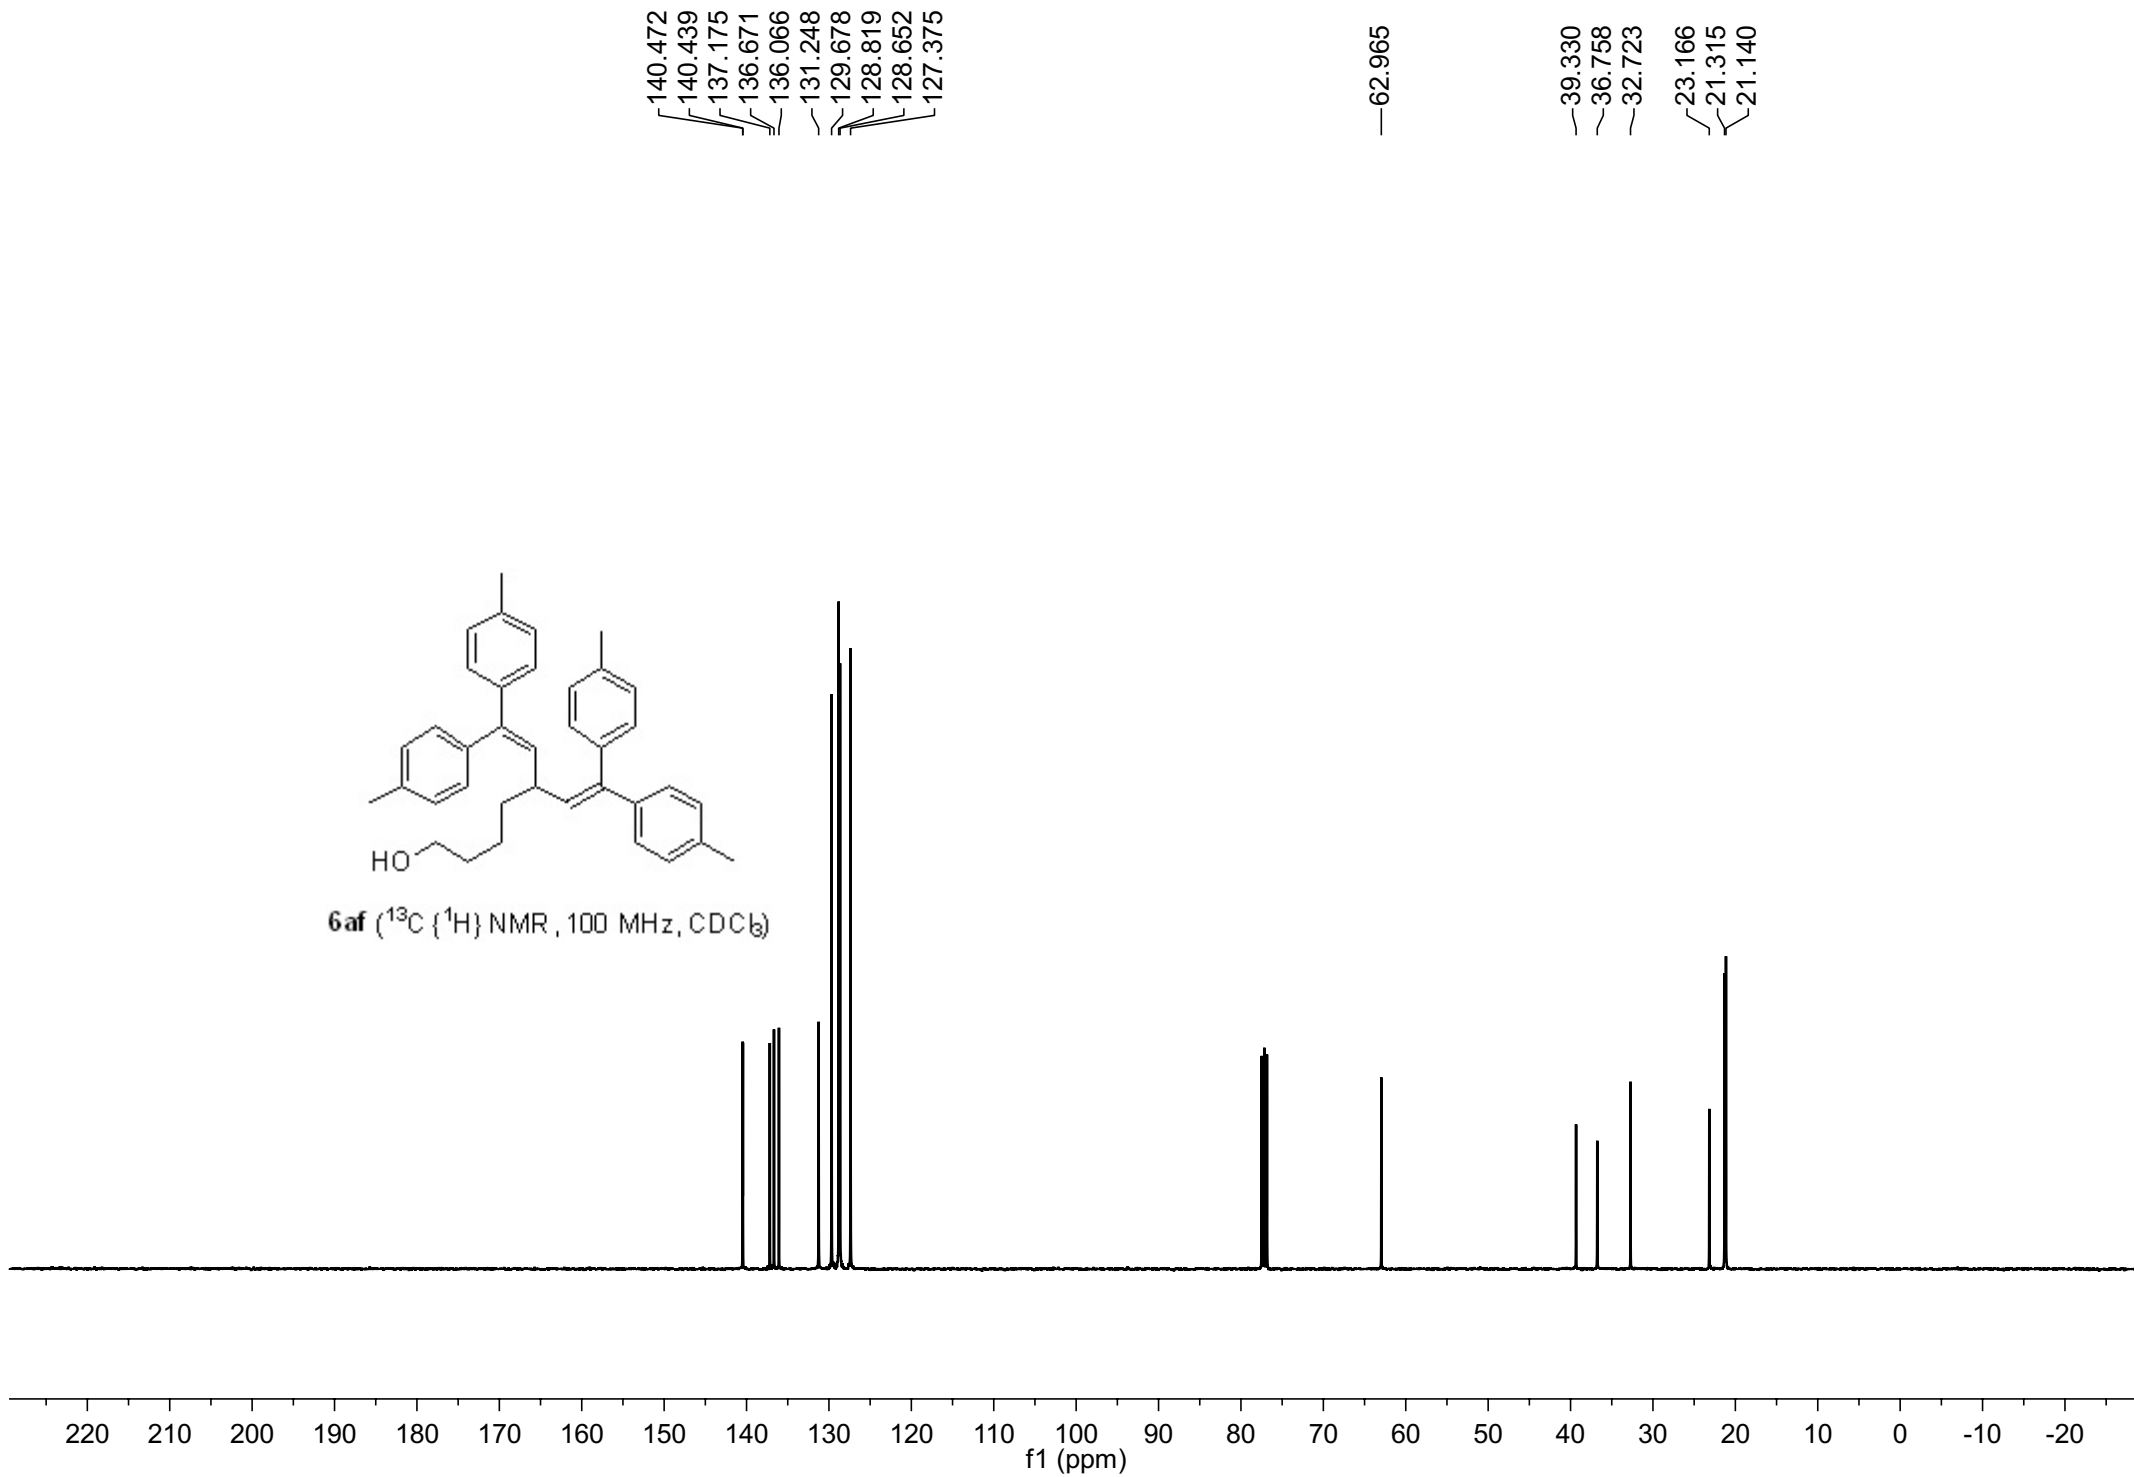

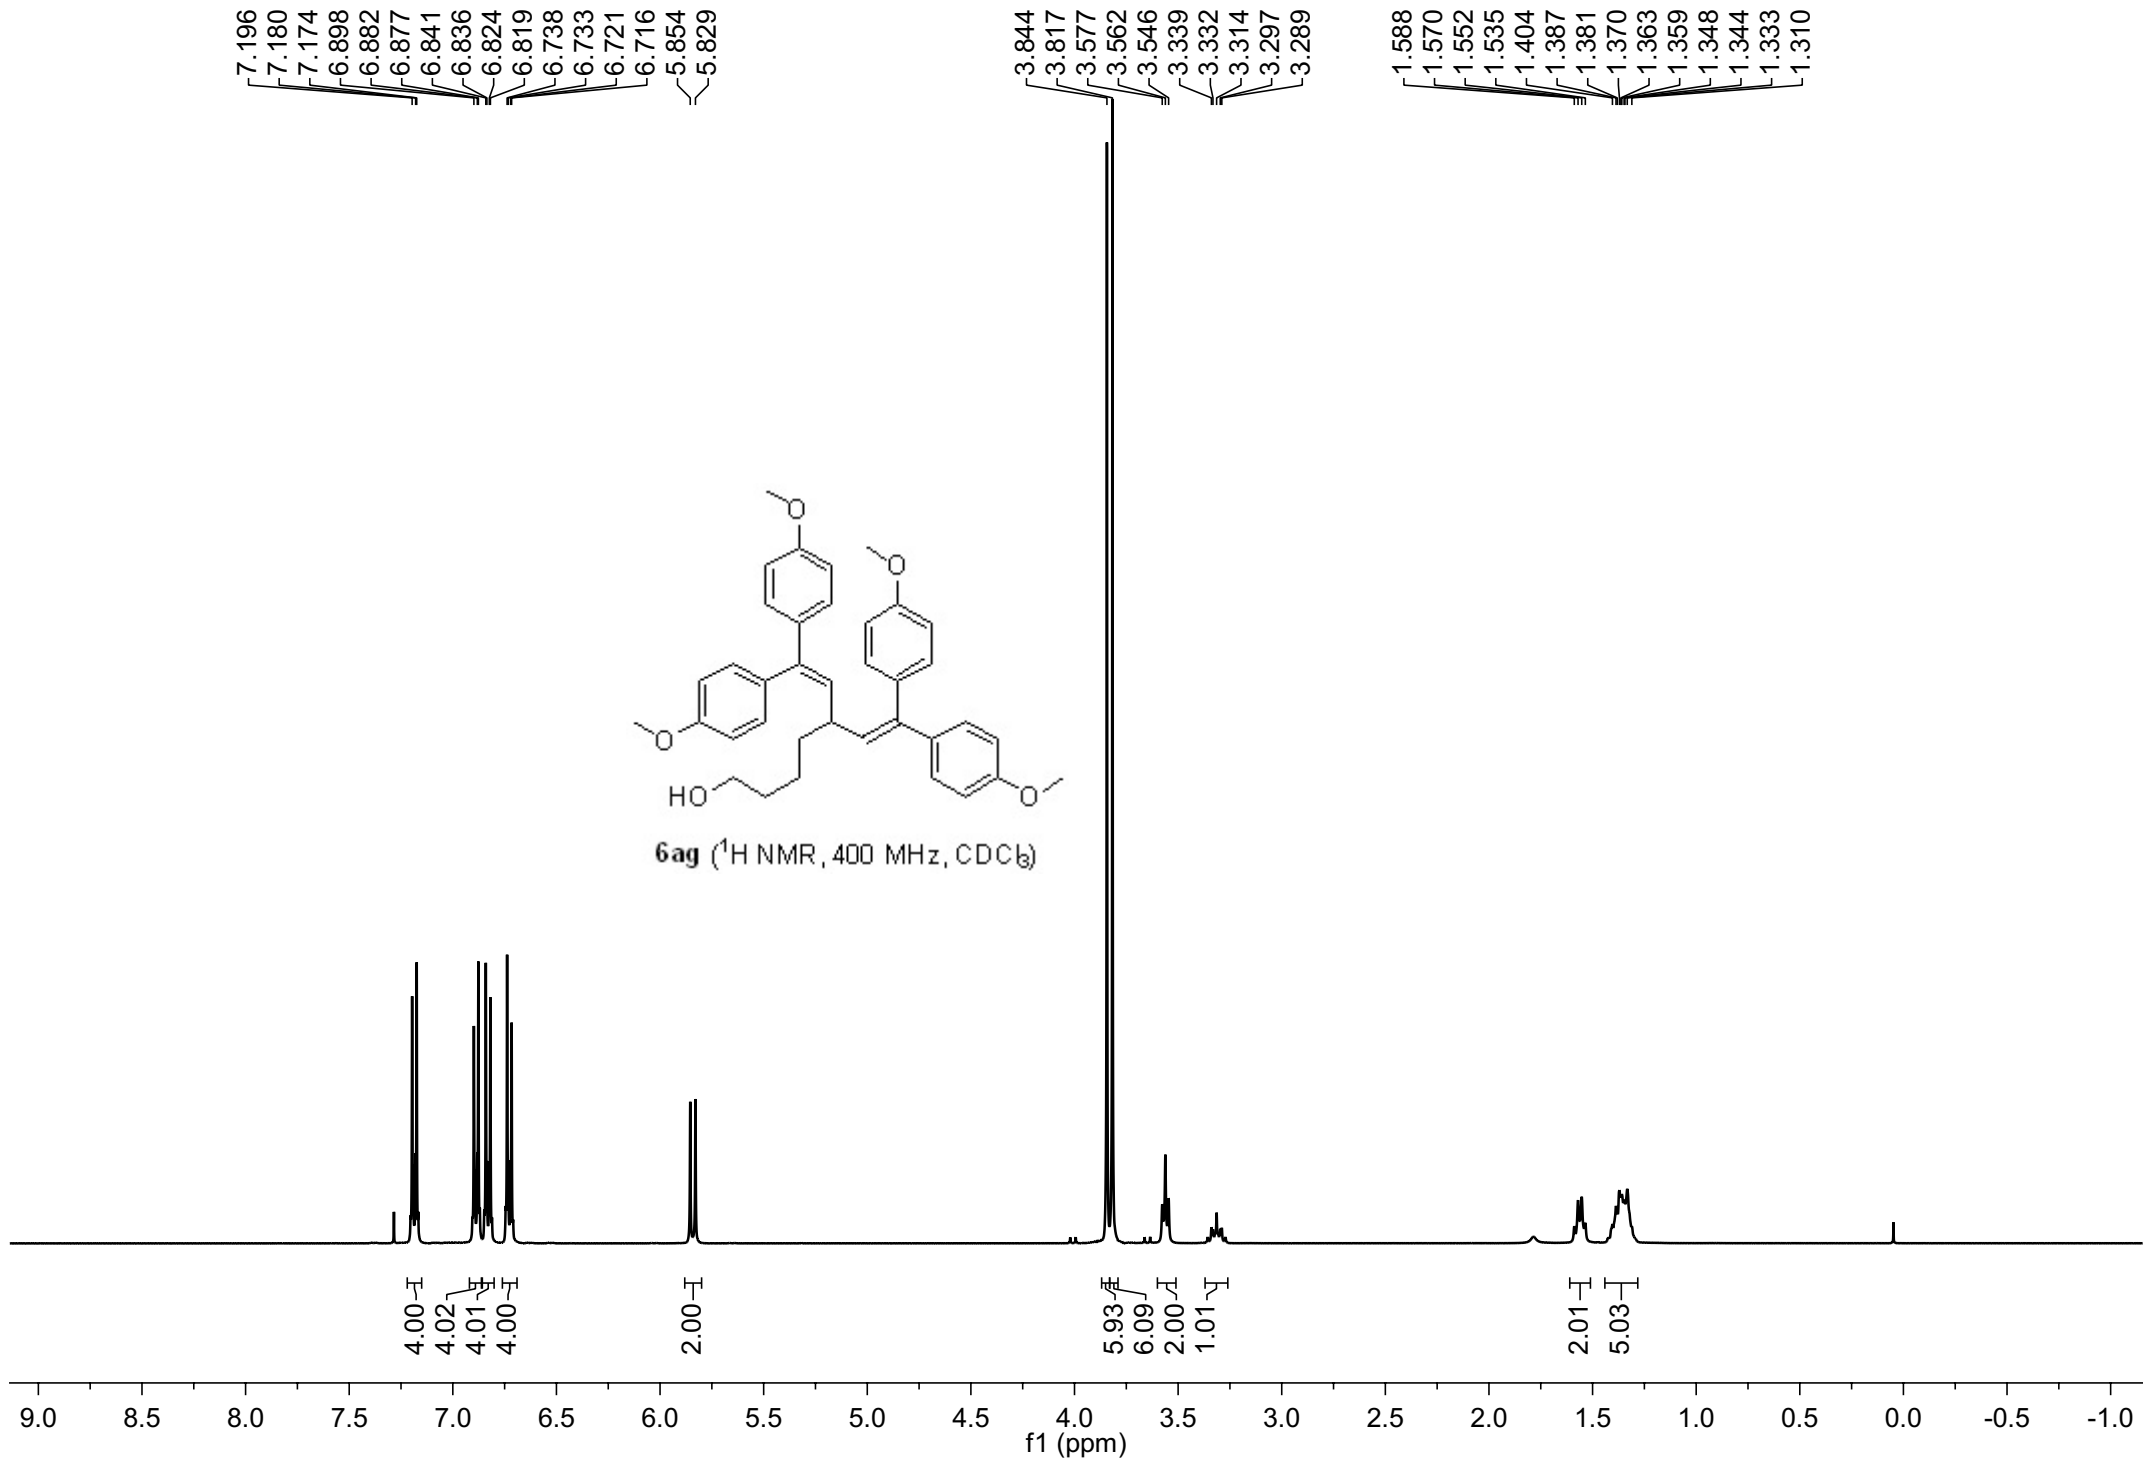

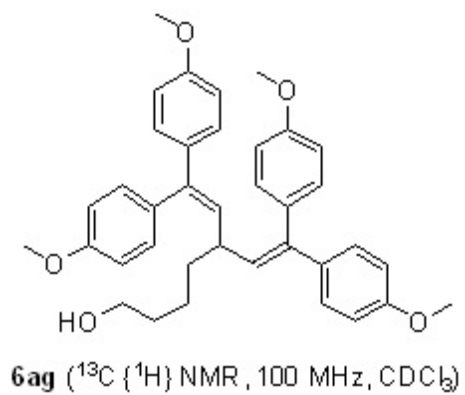

158.832  
158.391

139.606  
136.077  
132.594  
130.897  
130.484  
128.618

113.494  
113.363

62.999

55.376  
55.157

39.377  
36.895  
32.765

23.236

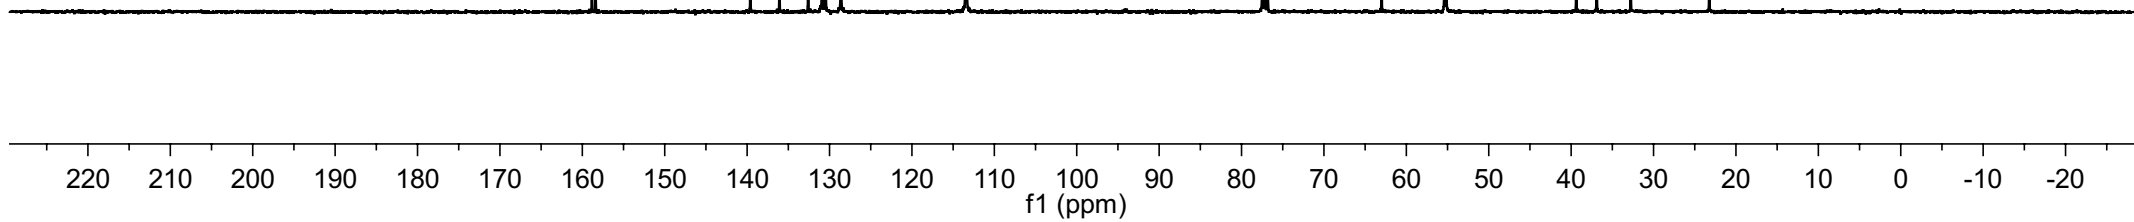

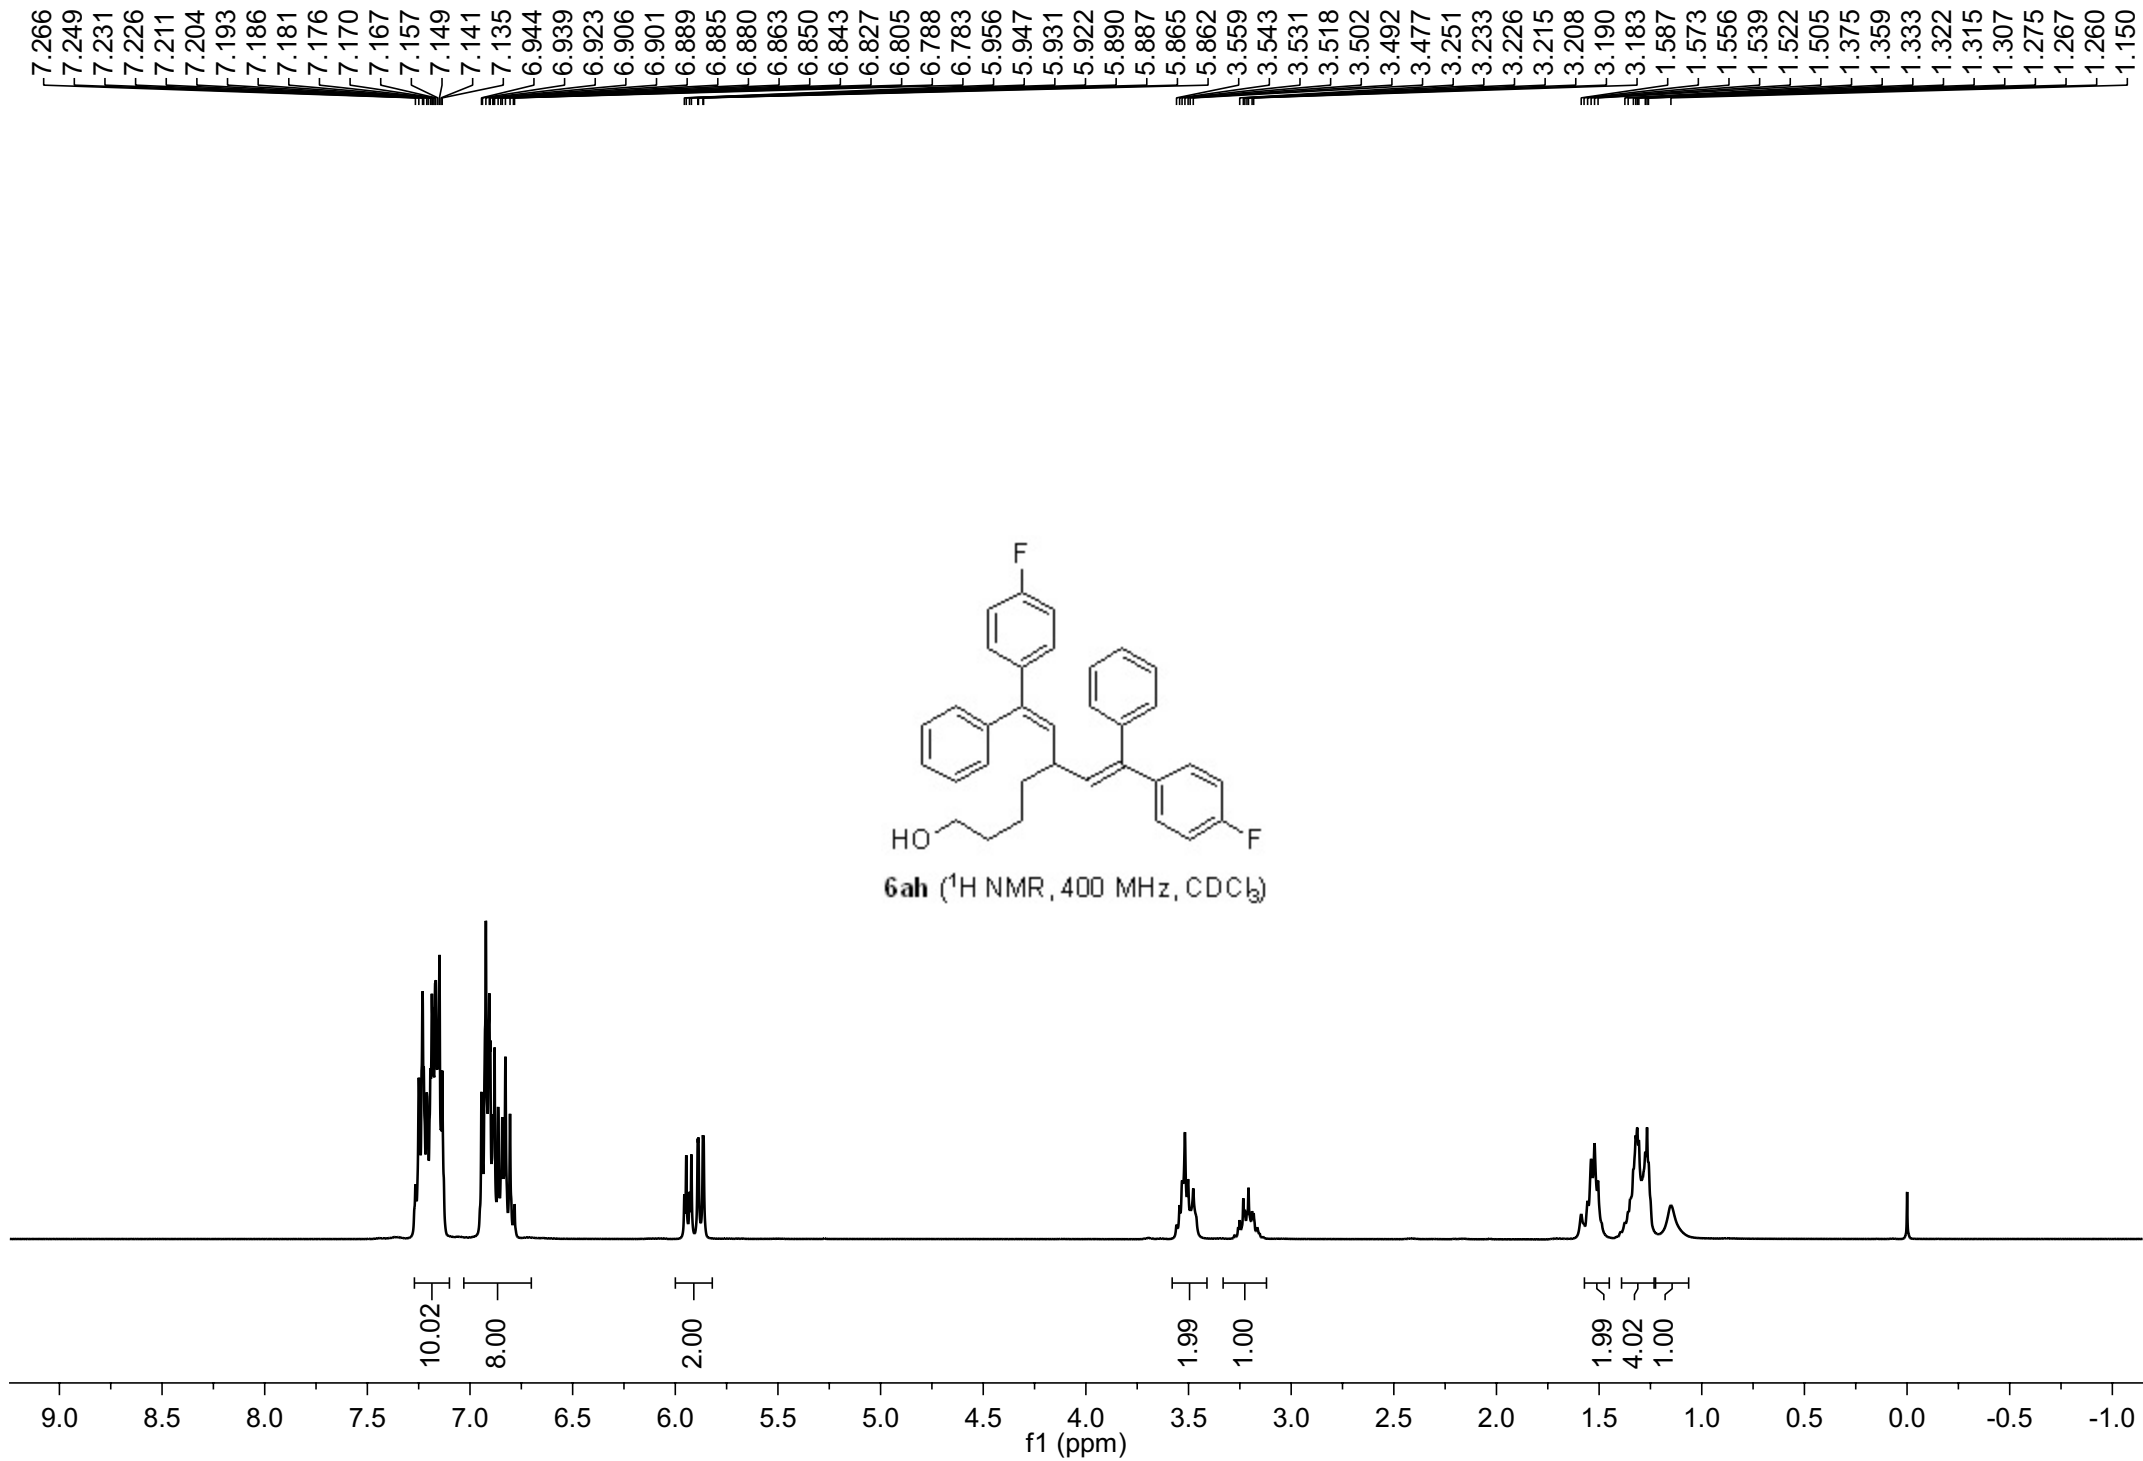

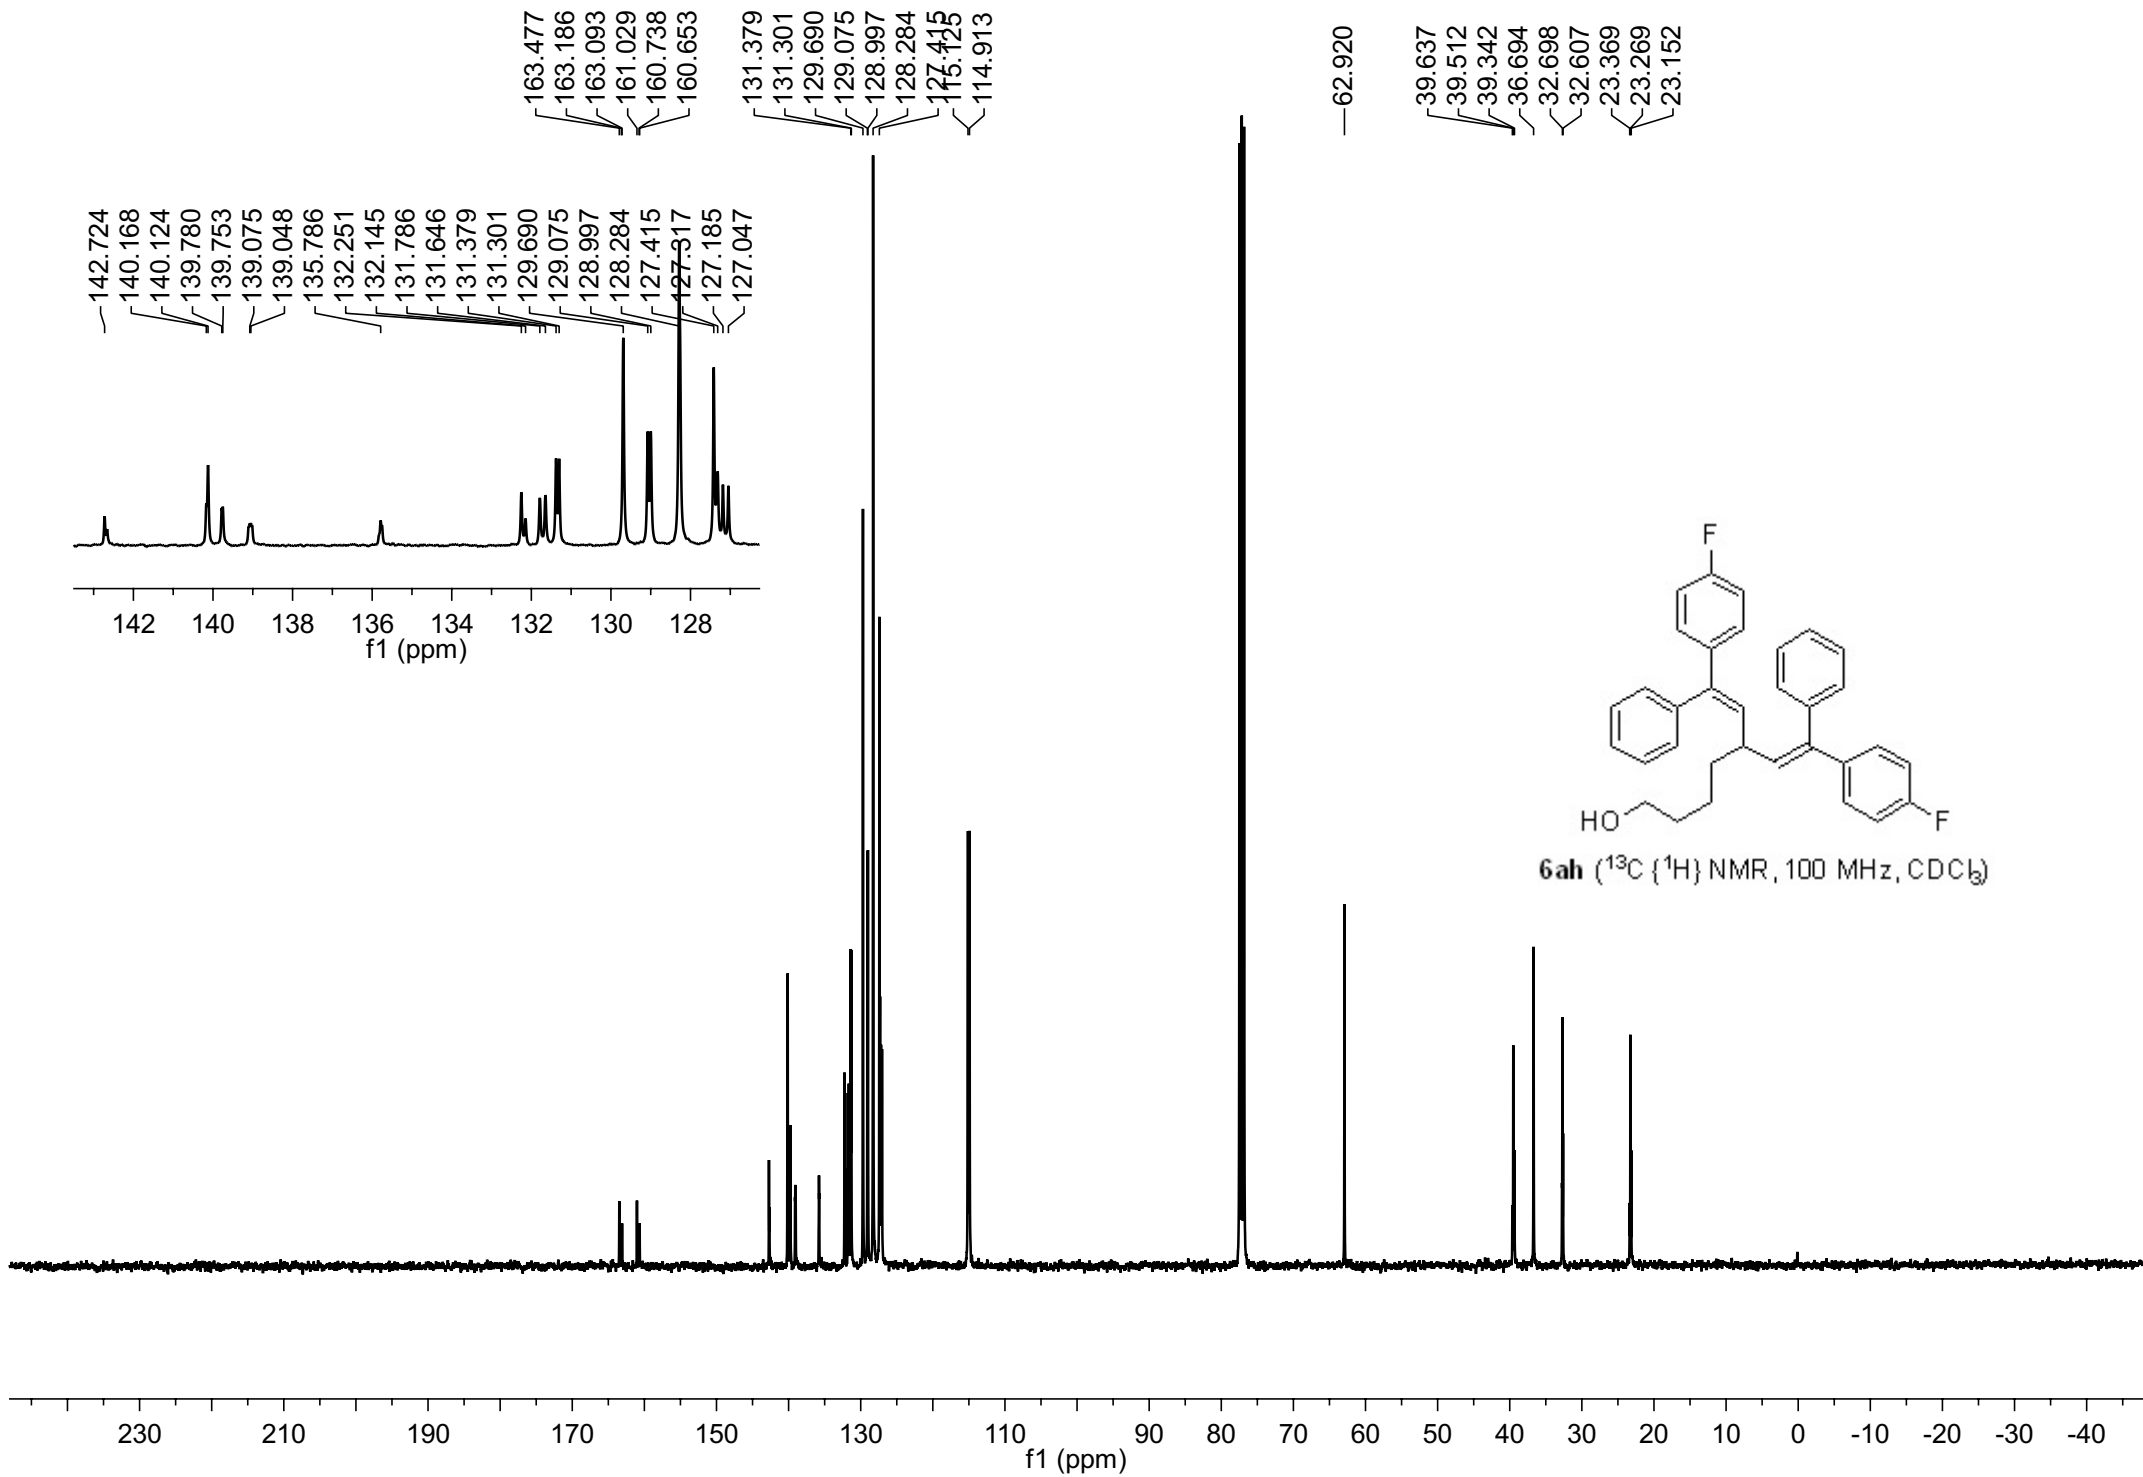

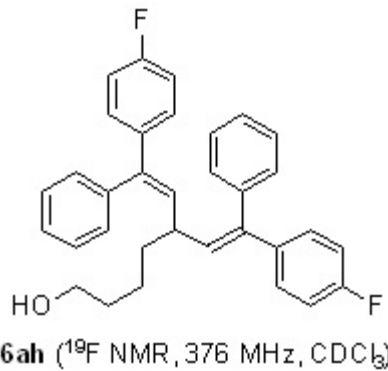

115.30  
115.65  
115.69  
115.74

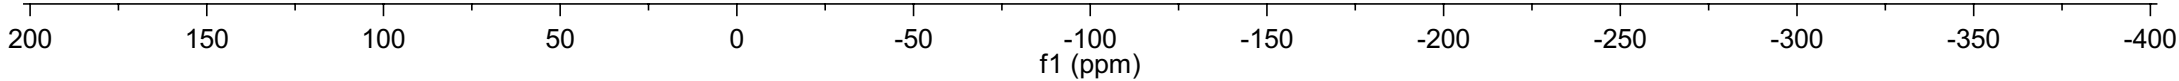



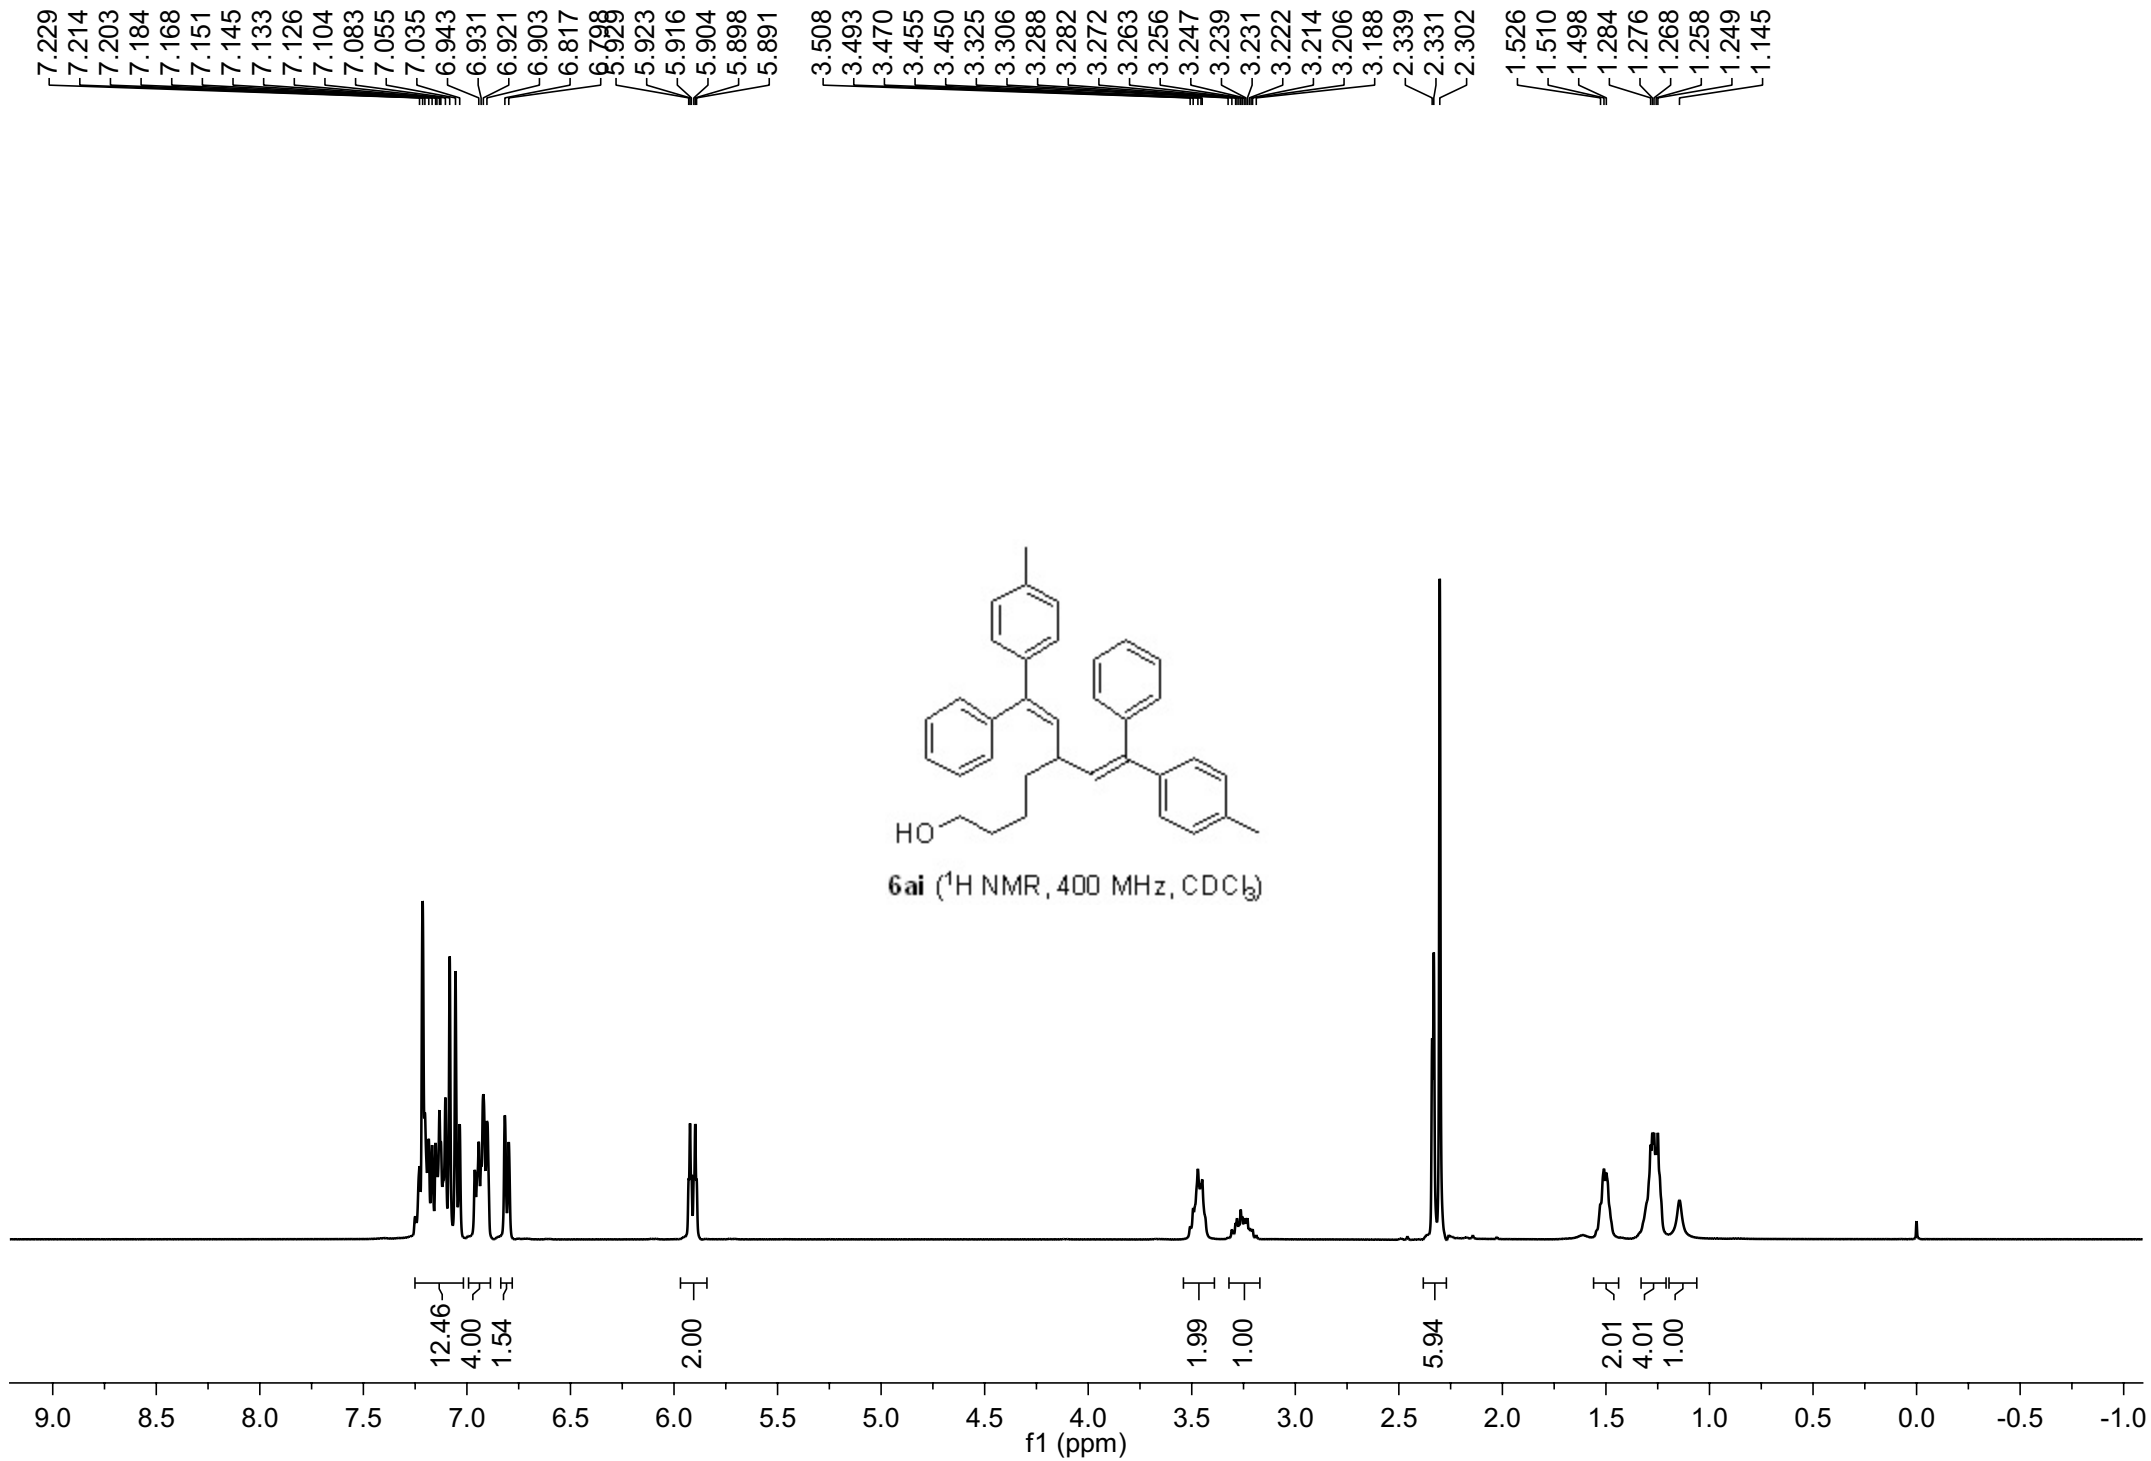

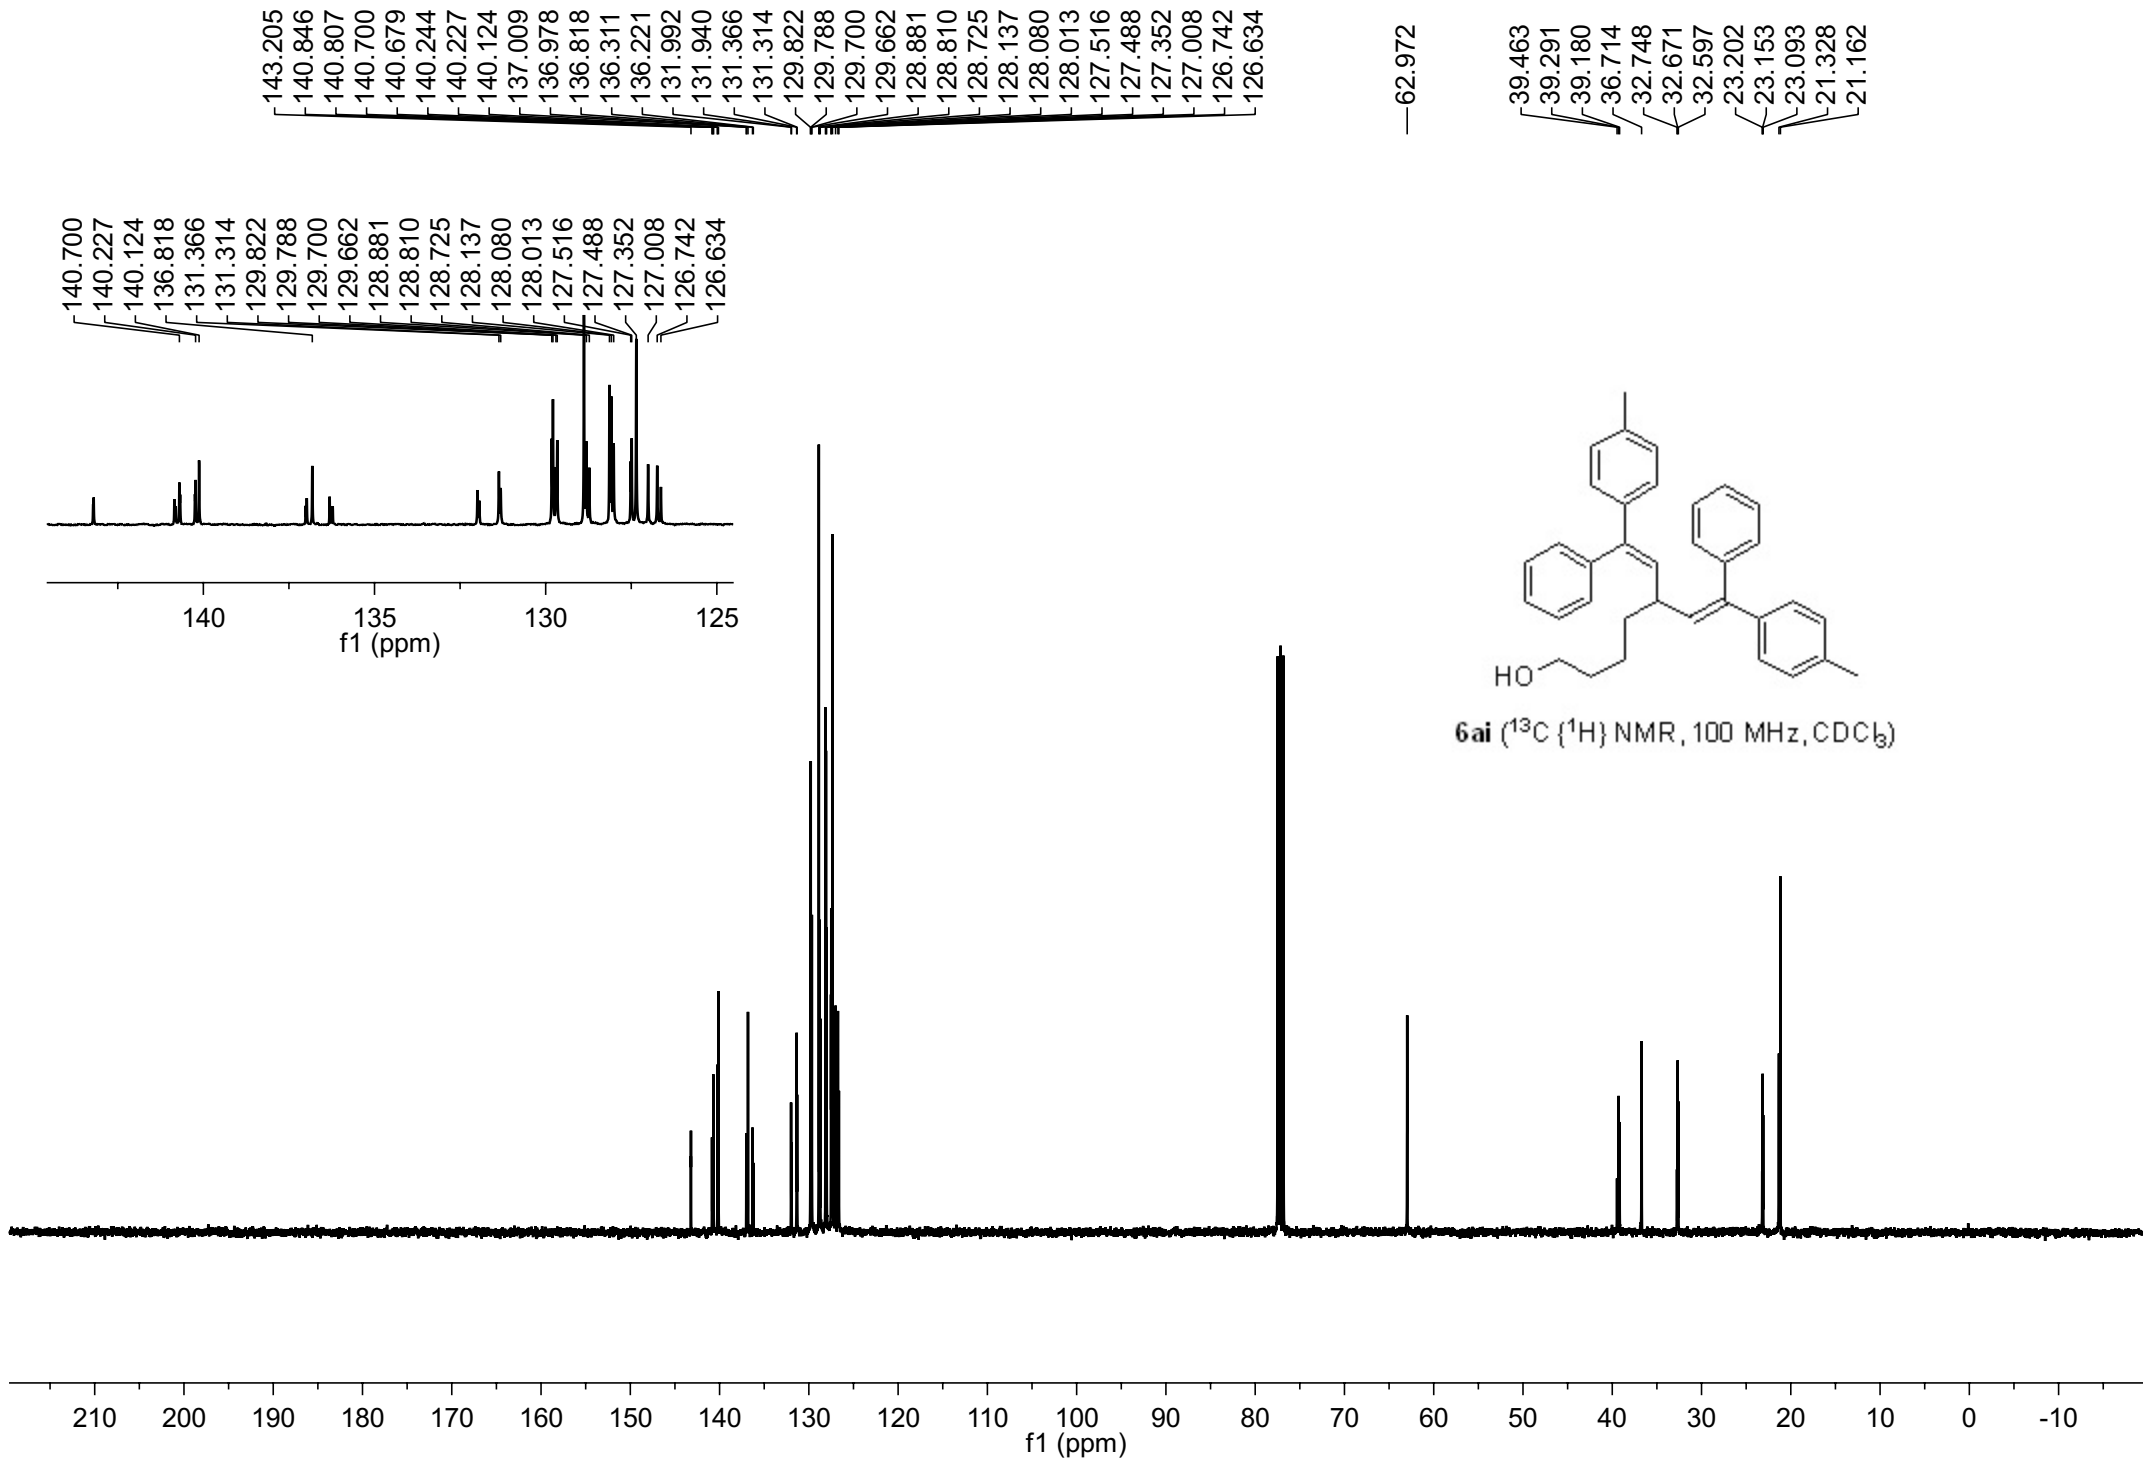

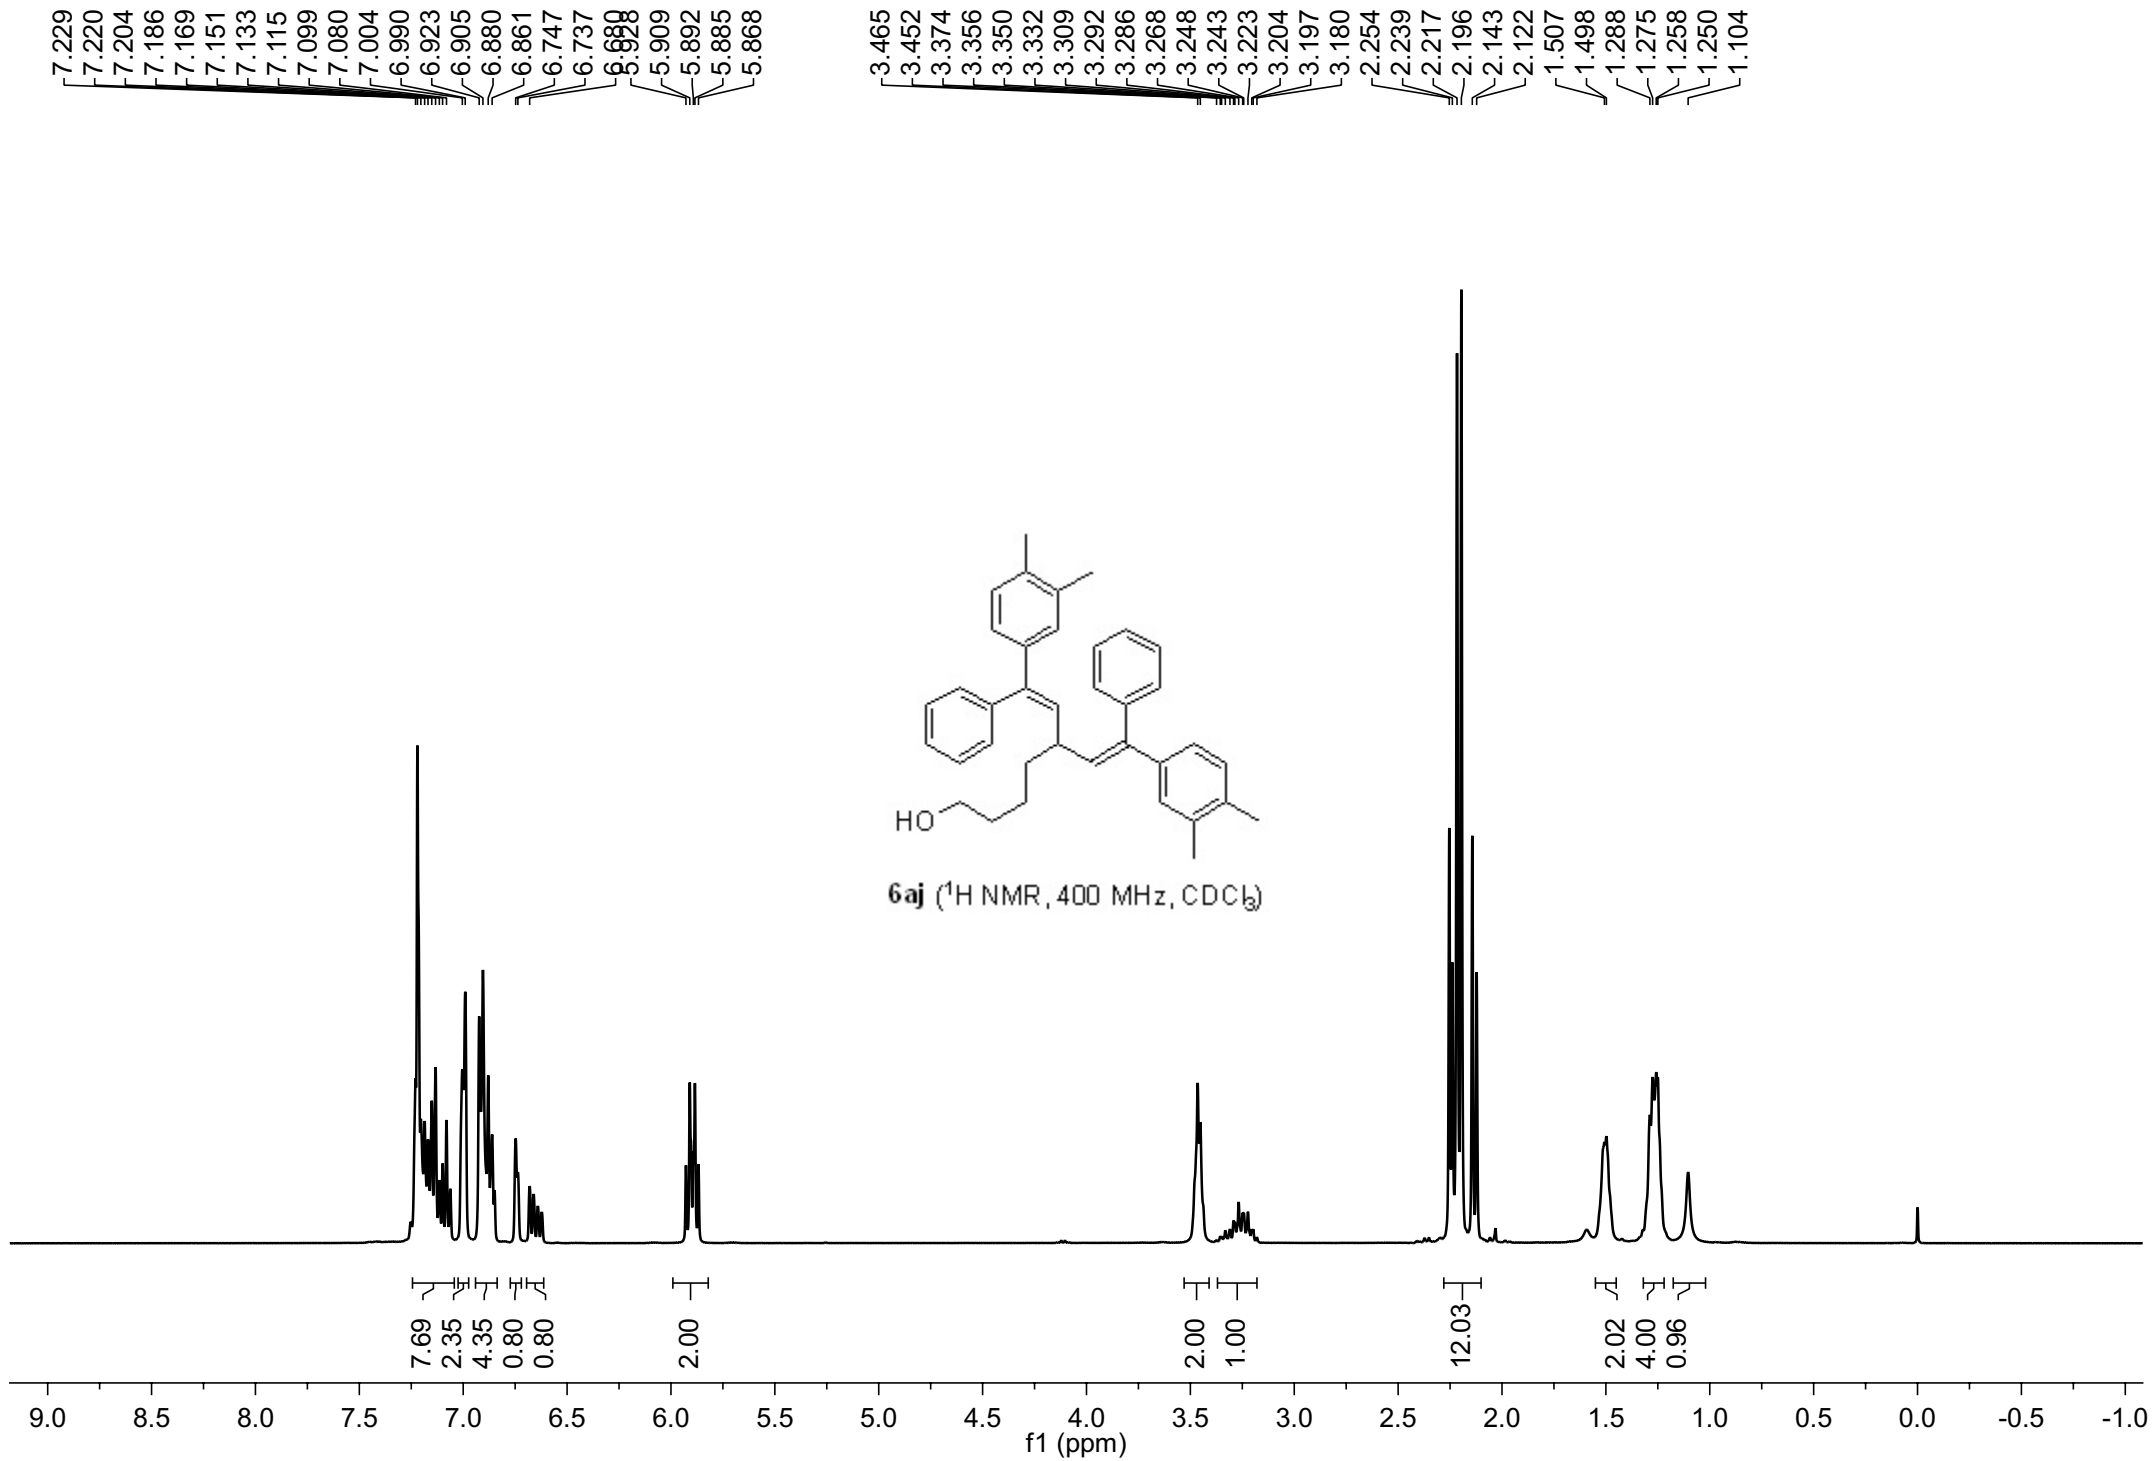

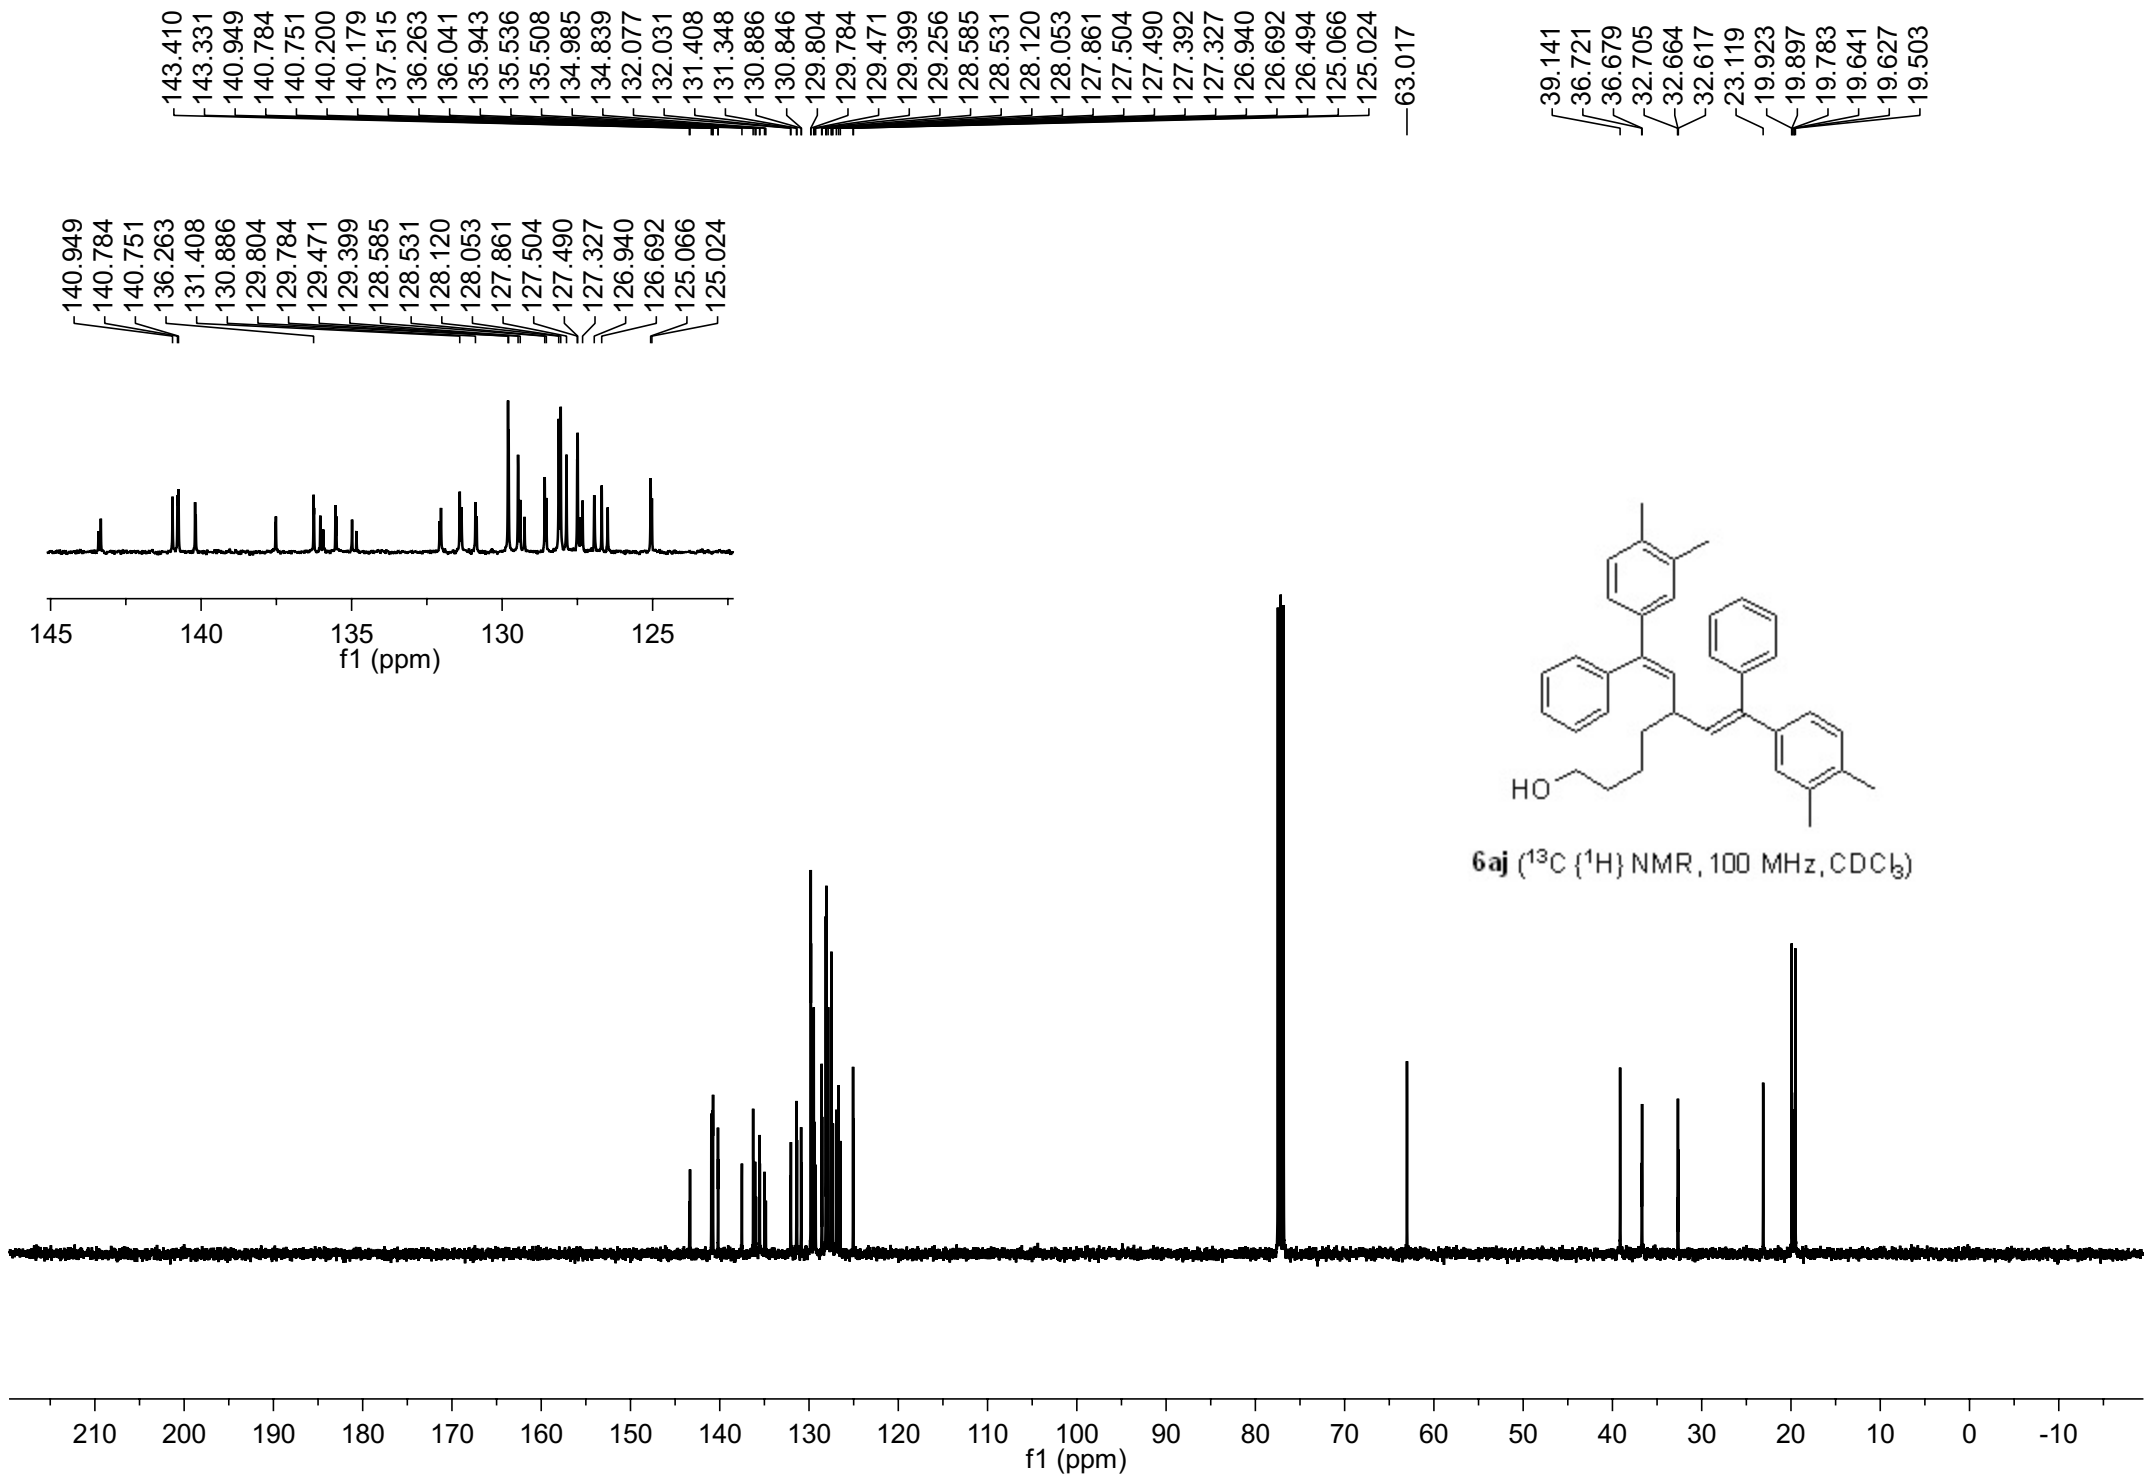

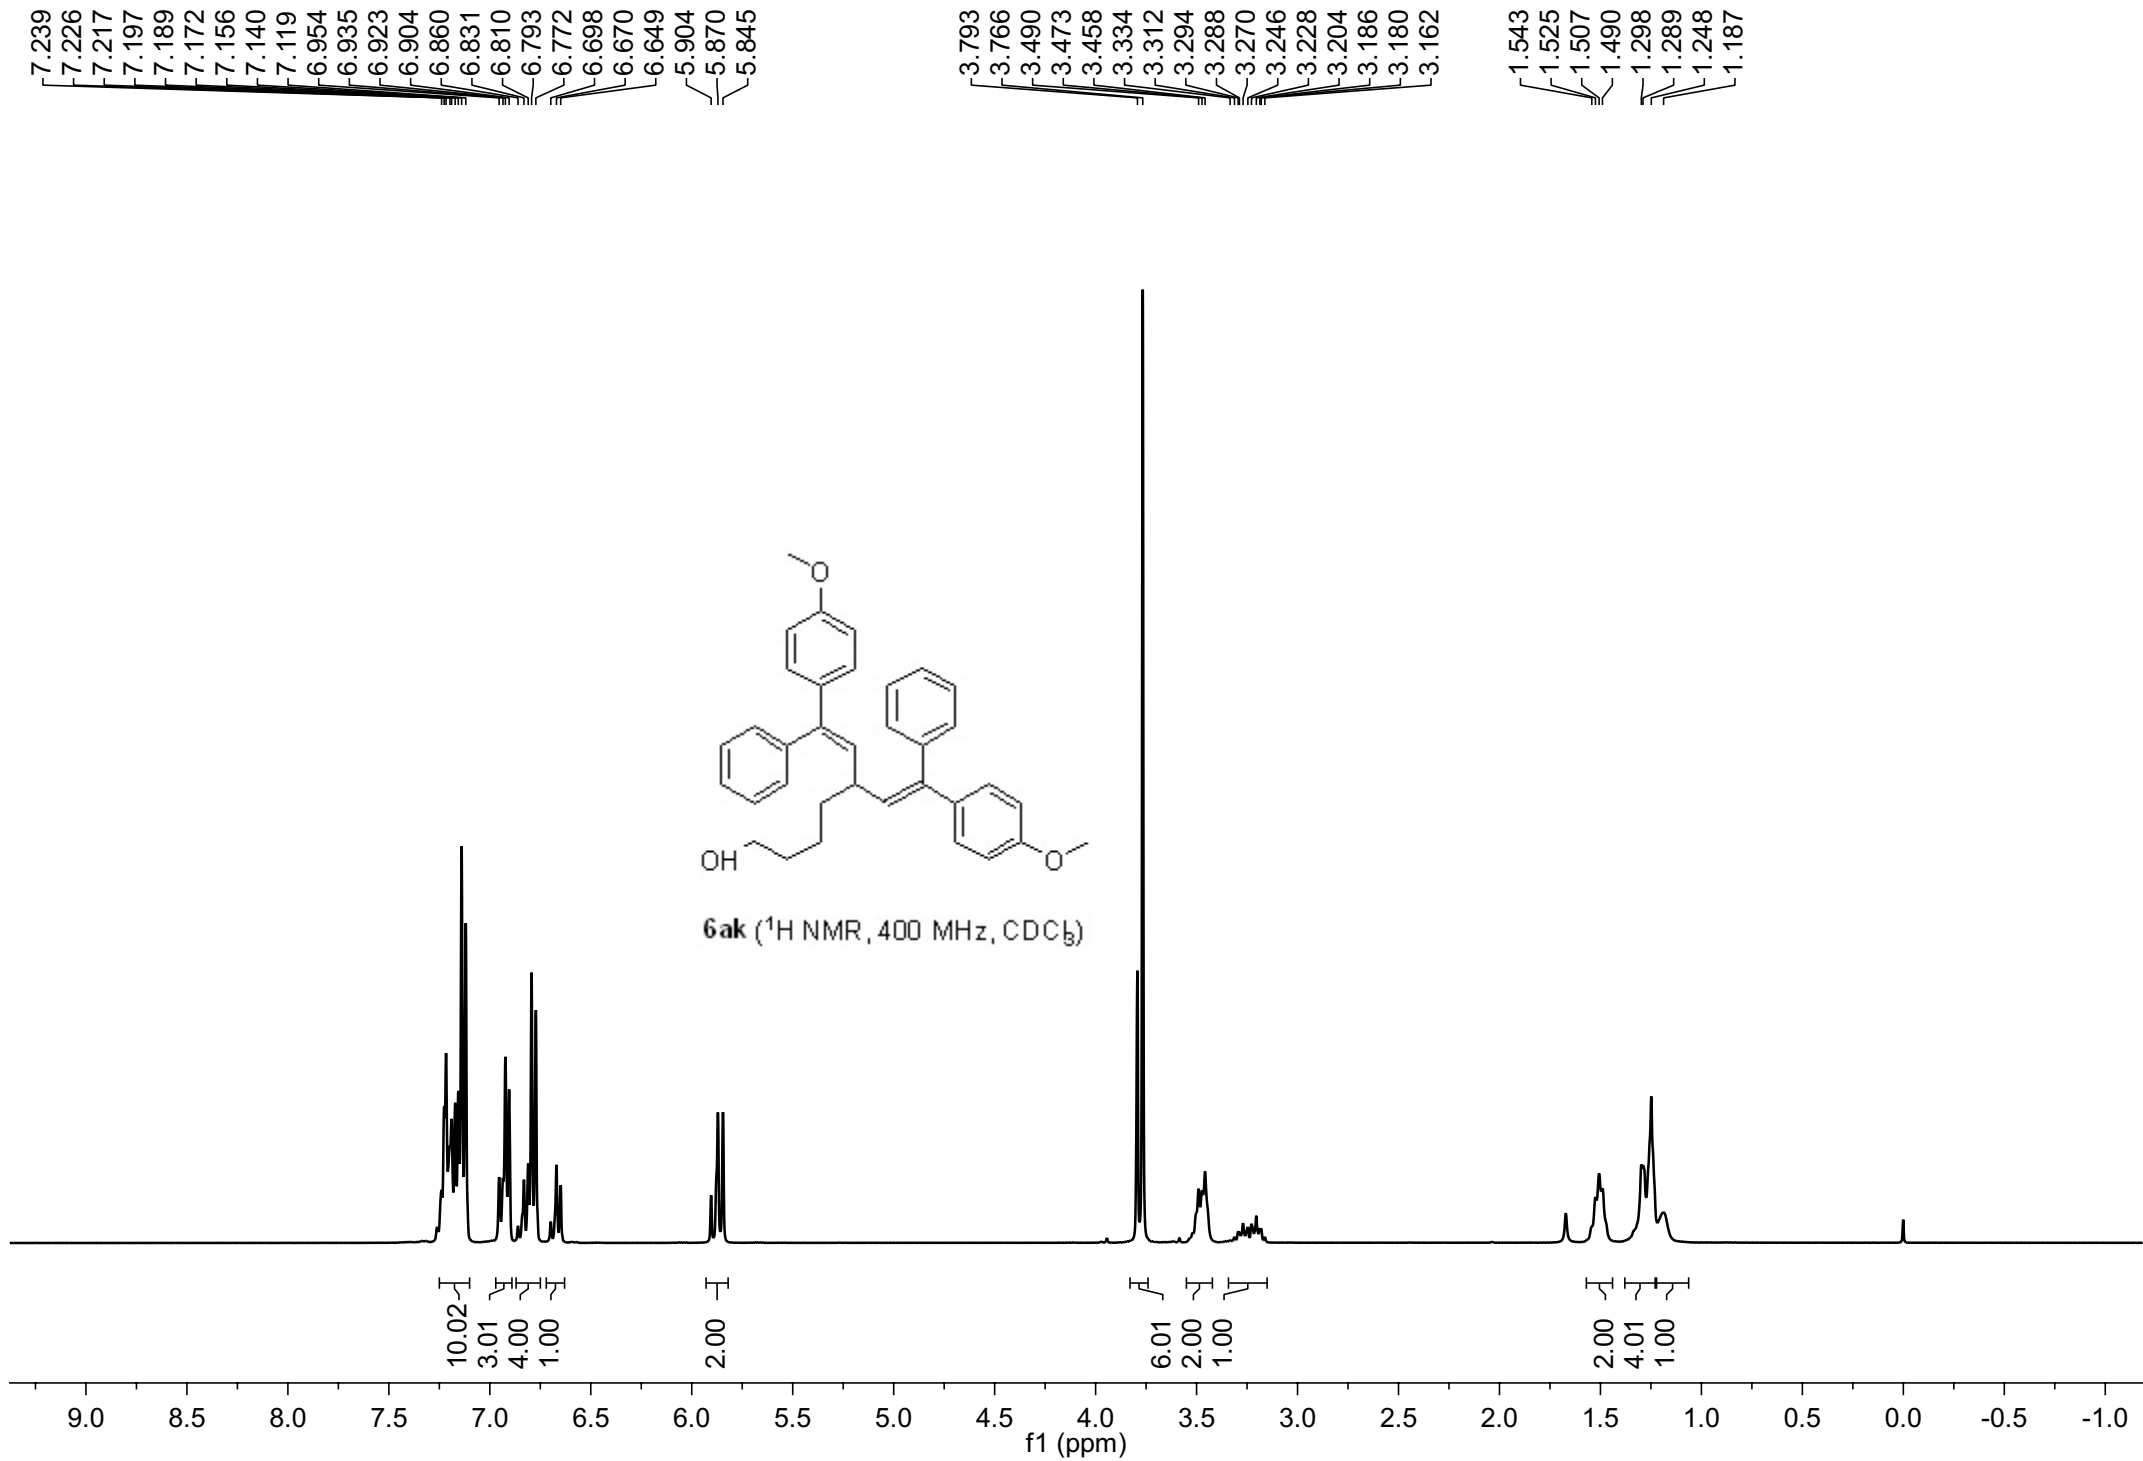

168.894  
167.327  
159.285  
158.894  
158.489  
158.459  
140.229  
140.204  
130.642  
129.769  
128.573  
128.539  
128.137  
128.082  
126.741  
113.562  
113.485

62.965  
55.389  
55.301  
55.178  
39.330  
39.161  
36.823  
36.798  
32.688  
23.695  
23.182  
23.090

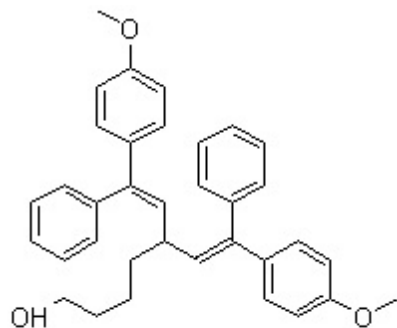

6ak ( $^{13}\text{C}$  { $^1\text{H}$ } NMR, 100 MHz,  $\text{CDCl}_3$ )

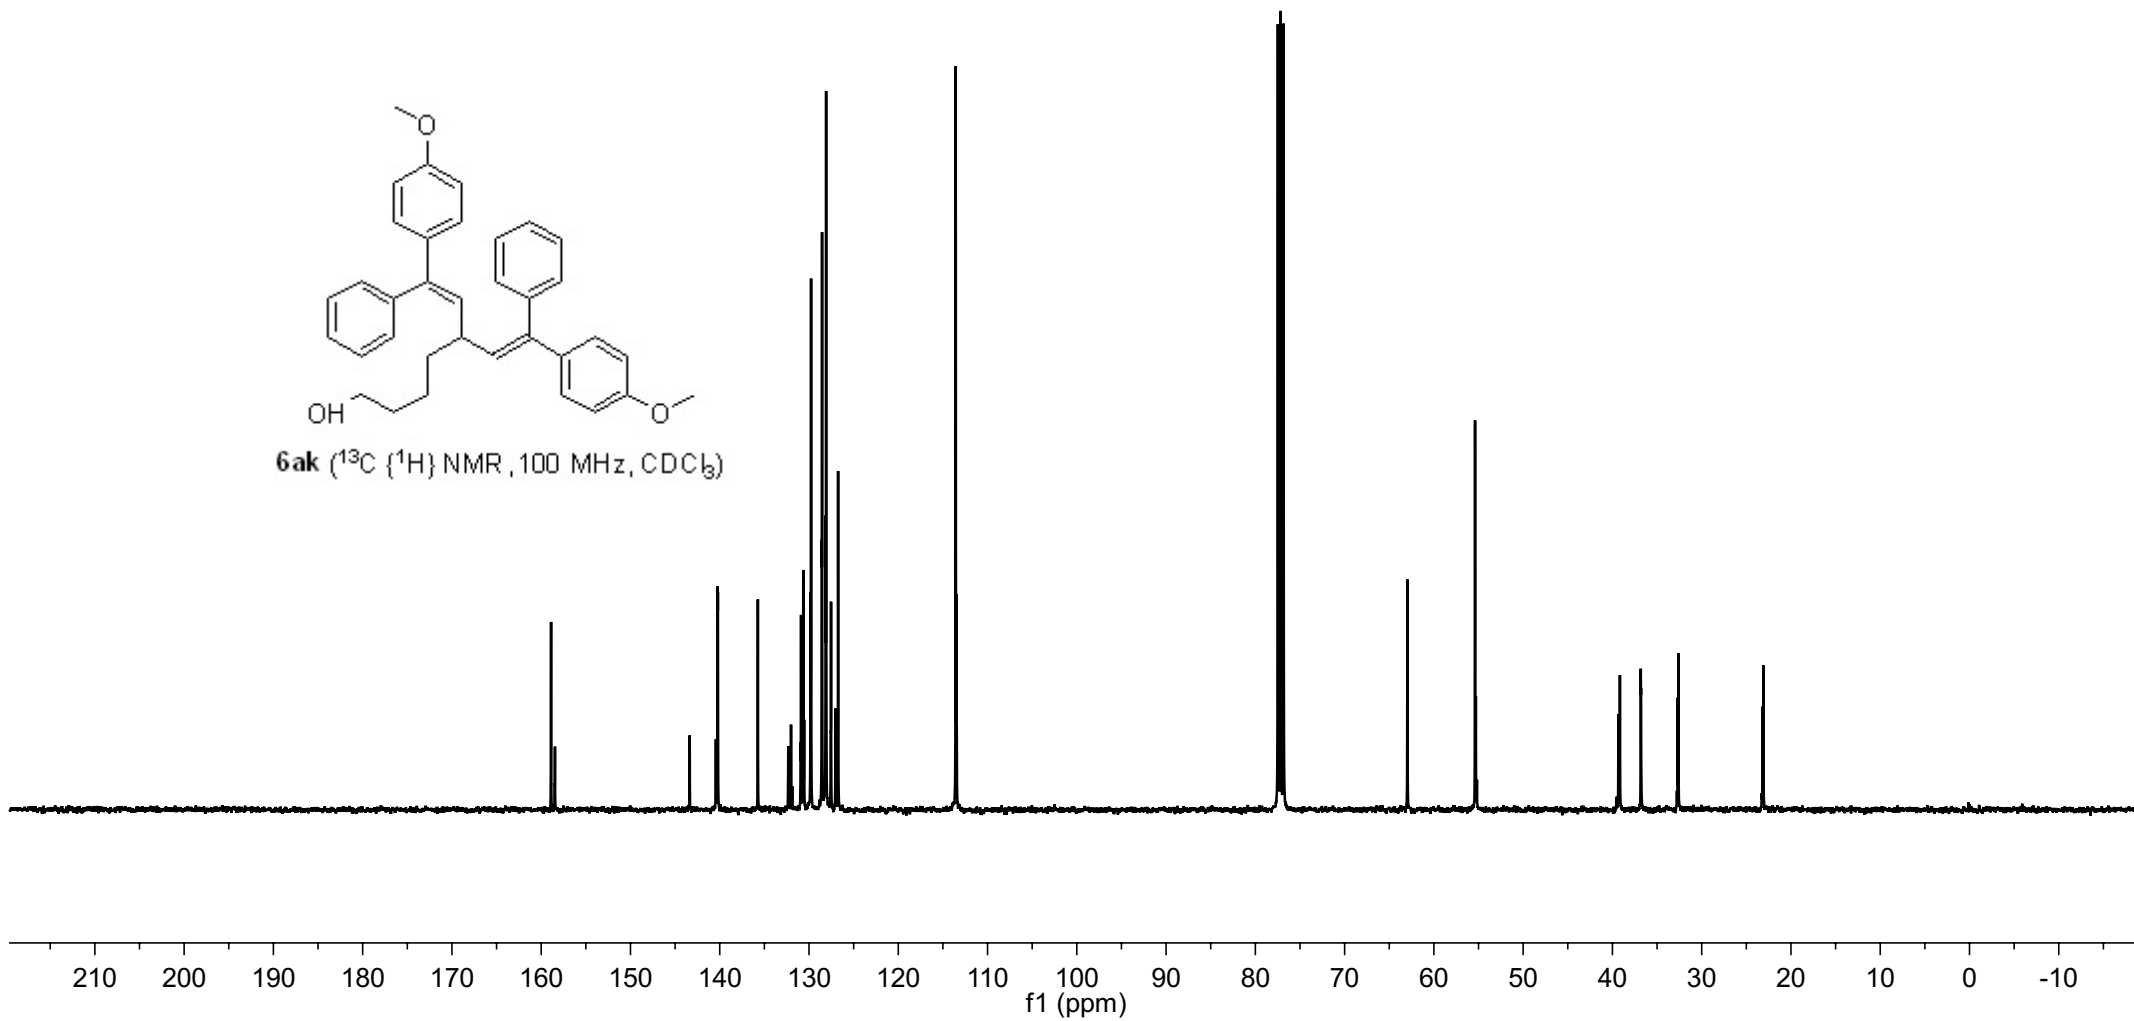

7.274  
7.256  
7.238  
7.217  
7.197  
7.181  
7.164  
7.151  
7.128  
7.106  
7.078  
6.894  
6.875  
6.829  
6.816  
6.797  
5.955  
5.929  
5.903  
3.661  
3.648  
3.633  
3.615  
3.577  
3.561  
3.544  
3.528  
3.512  
3.477  
3.383  
3.351  
3.295  
3.277  
3.270  
3.253  
3.232  
3.213  
3.189  
3.170  
3.163  
3.145  
3.120  
1.574  
1.558  
1.541  
1.524  
1.507  
1.423  
1.404  
1.387  
1.365  
1.348  
1.332  
1.291  
1.258

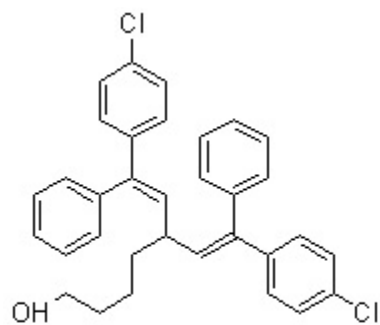

**6al** ( $^1\text{H NMR}$ , 400 MHz,  $\text{CDCl}_3$ )

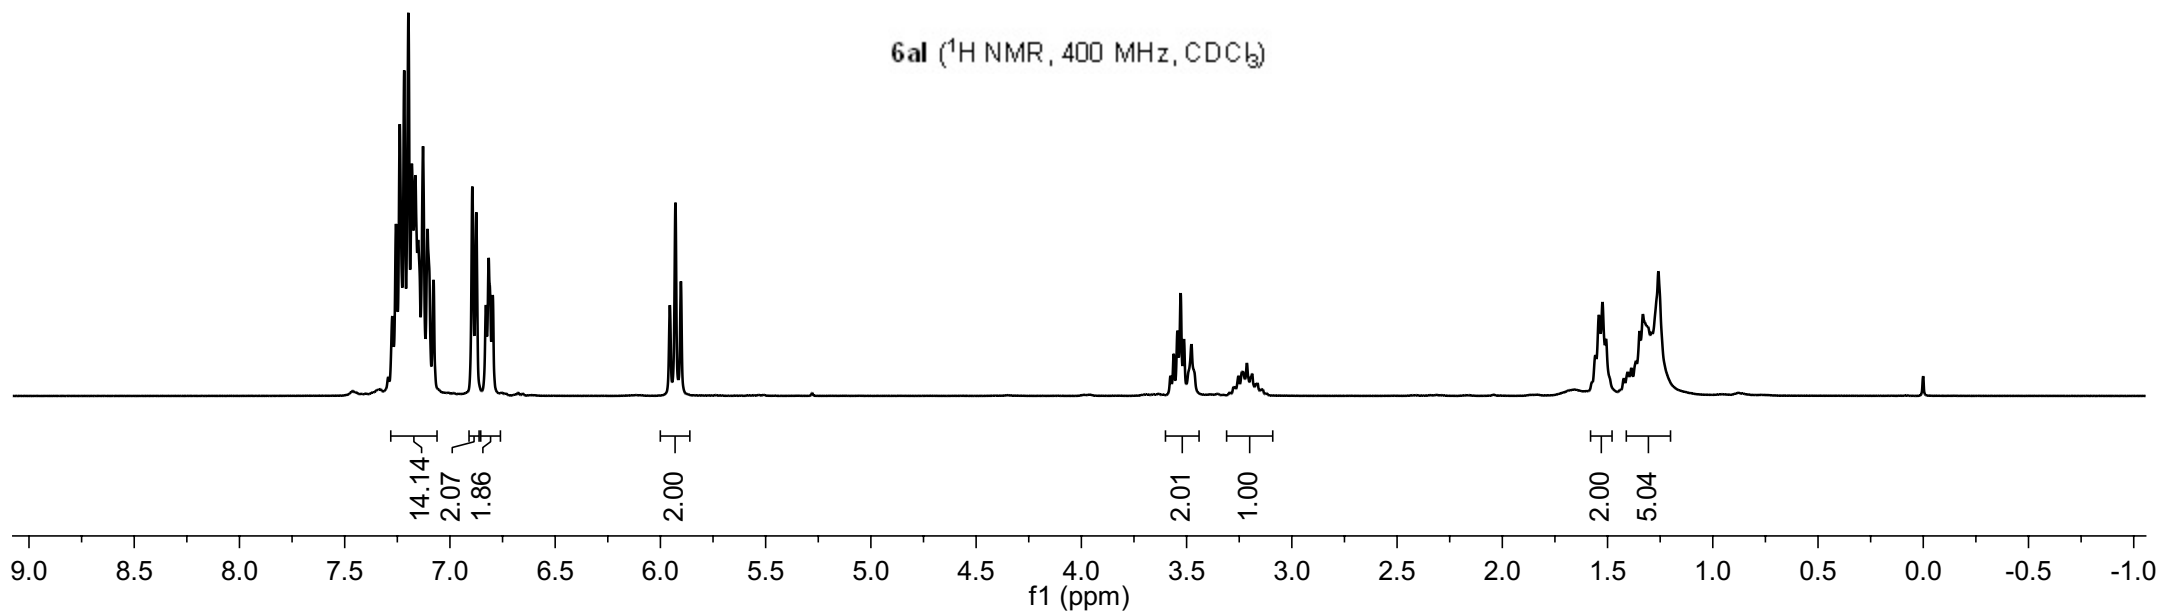

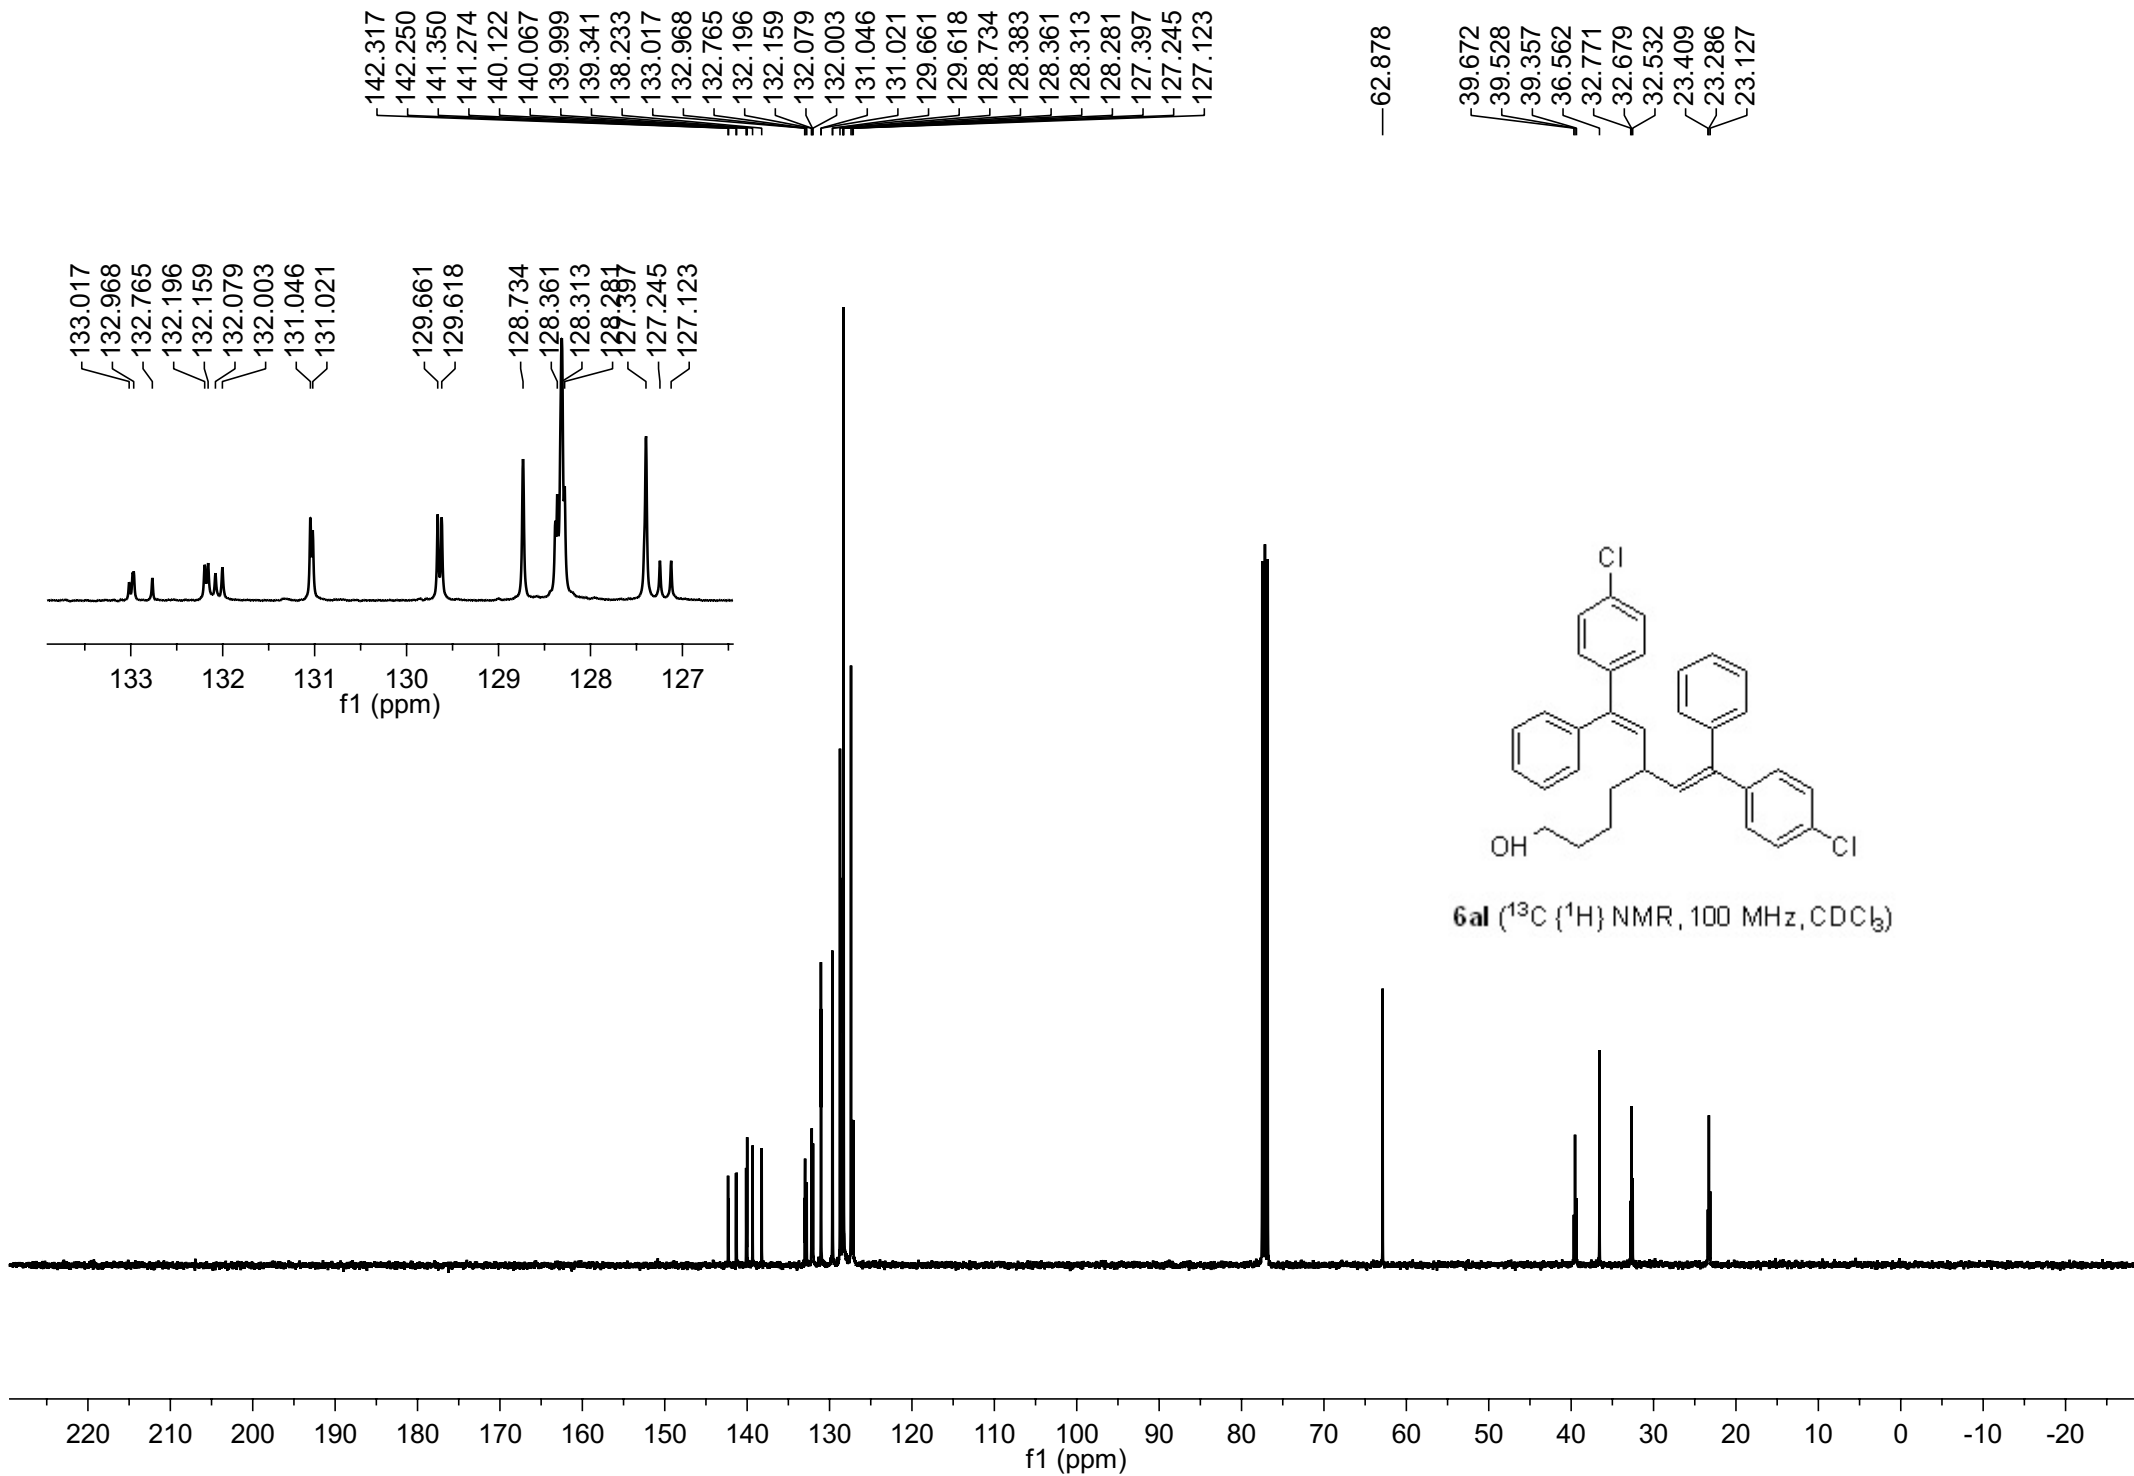



7.262  
7.241  
7.233  
7.227  
7.216  
7.213  
7.204  
7.199  
7.195  
7.190  
7.187  
7.183  
7.169  
7.154  
7.150  
7.133  
7.129  
6.937  
6.920  
6.916  
5.951

3.353  
3.337  
3.321  
3.295  
3.277  
3.270  
3.260  
3.252  
3.245  
3.235  
3.227  
3.210

1.564  
1.556  
1.544  
1.527  
1.486  
1.474  
1.469

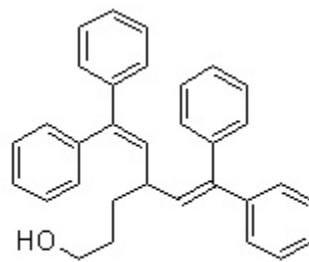

**8ba** ( $^1\text{H NMR}$ , 400 MHz,  $\text{CDCl}_3$ )

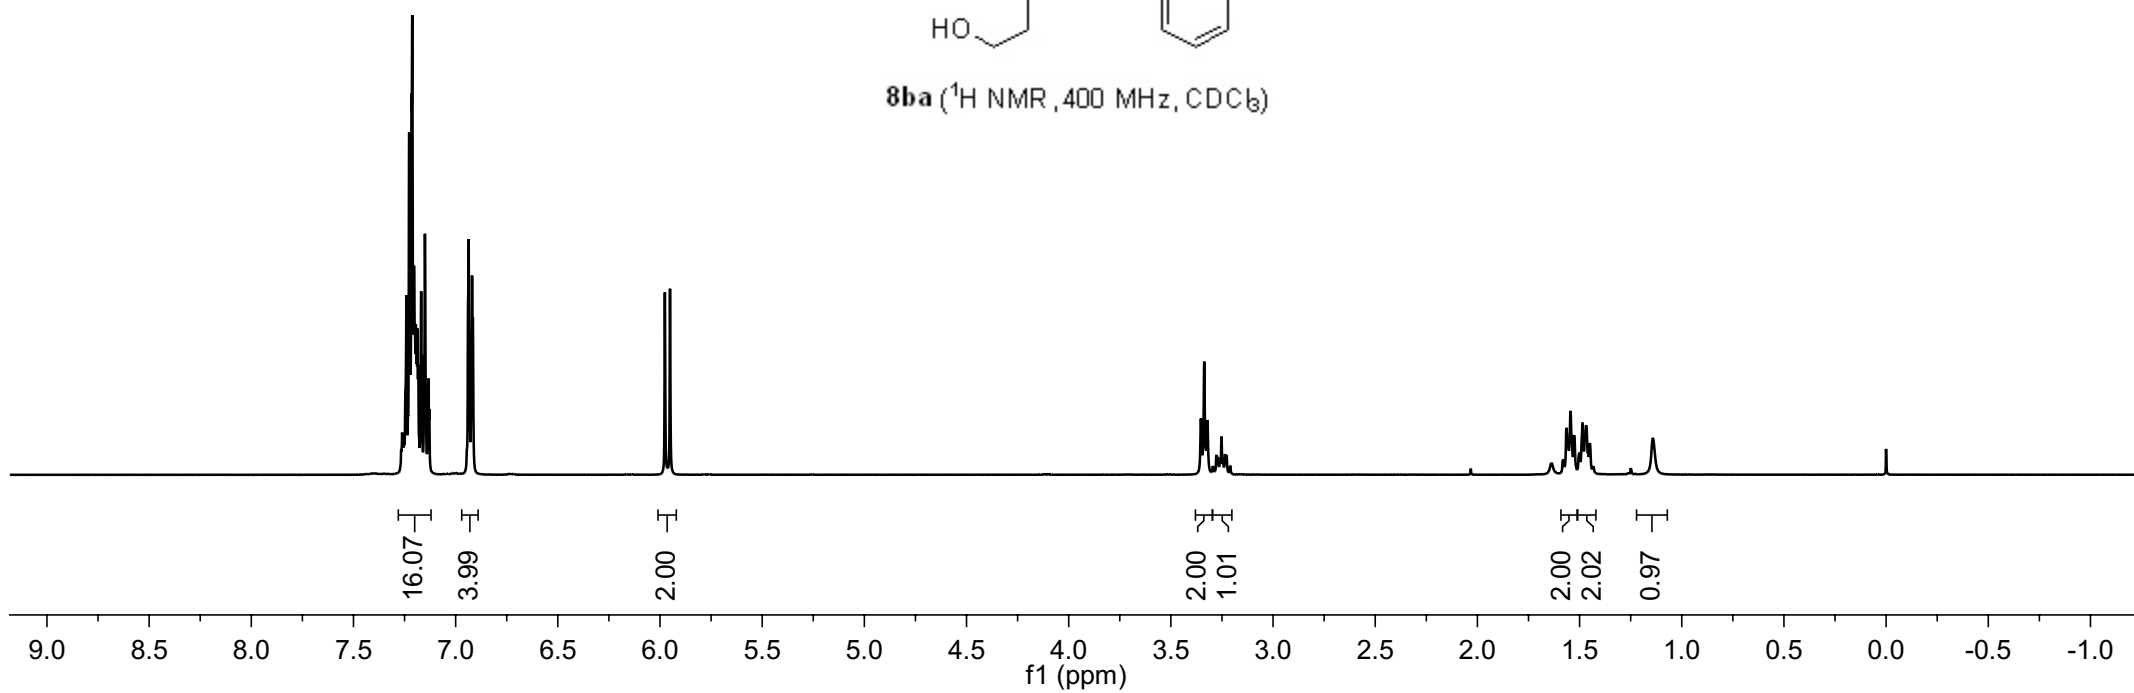

142.864  
141.173  
139.862  
131.821  
129.748  
128.193  
128.163  
127.460  
127.151  
126.902

62.566

39.085  
32.860  
30.065

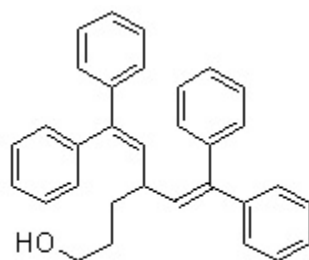

8ba ( $^{13}\text{C}$  { $^1\text{H}$ } NMR, 100 MHz,  $\text{CDCl}_3$ )

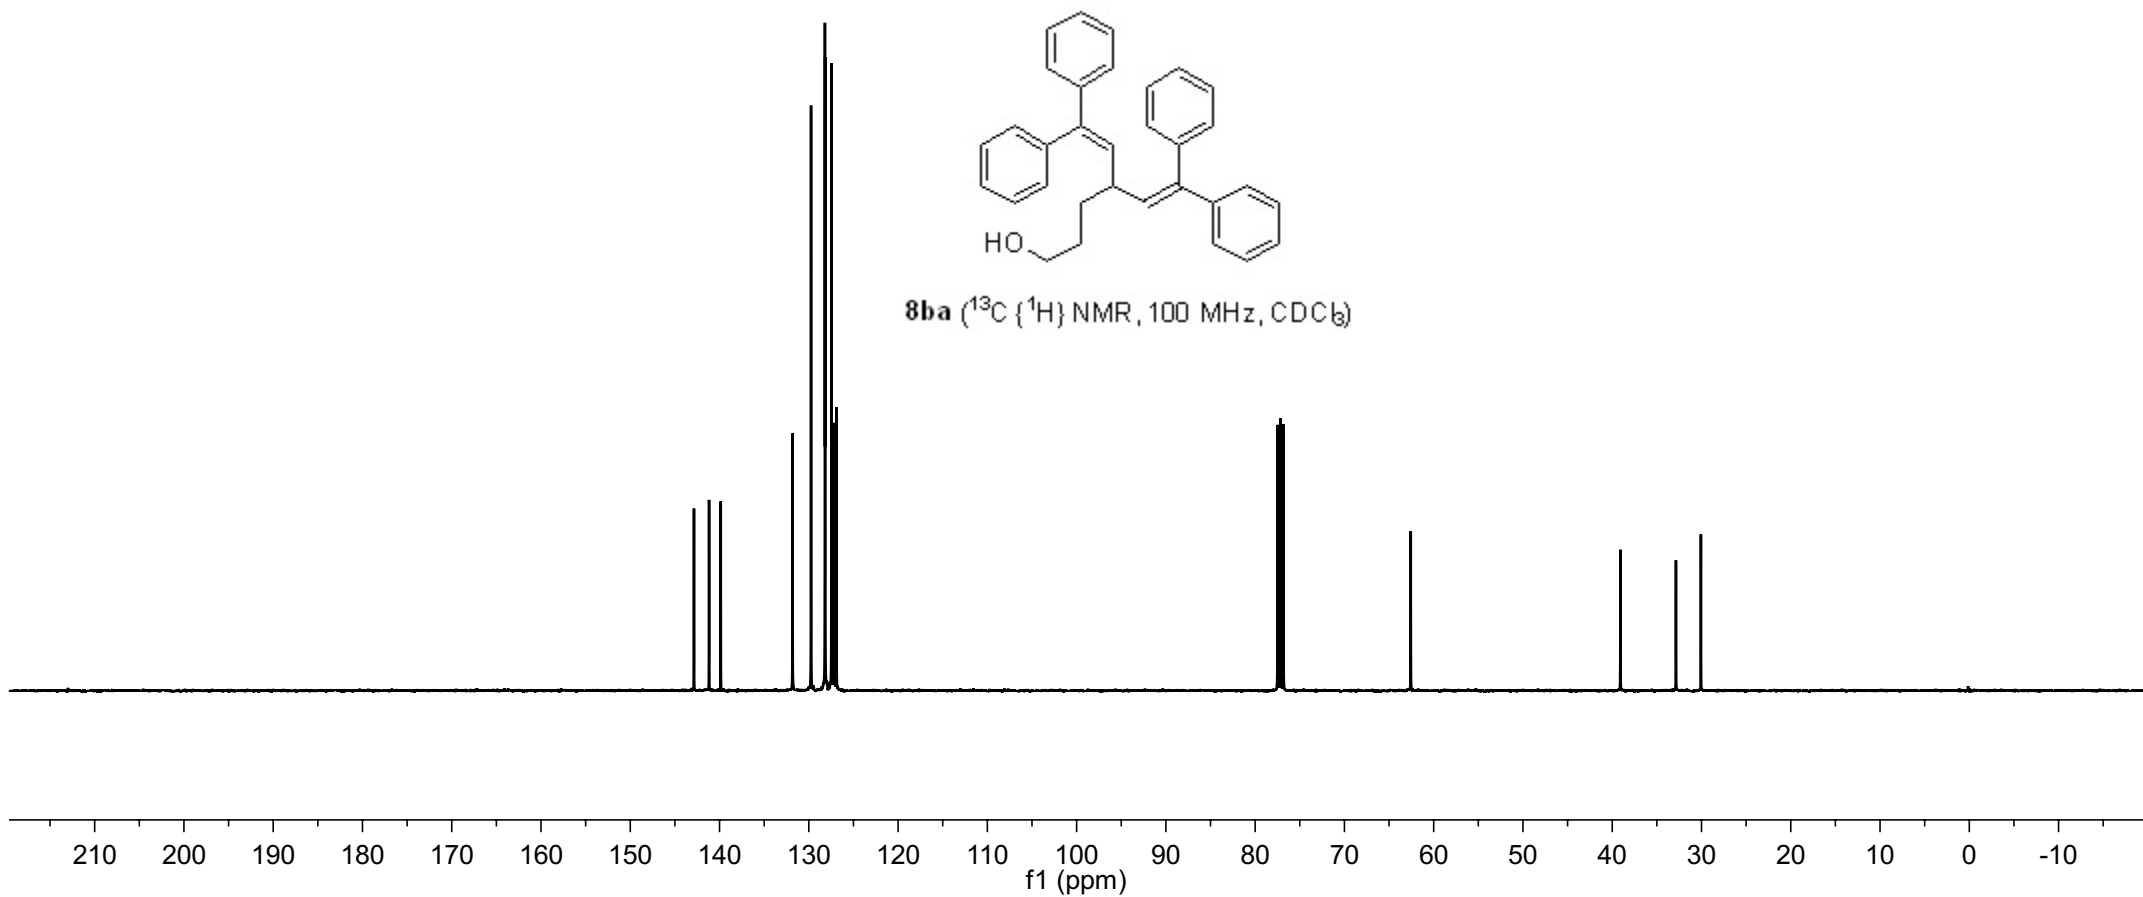

7.142  
7.122  
7.088  
7.067  
6.977  
6.958  
6.840  
6.820

5.915  
5.890

3.417  
3.402  
3.388  
3.307  
3.290  
3.282  
3.266  
3.249  
3.241  
3.224  
2.370  
2.338

1.552  
1.536  
1.522  
1.509  
1.128

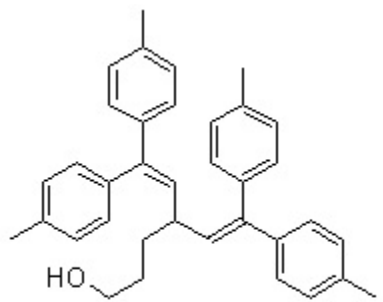

8bf (<sup>1</sup>H NMR, 400 MHz, CDCl<sub>3</sub>)

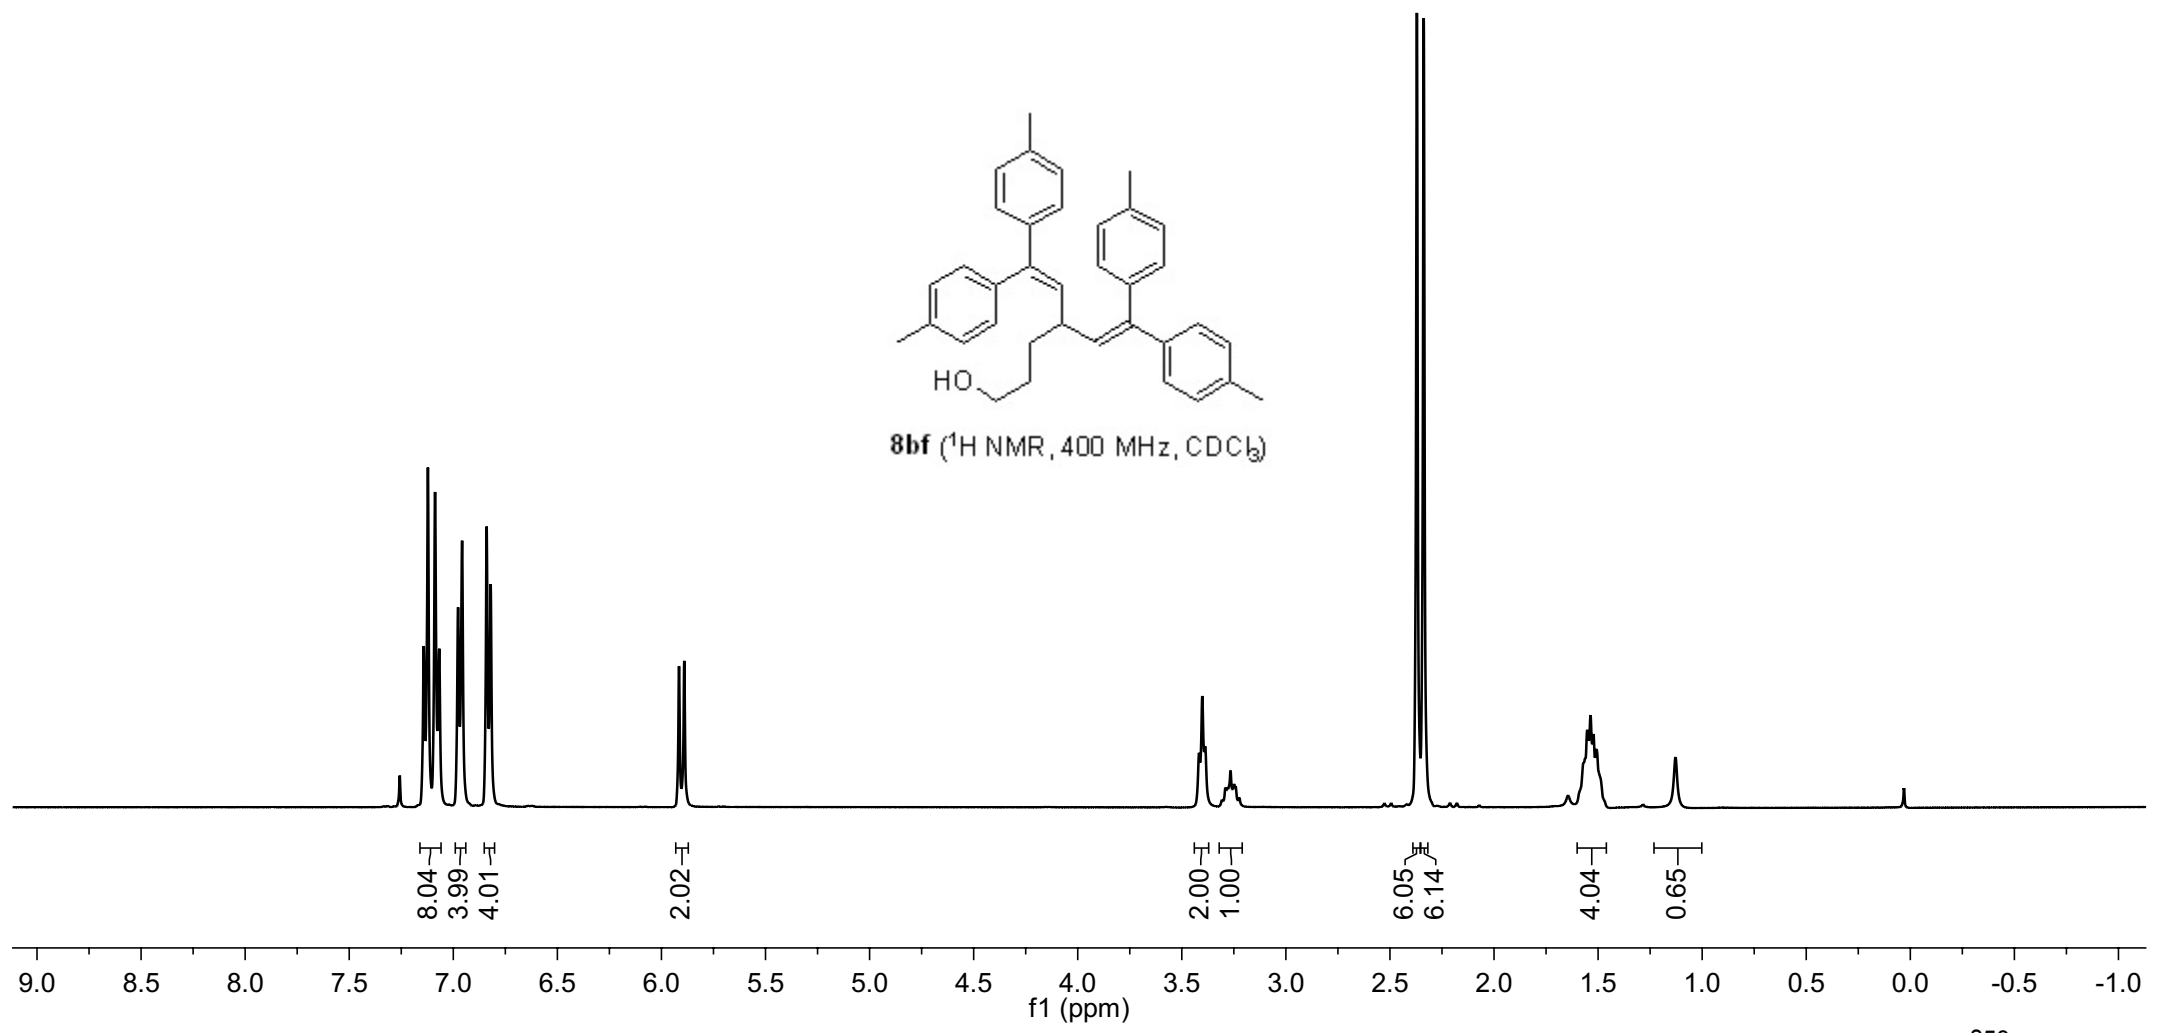

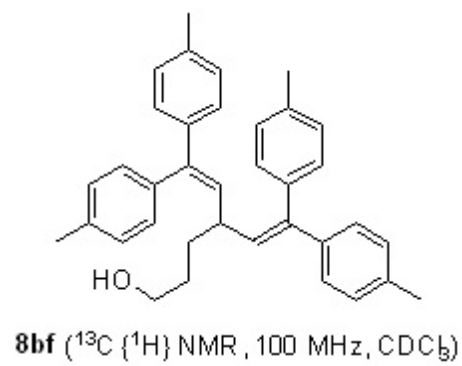

140.742  
140.375  
137.170  
136.774  
136.190  
131.074  
129.678  
128.862  
128.719  
127.392

—62.779

~39.097  
~32.954  
~30.191

~21.344  
~21.172

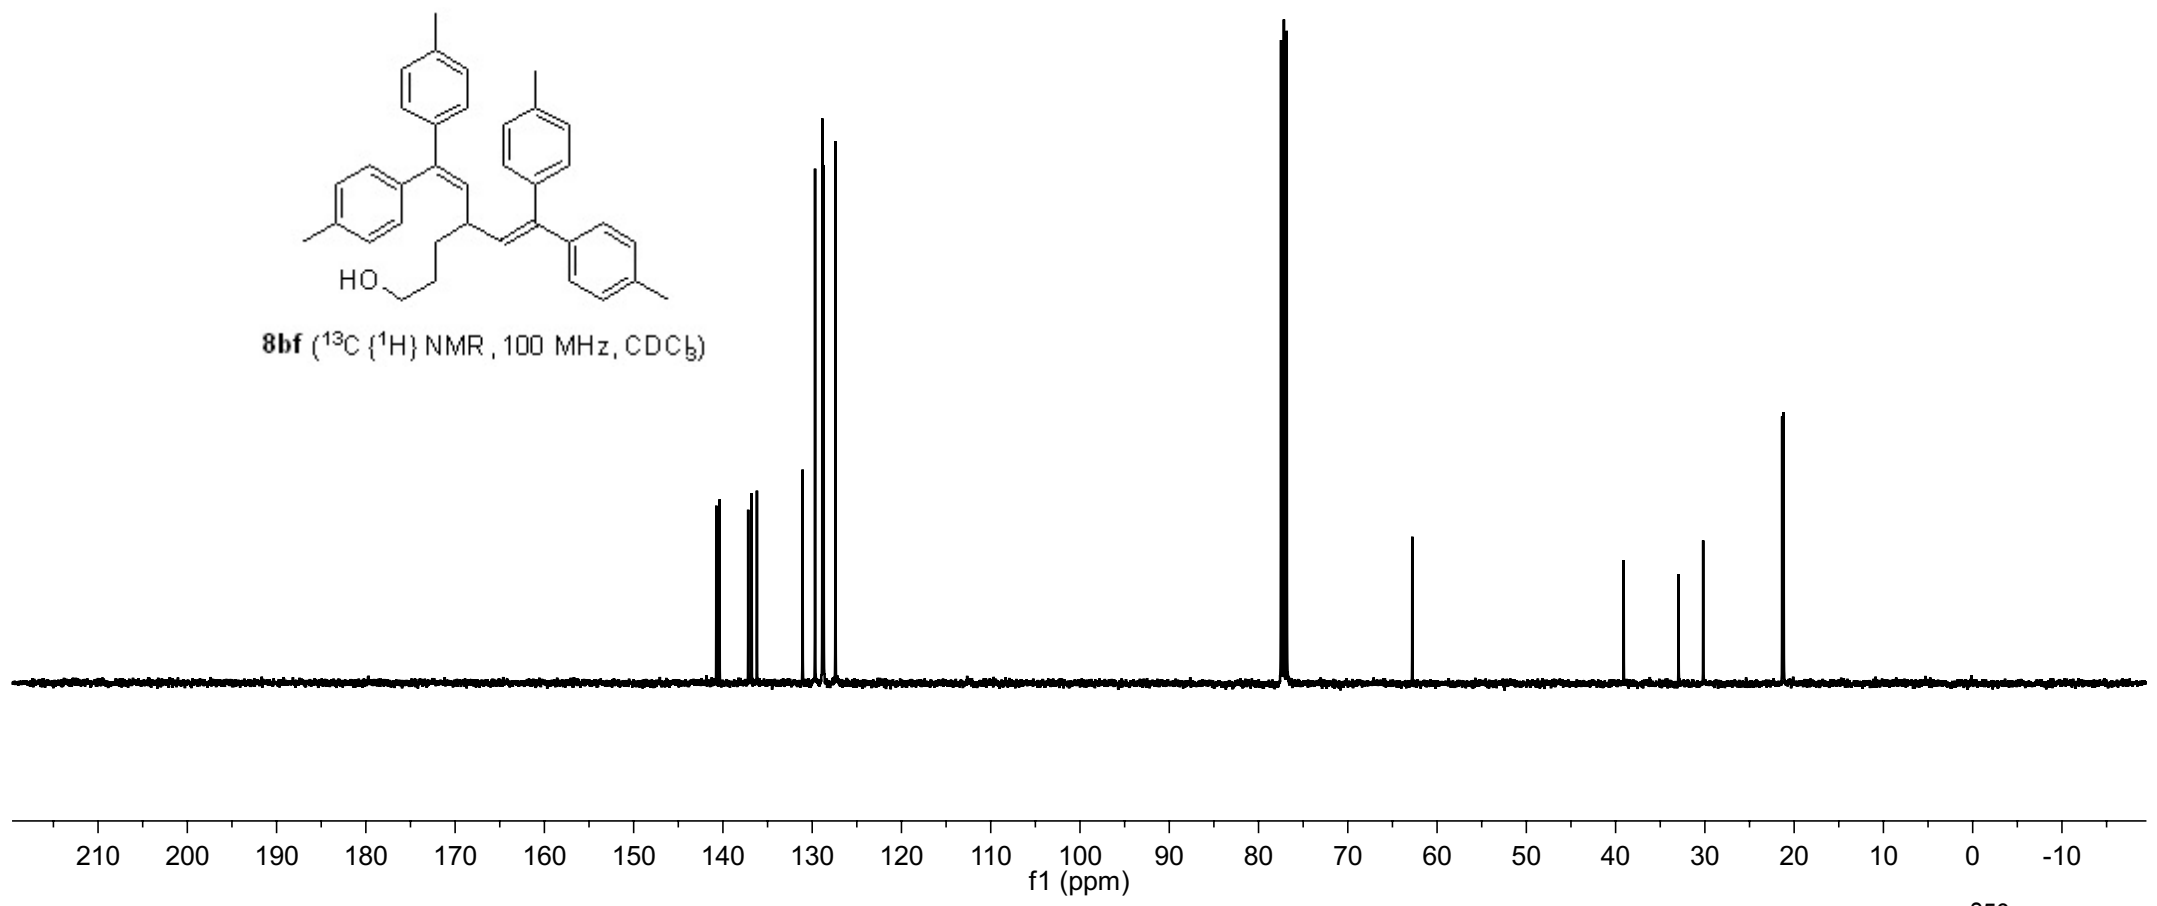



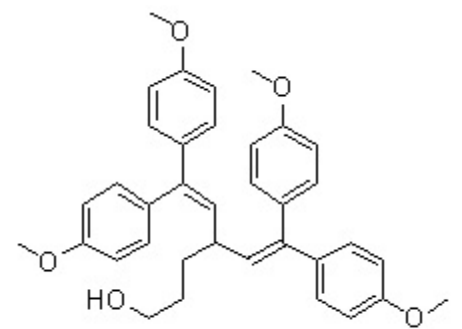

**8bg** ( $^{13}\text{C}$   $\{^1\text{H}\}$  NMR, 100 MHz,  $\text{CDCl}_3$ )

158.907  
158.473  
139.868  
136.026  
132.584  
130.879  
130.293  
128.617  
113.543  
113.437

62.767  
55.379  
55.165  
39.177  
33.104  
30.237

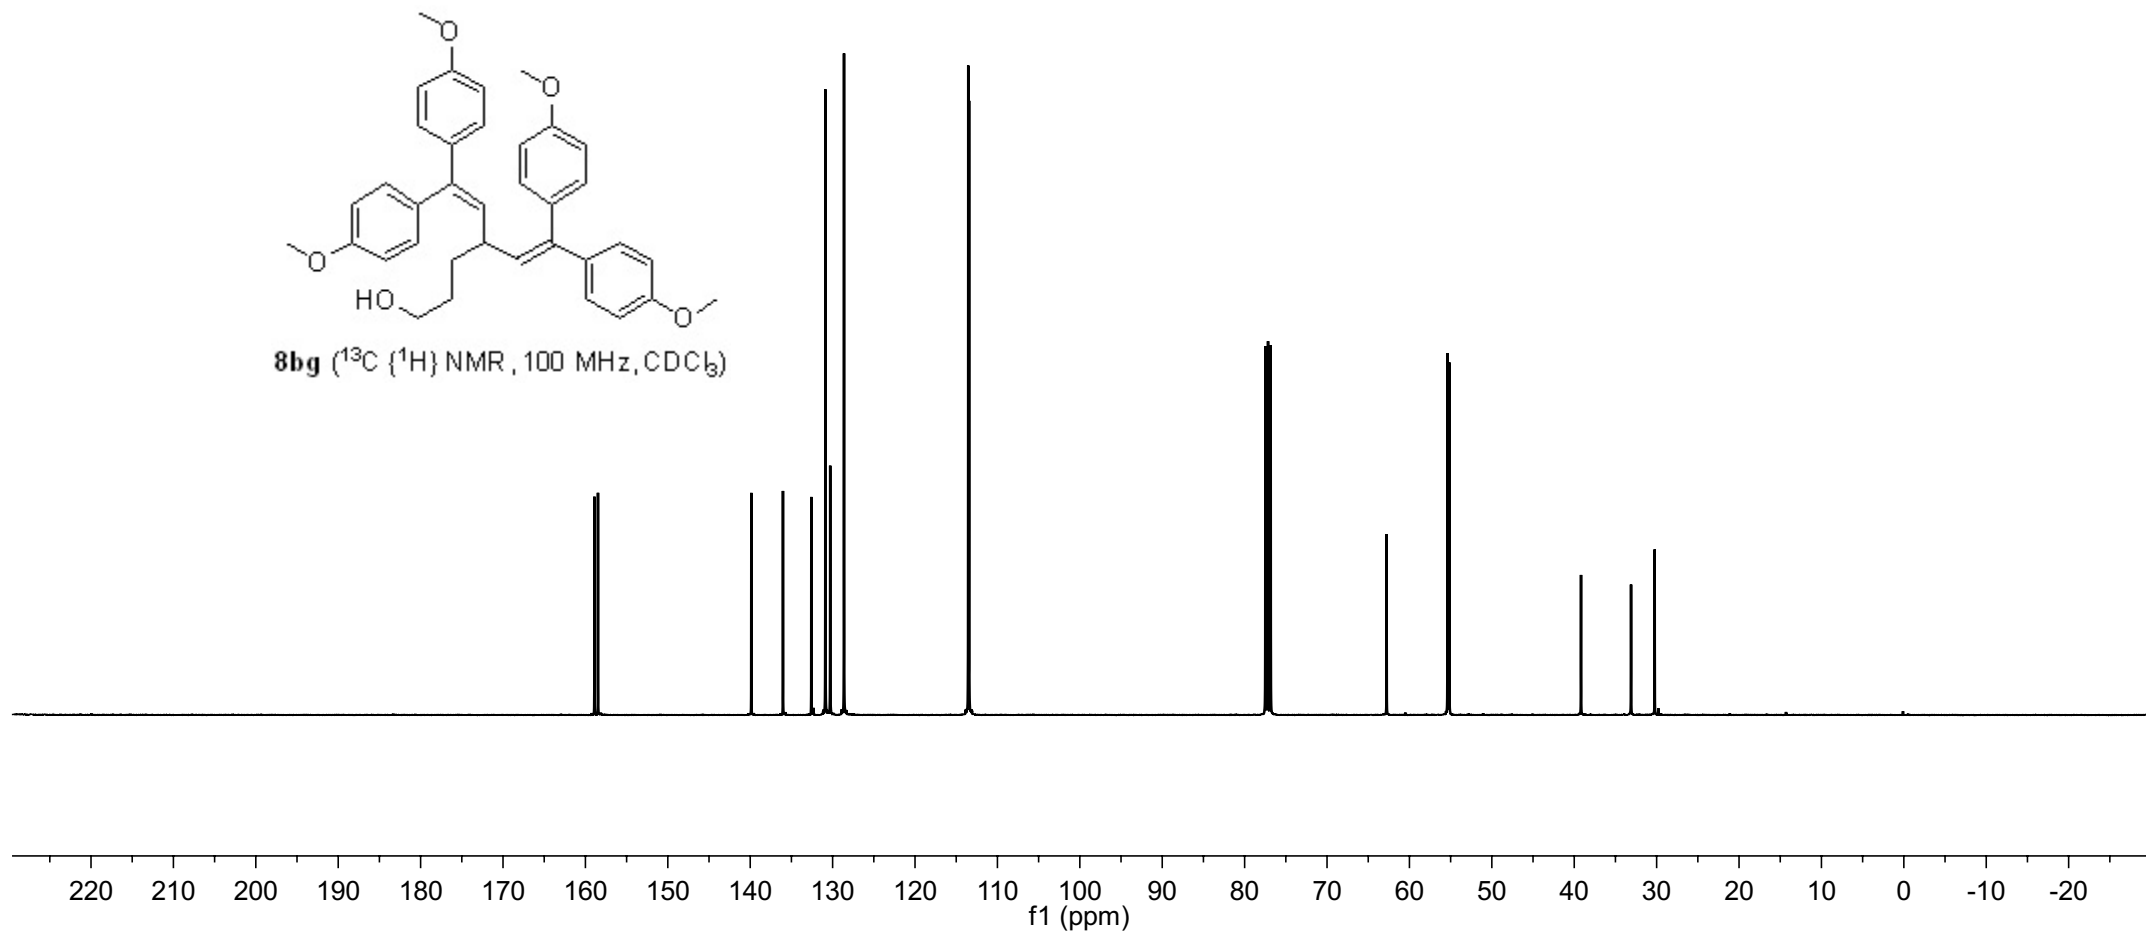

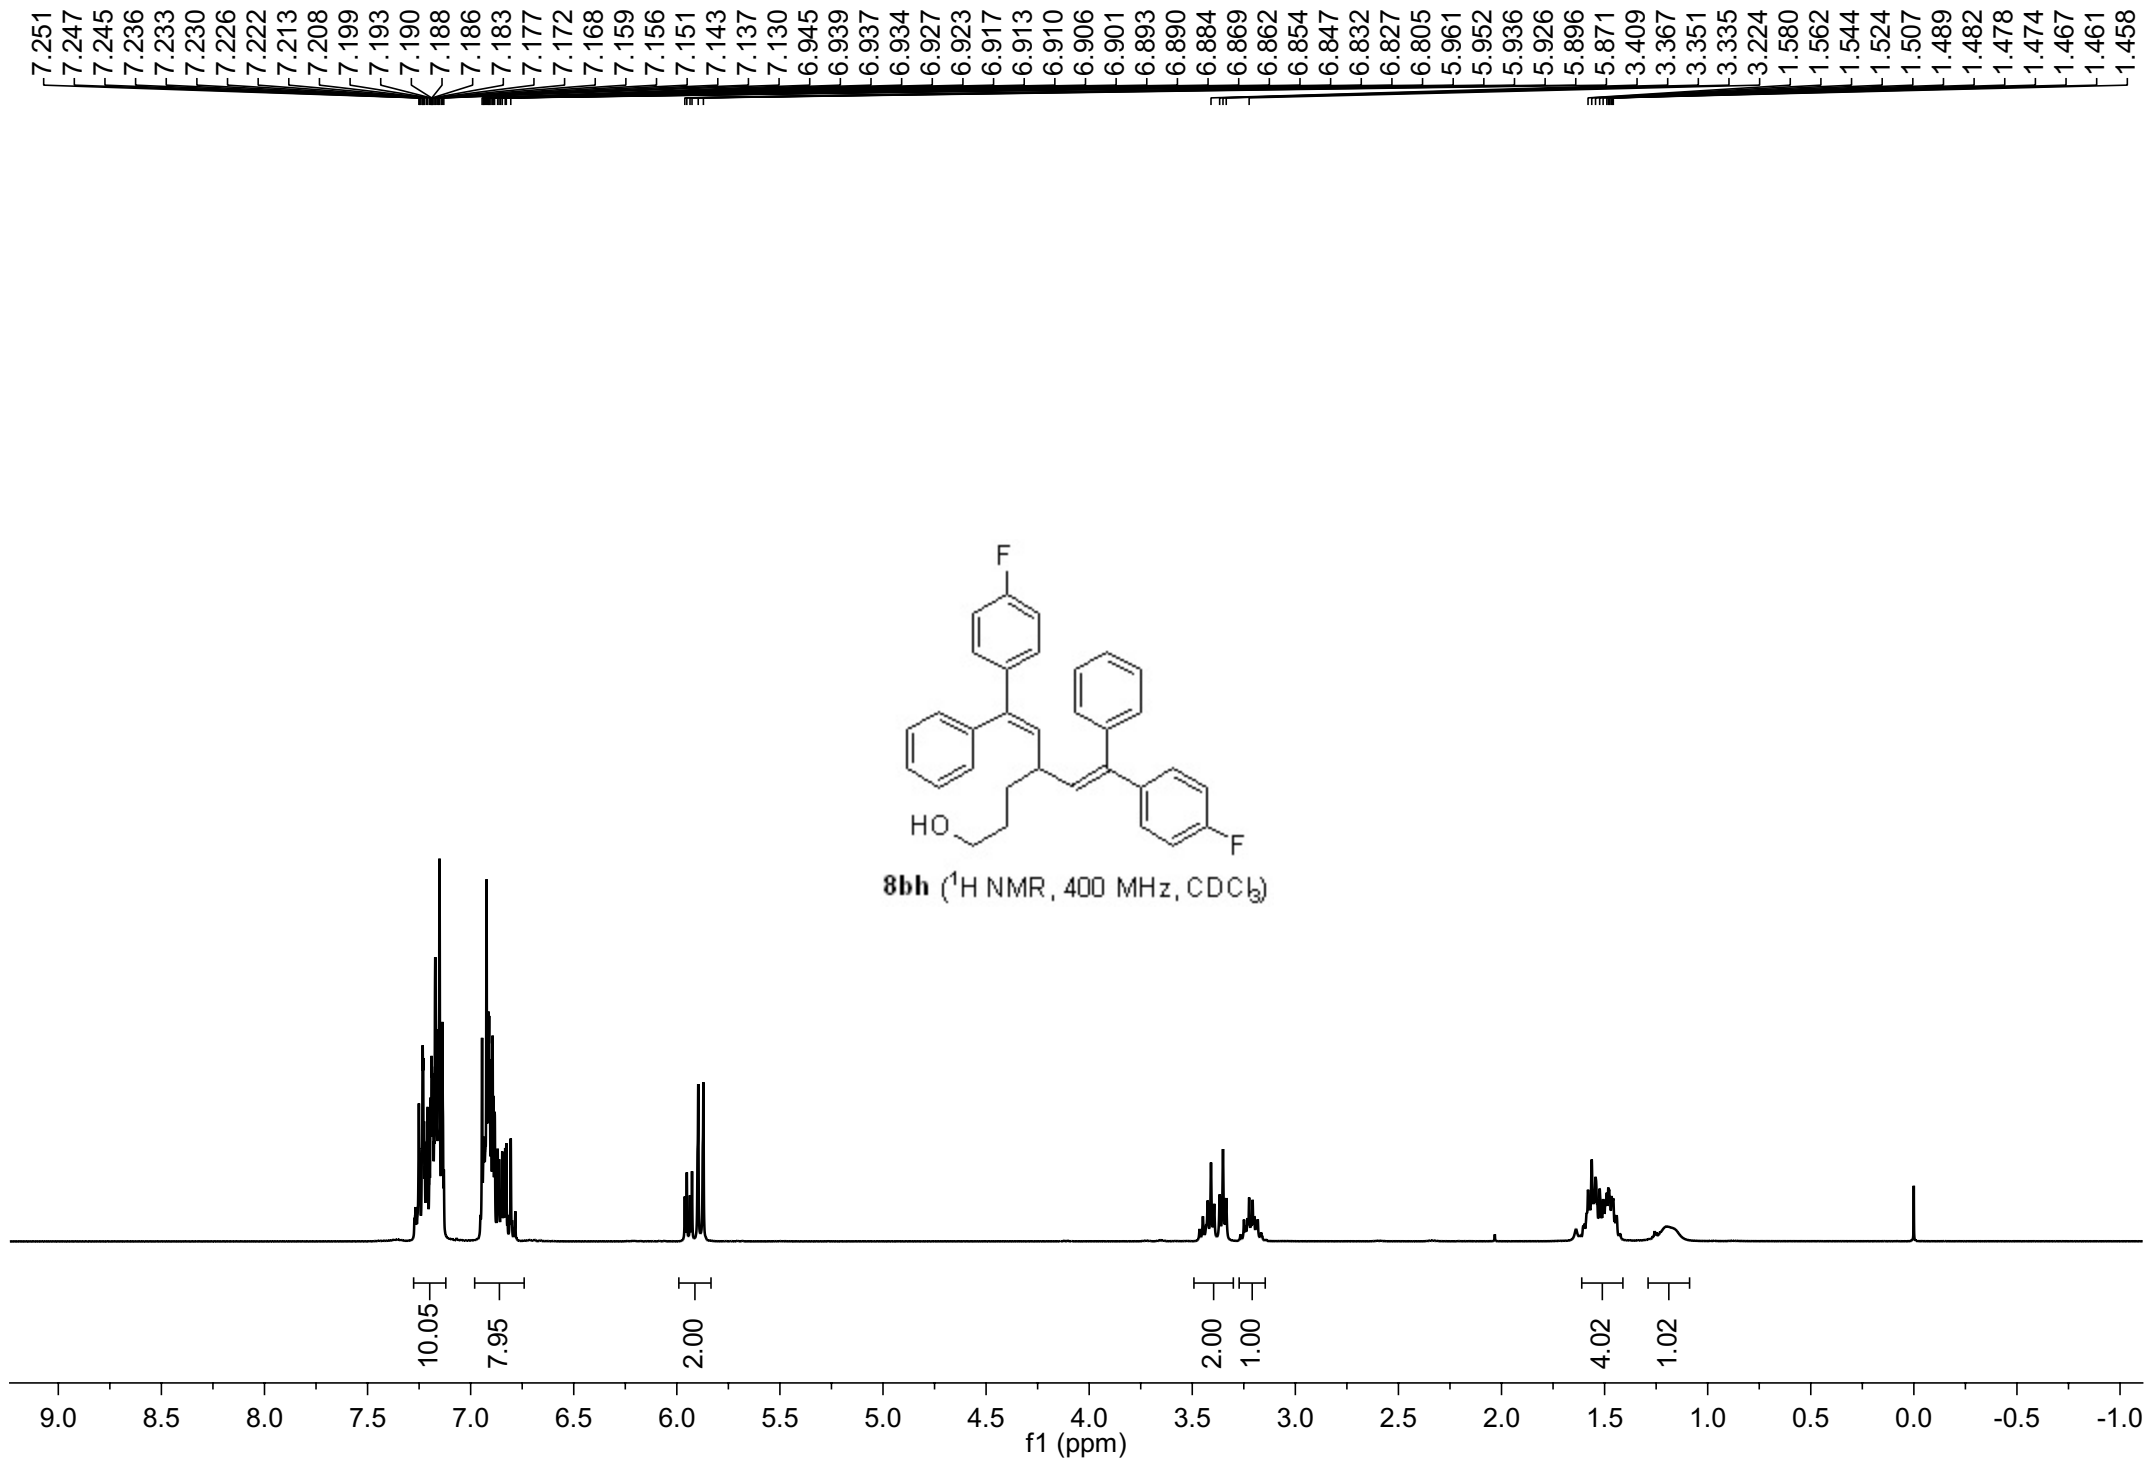

163.437  
163.143  
163.050  
160.989  
160.697  
160.608  
140.279  
131.527  
129.636  
129.055  
128.976  
128.267  
127.408  
127.083  
117.180  
115.154  
115.111  
114.968  
114.942  
114.899  
62.610  
62.541  
39.376  
39.270  
39.107  
32.865  
30.189  
30.129  
30.045

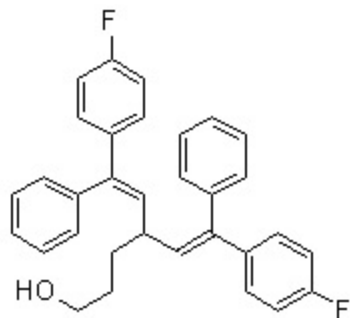

8bh ( $^{13}\text{C}$  { $^1\text{H}$ } NMR, 100 MHz,  $\text{CDCl}_3$ )

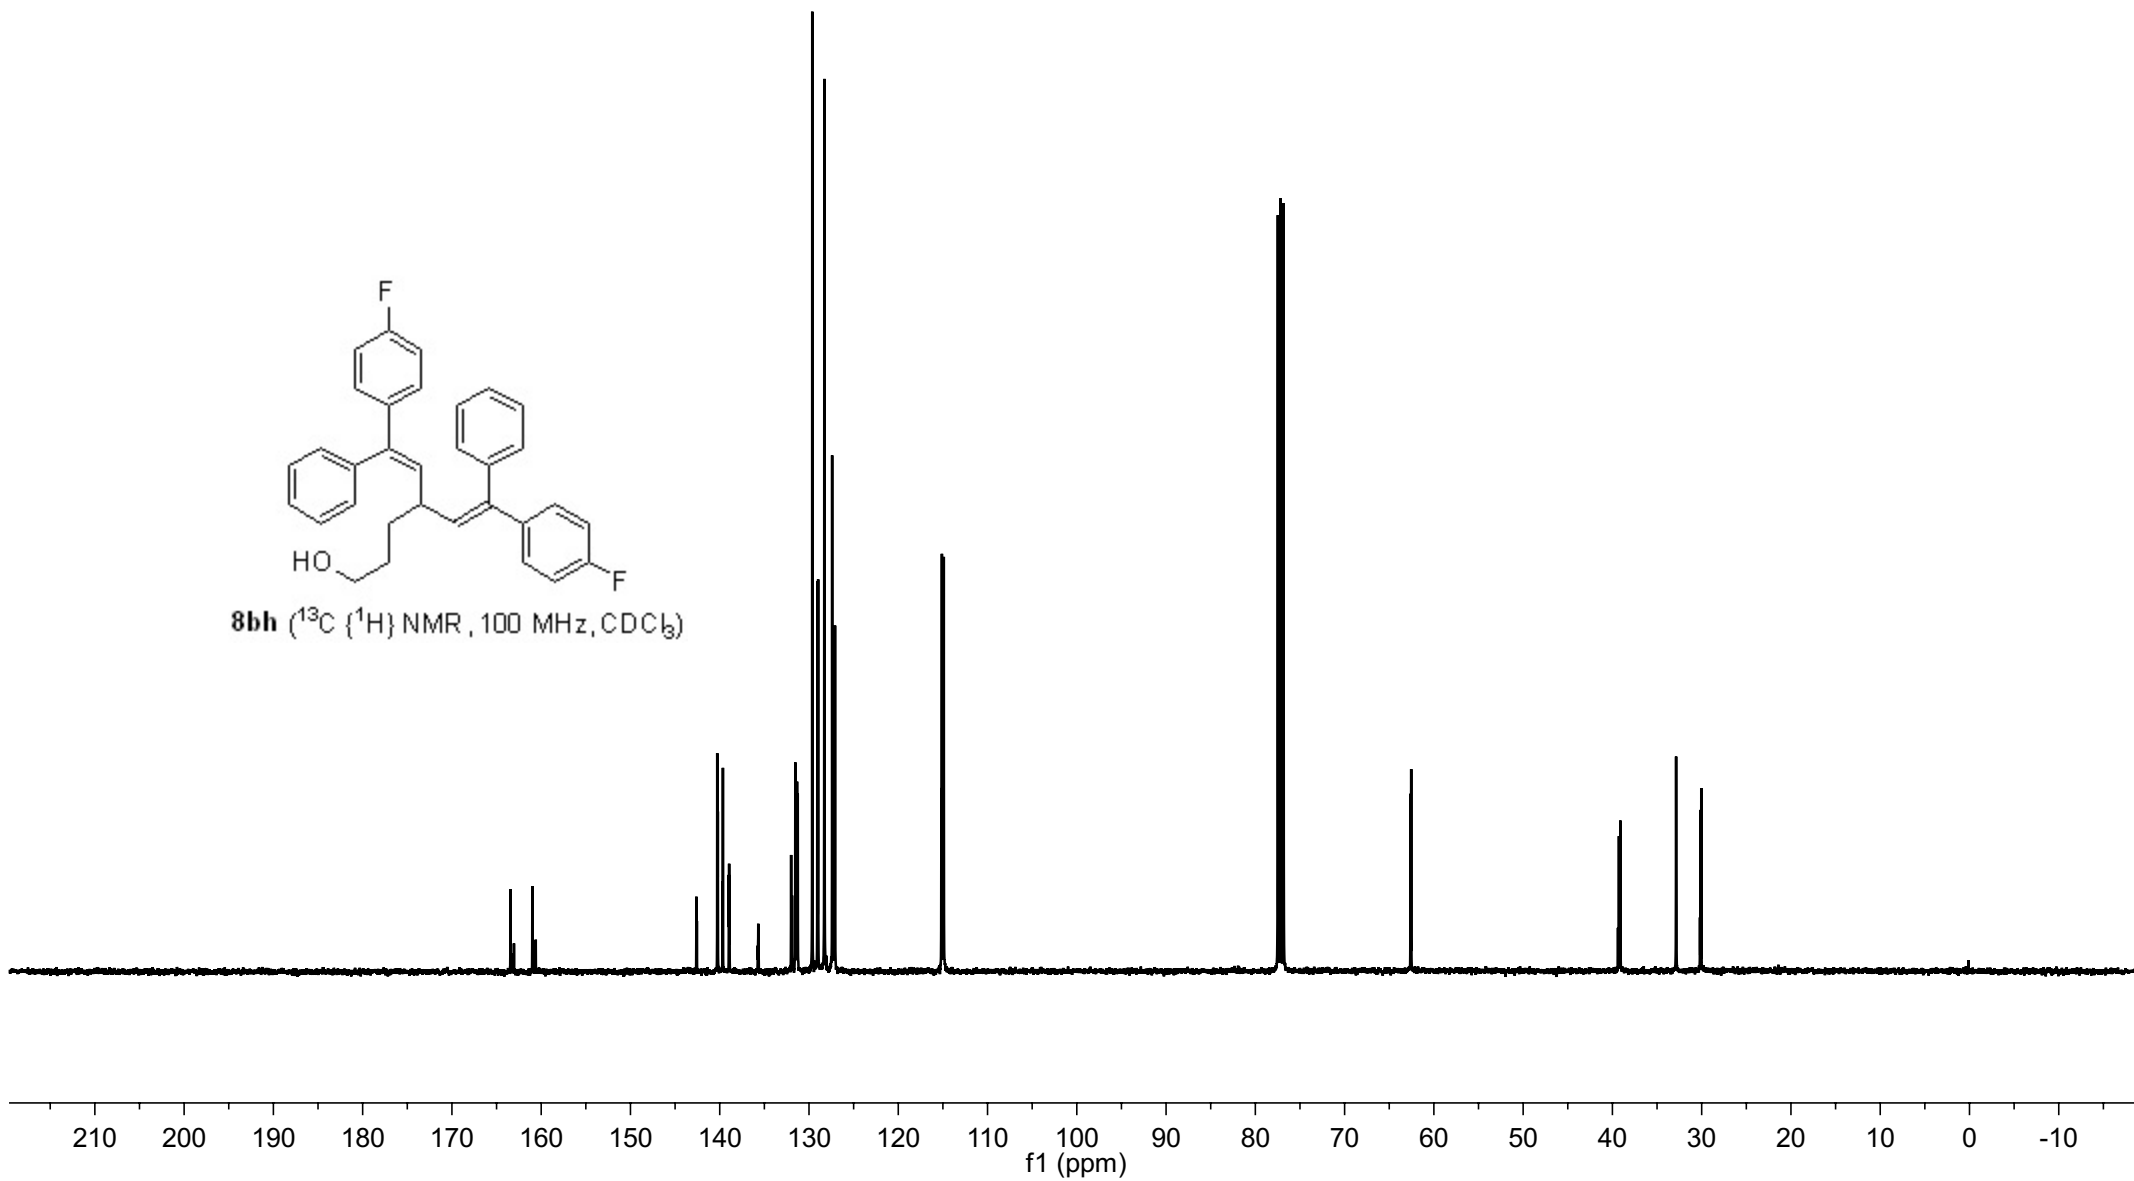



115.174  
115.181  
115.522  
115.532  
115.551  
115.563  
115.593  
115.604

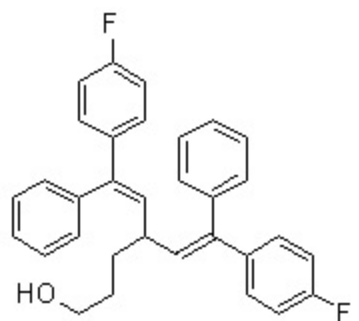

**8bh** ( $^{19}\text{F}$  NMR, 376 MHz,  $\text{CDCl}_3$ )

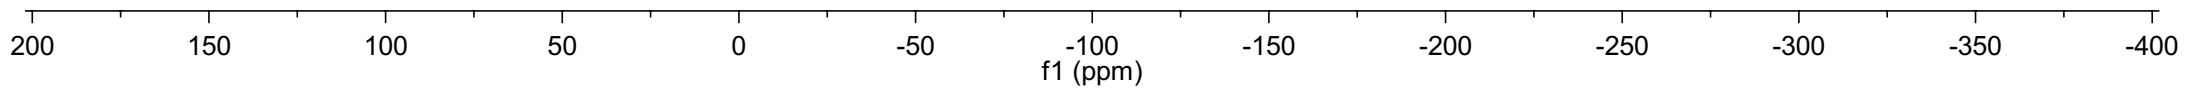

7.227  
7.213  
7.201  
7.193  
7.187  
7.170  
7.154  
7.136  
7.118  
7.114  
7.103  
7.083  
7.054  
7.034  
6.964  
6.954  
6.945  
6.925  
6.907  
6.822  
6.802  
5.930  
5.905

3.392  
3.376  
3.364  
3.348  
3.335  
3.320  
3.305  
3.287  
3.270  
3.246  
3.236  
3.228  
3.221  
3.211  
3.204  
3.194  
3.186  
3.169  
2.338  
2.329  
2.300  
1.540  
1.522  
1.513  
1.502  
1.486  
1.475

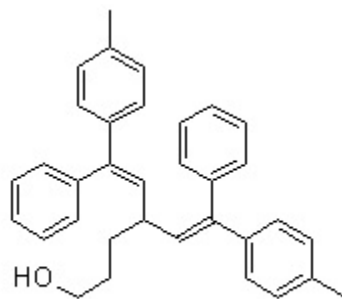

8bi (<sup>1</sup>H NMR, 400 MHz, CDCl<sub>3</sub>)

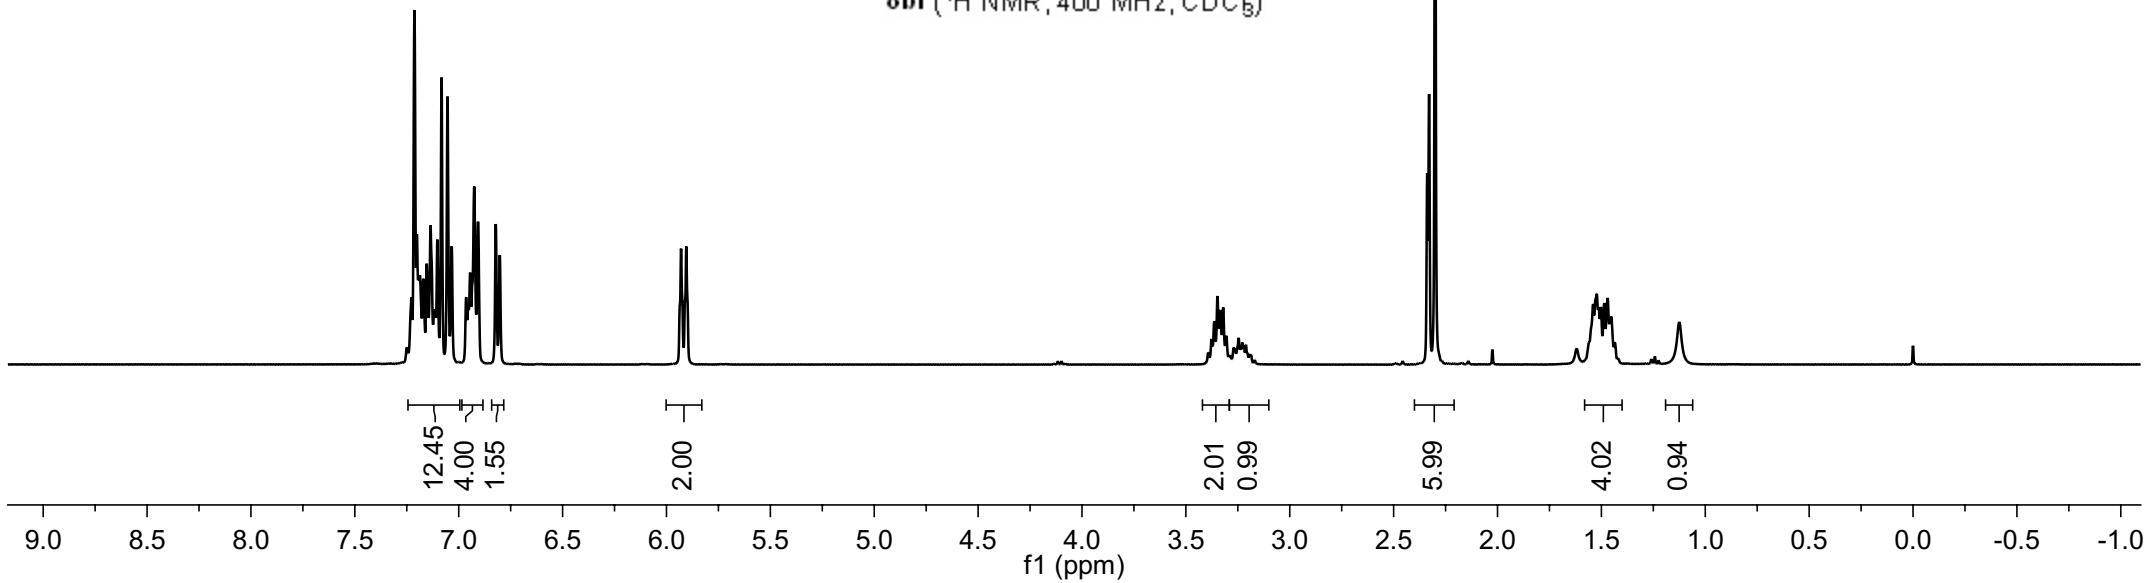

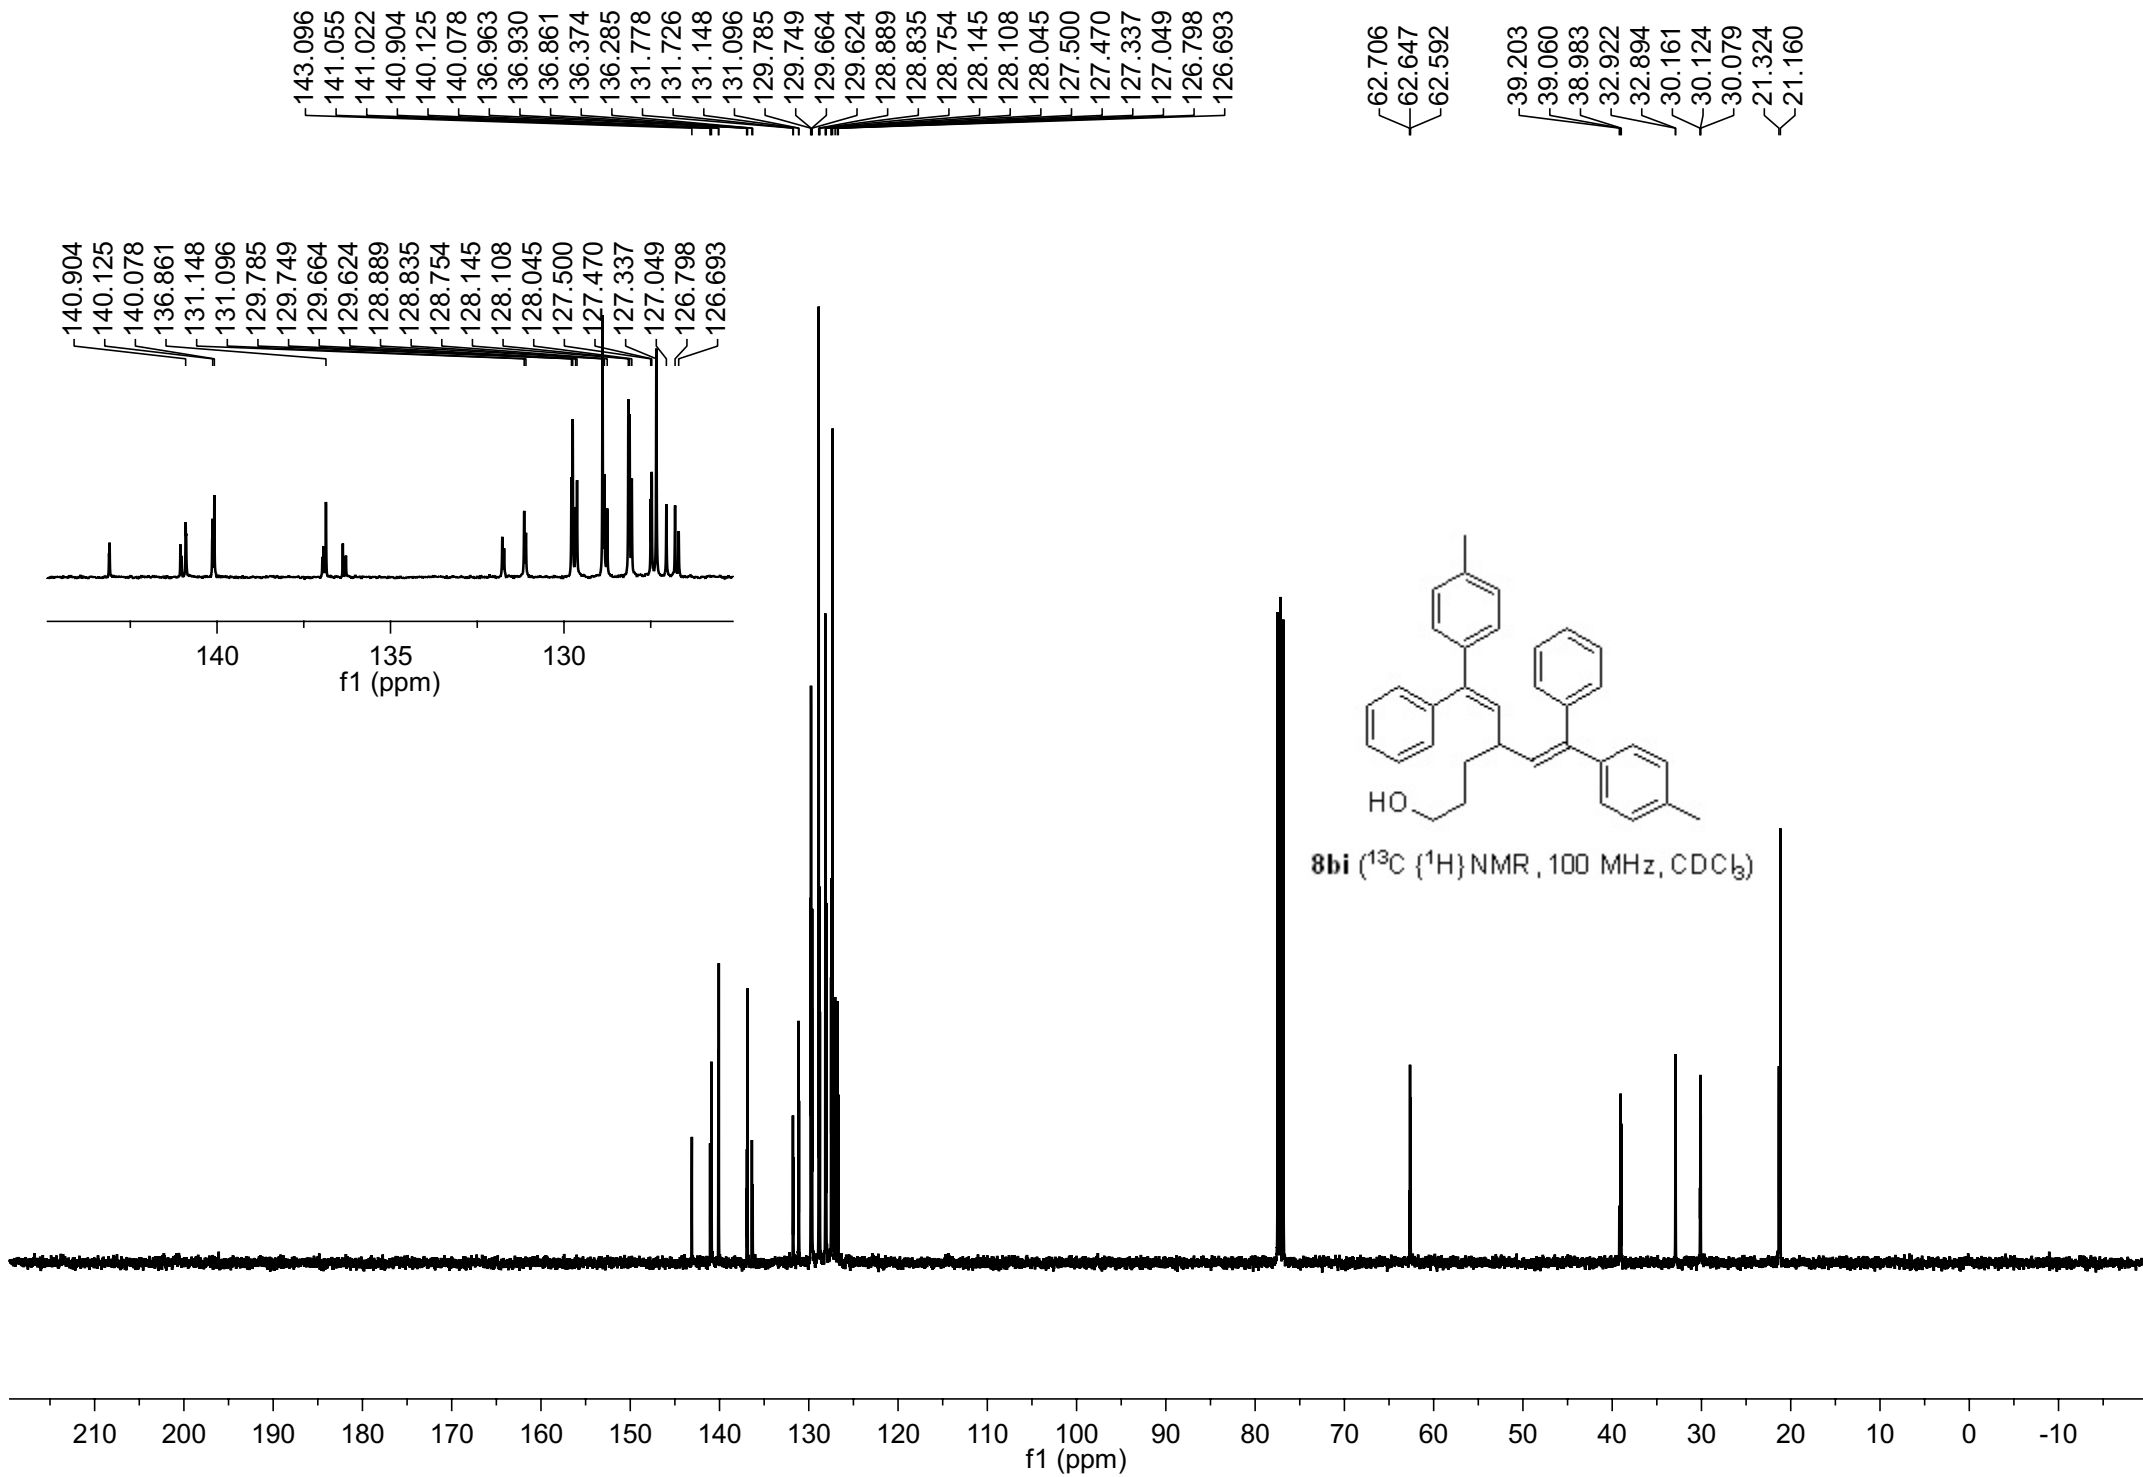

7.228  
7.218  
7.196  
7.187  
7.180  
7.168  
7.154  
7.136  
7.118  
7.106  
7.087  
7.006  
6.989  
6.929  
6.911  
6.888  
6.869  
6.751  
6.740  
5.919  
5.911  
5.905  
5.894  
5.880

3.350  
3.335  
3.320  
3.305  
3.291  
3.273  
3.265  
3.248  
3.229  
3.203  
3.185  
3.178  
3.160

2.251  
2.238  
2.213  
2.193  
2.145  
1.539  
1.521  
1.500  
1.475

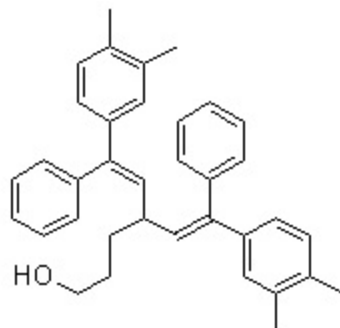

**8bj** (<sup>1</sup>H NMR, 400 MHz, CDCl<sub>3</sub>)

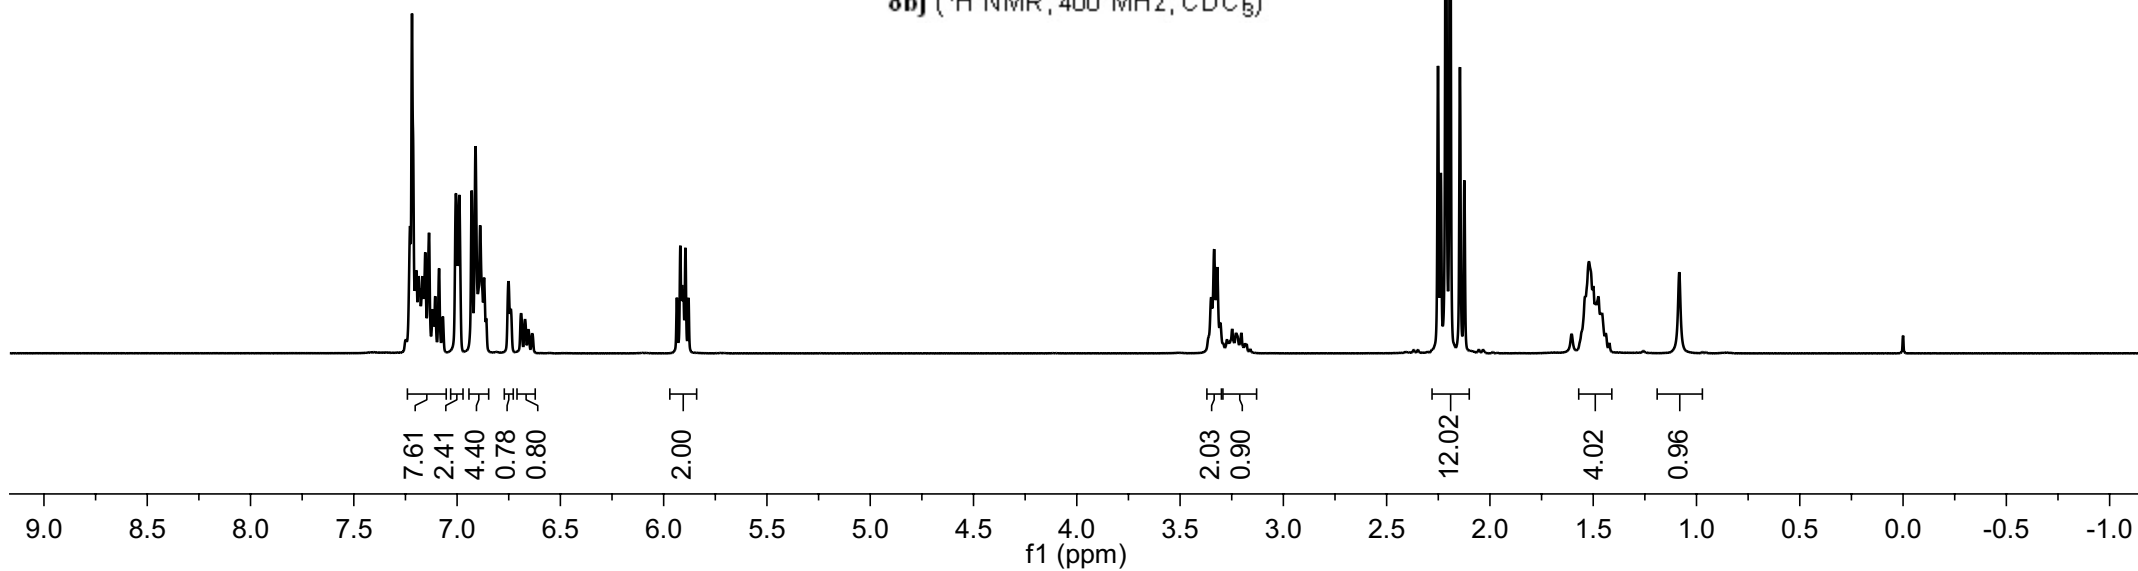

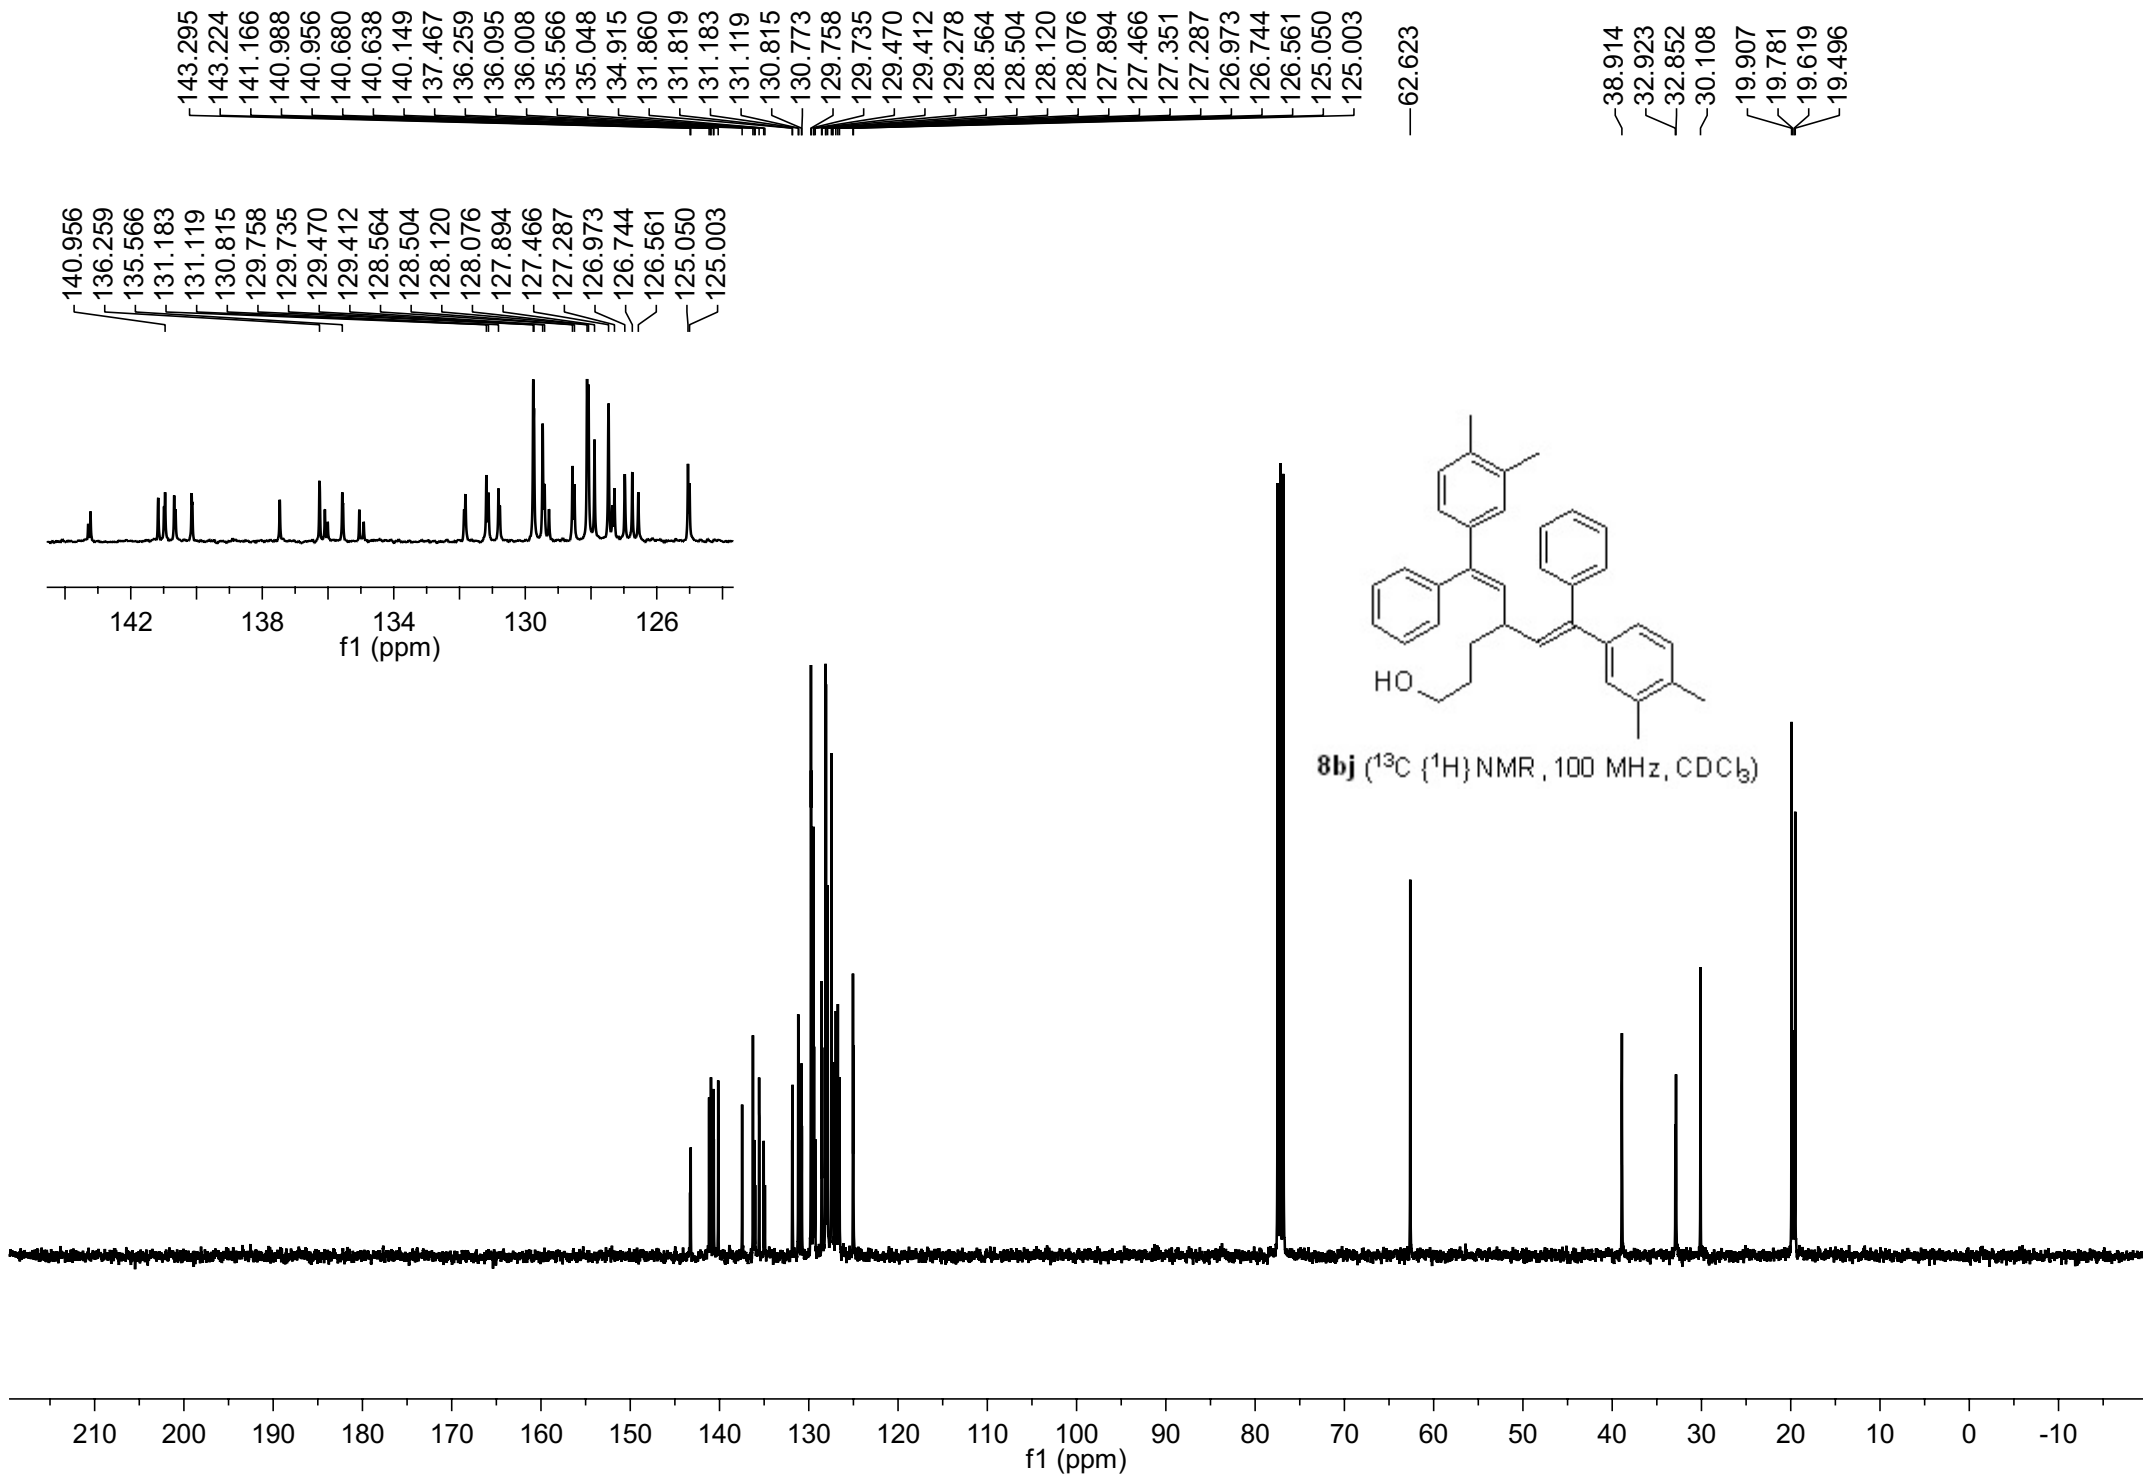

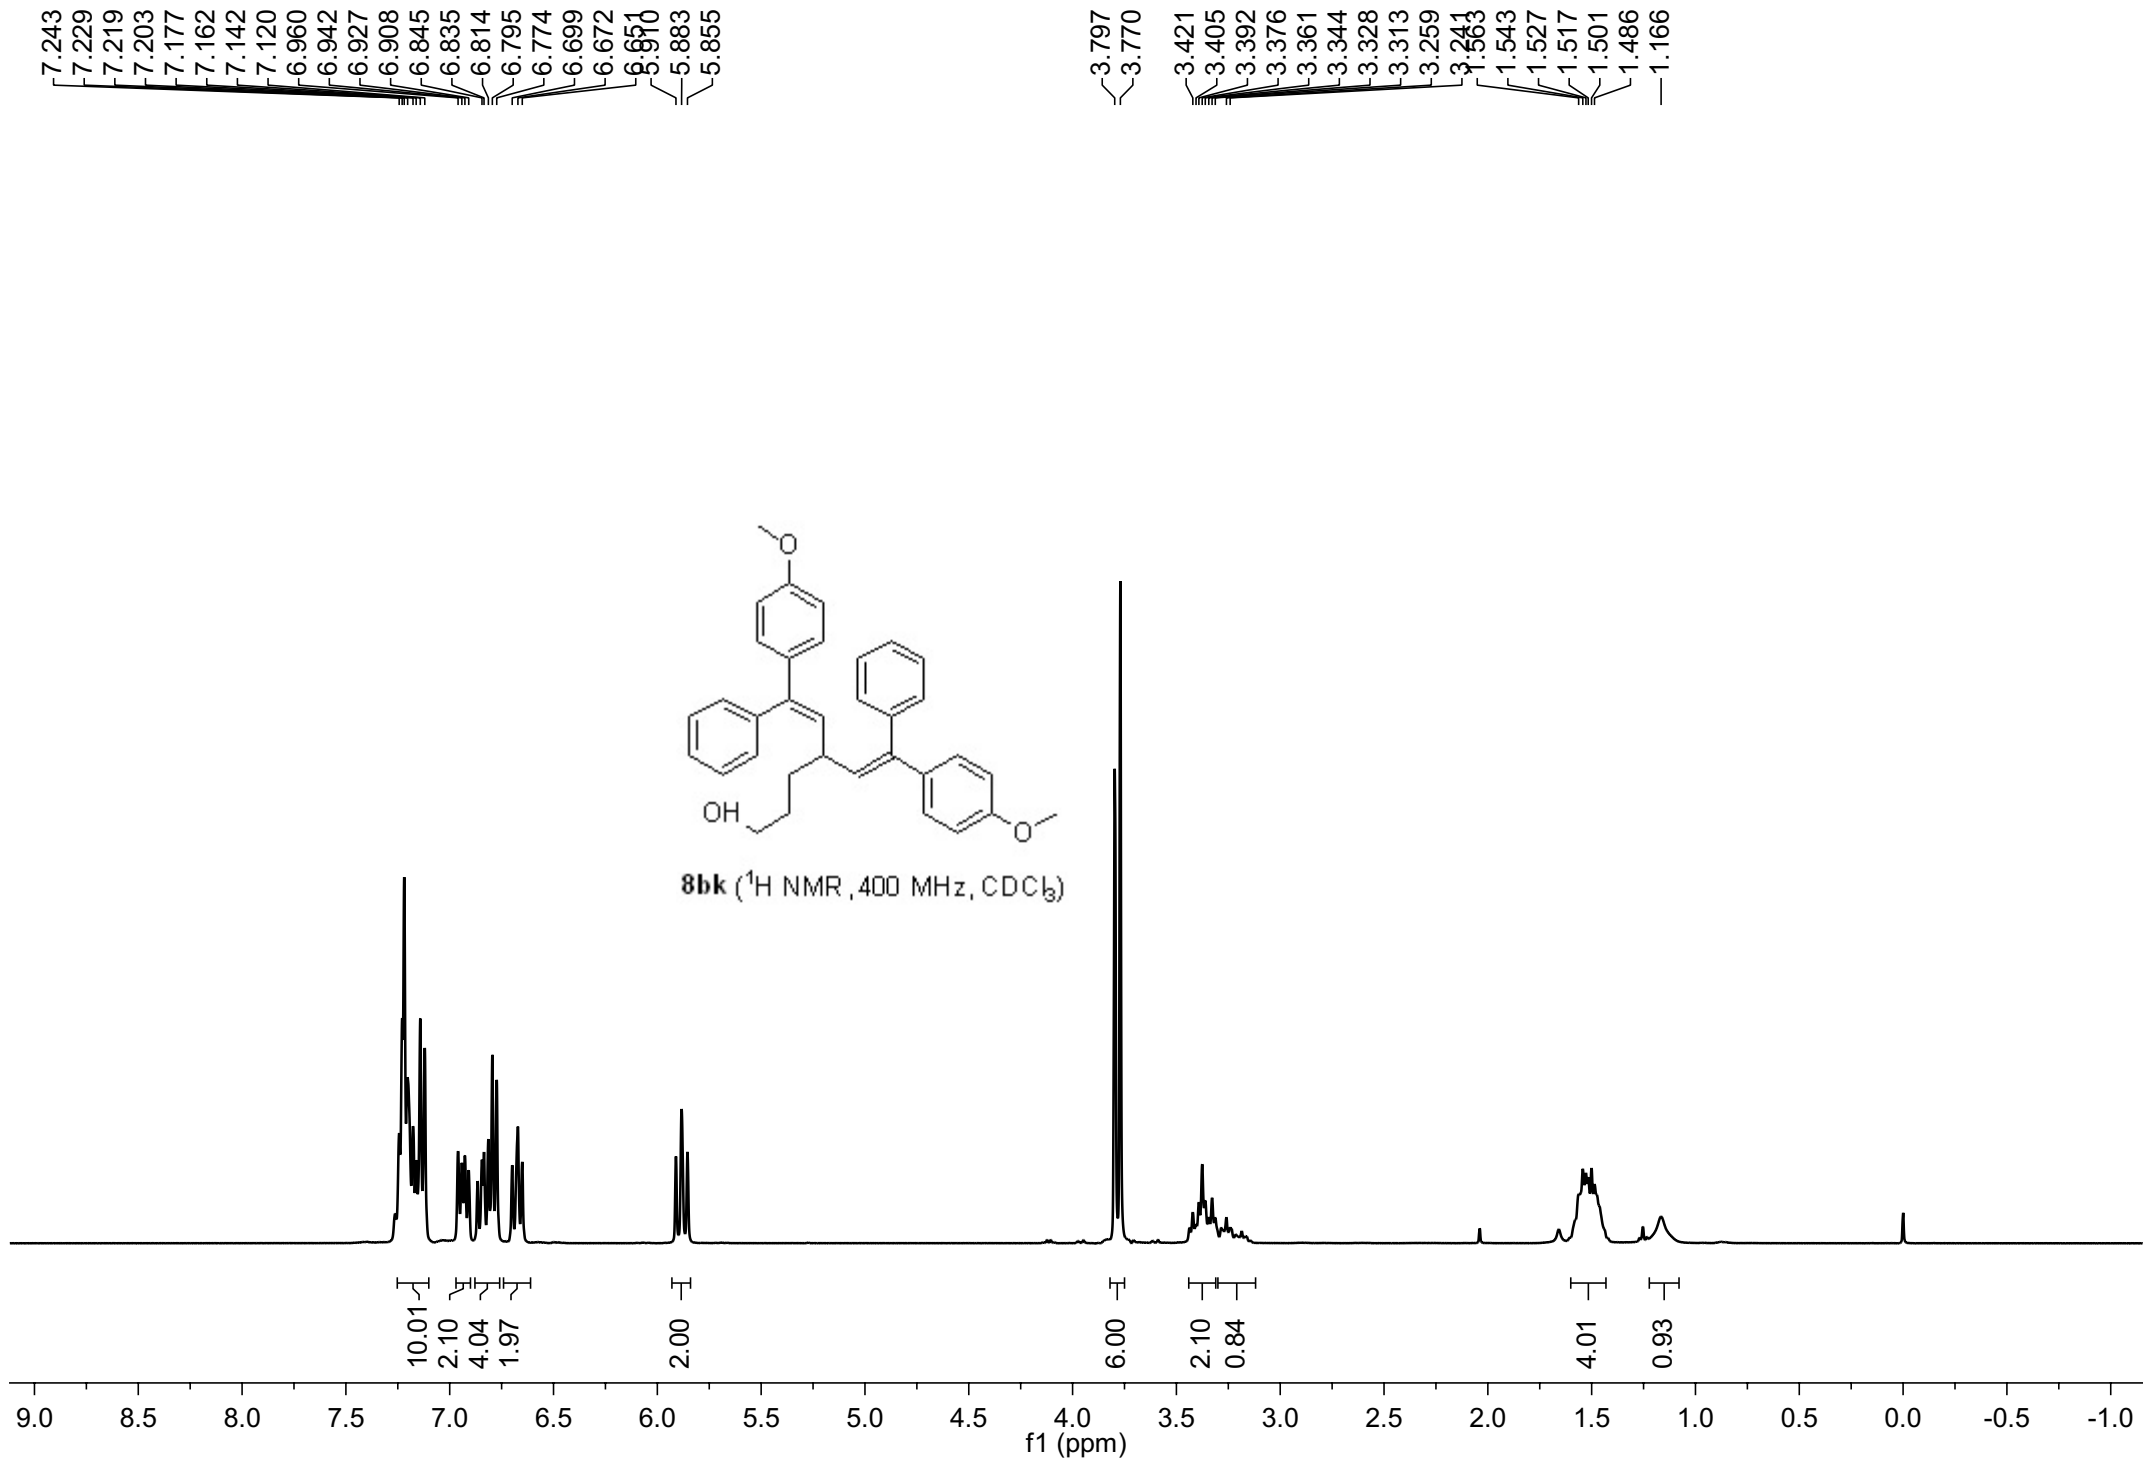

158.944  
158.536  
158.507  
130.867  
129.807  
128.568  
128.531  
128.147  
128.116  
117.533  
113.584  
113.525  
113.486

62.737  
62.684  
62.622  
55.390  
55.300  
55.179  
39.296  
39.127  
38.977  
33.005  
32.955  
30.230  
30.169  
30.105

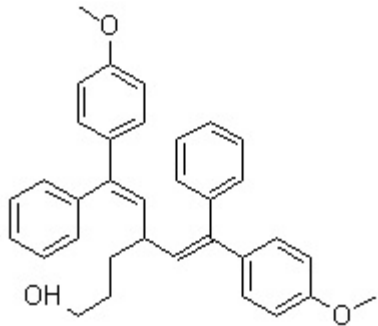

8bk (<sup>13</sup>C {<sup>1</sup>H} NMR, 100 MHz, CDCl<sub>3</sub>)

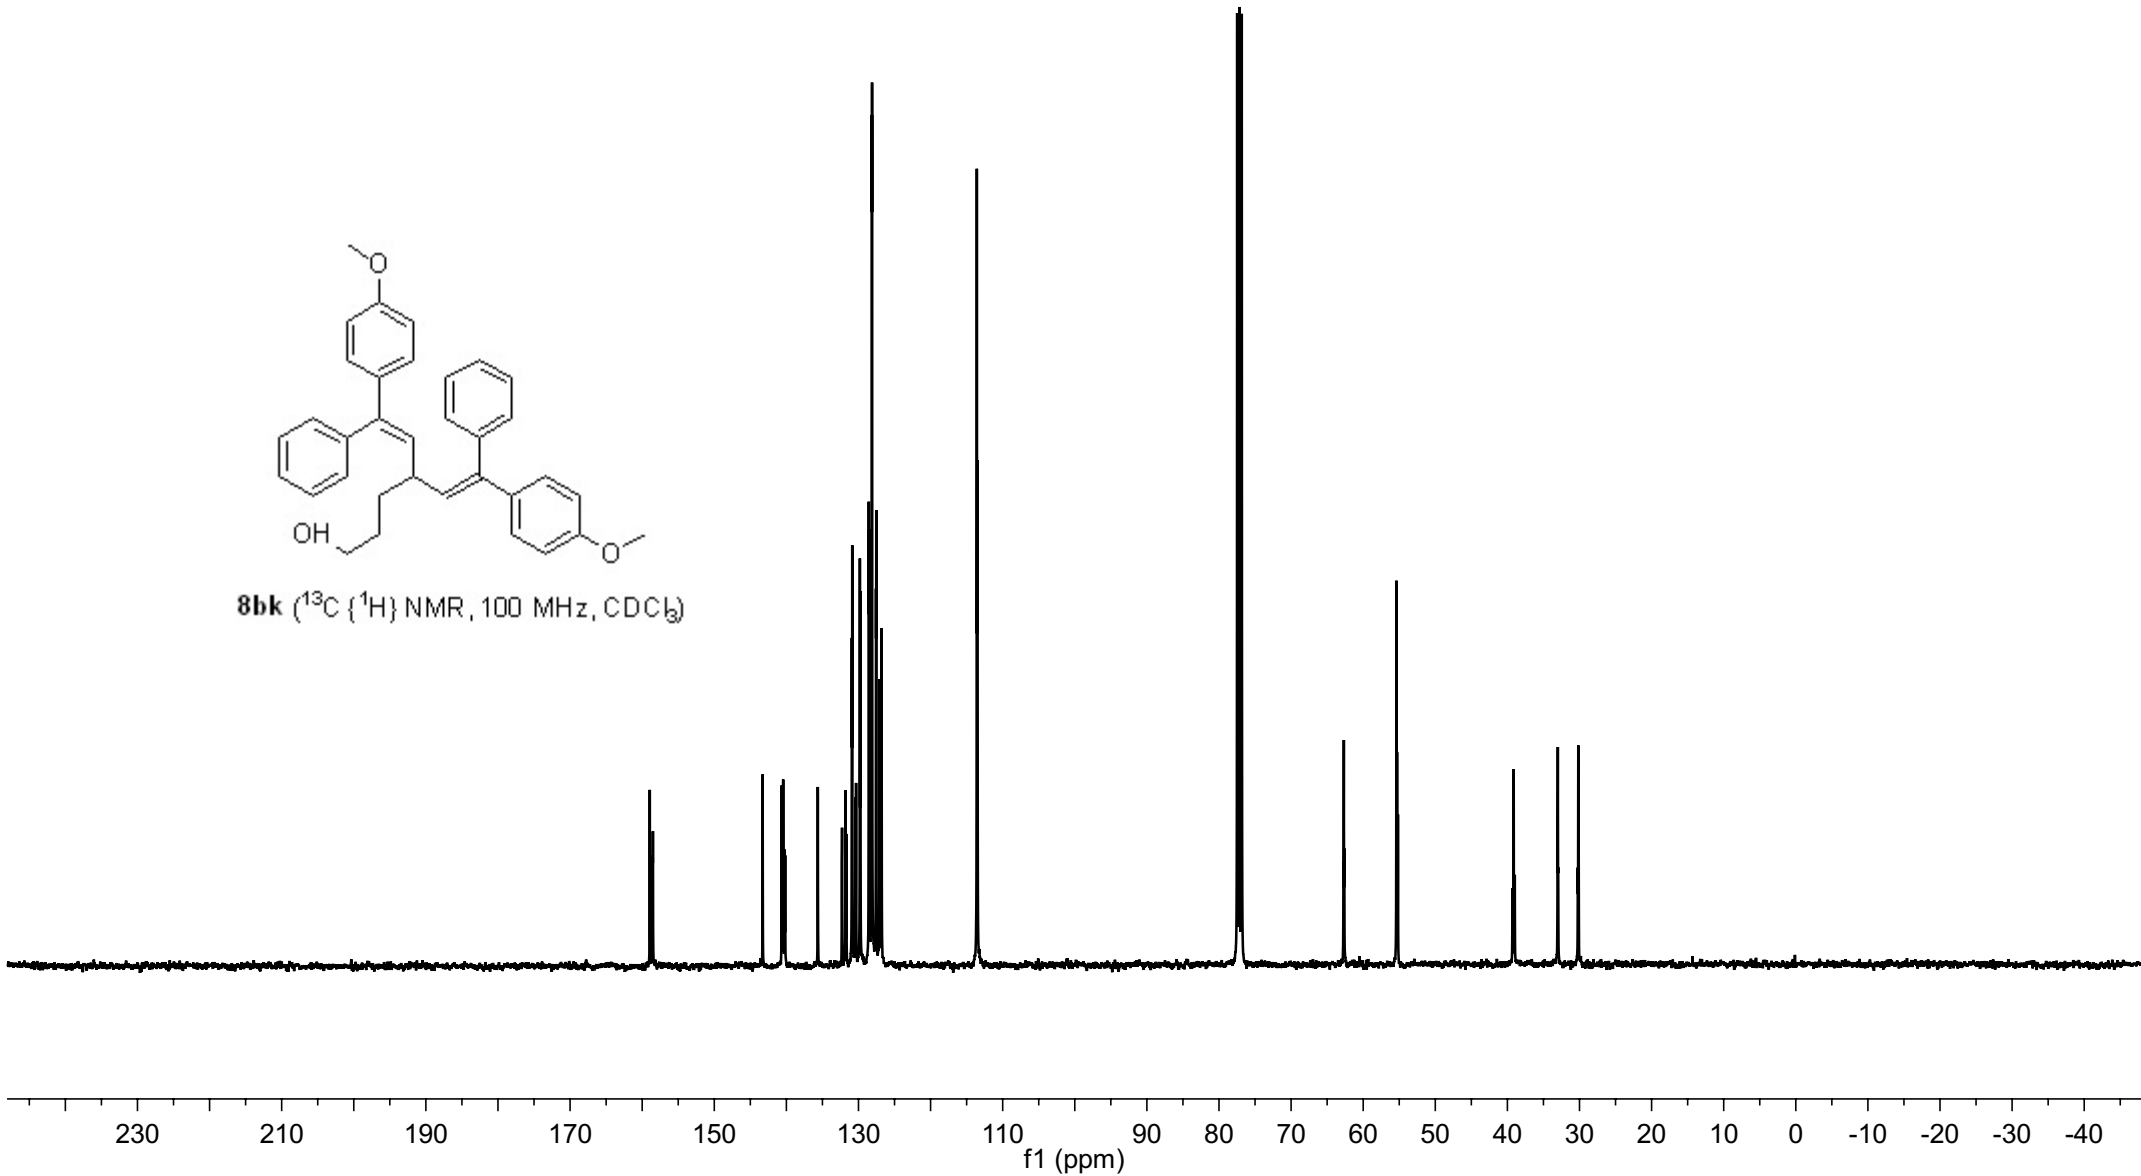

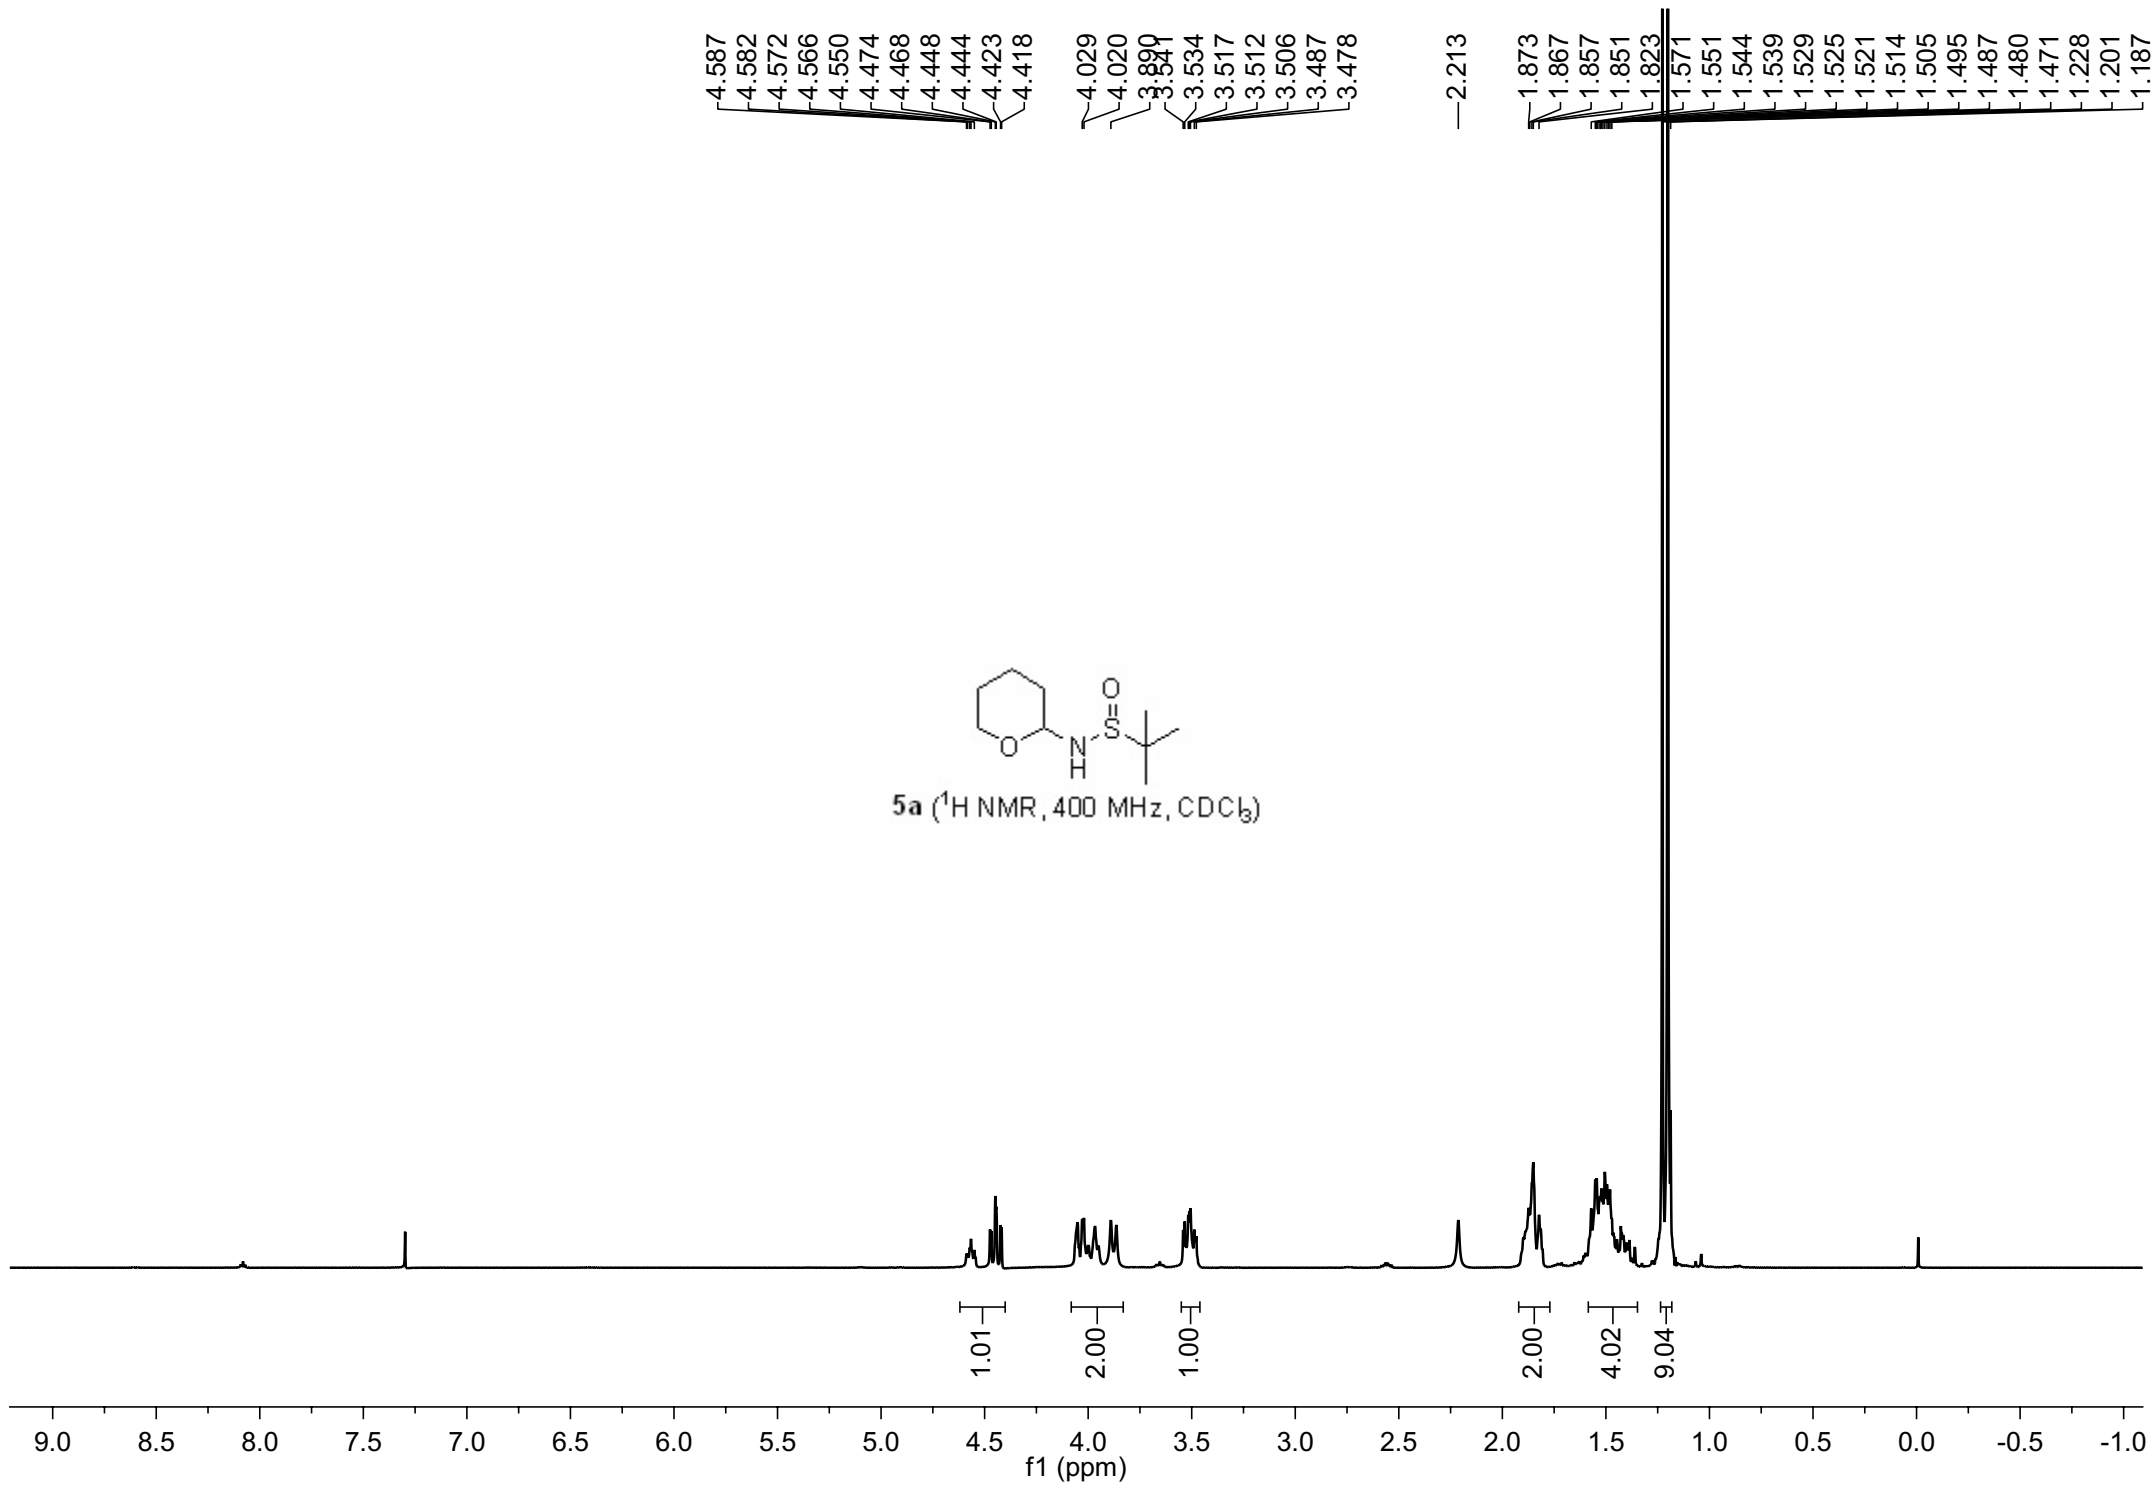



86.193  
84.885

66.924  
66.770

55.862  
55.743

33.047  
32.511  
24.968  
24.900  
22.948  
22.868  
22.529  
22.450

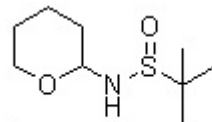

5a (<sup>13</sup>C {<sup>1</sup>H} NMR, 100 MHz, CDCl<sub>3</sub>)

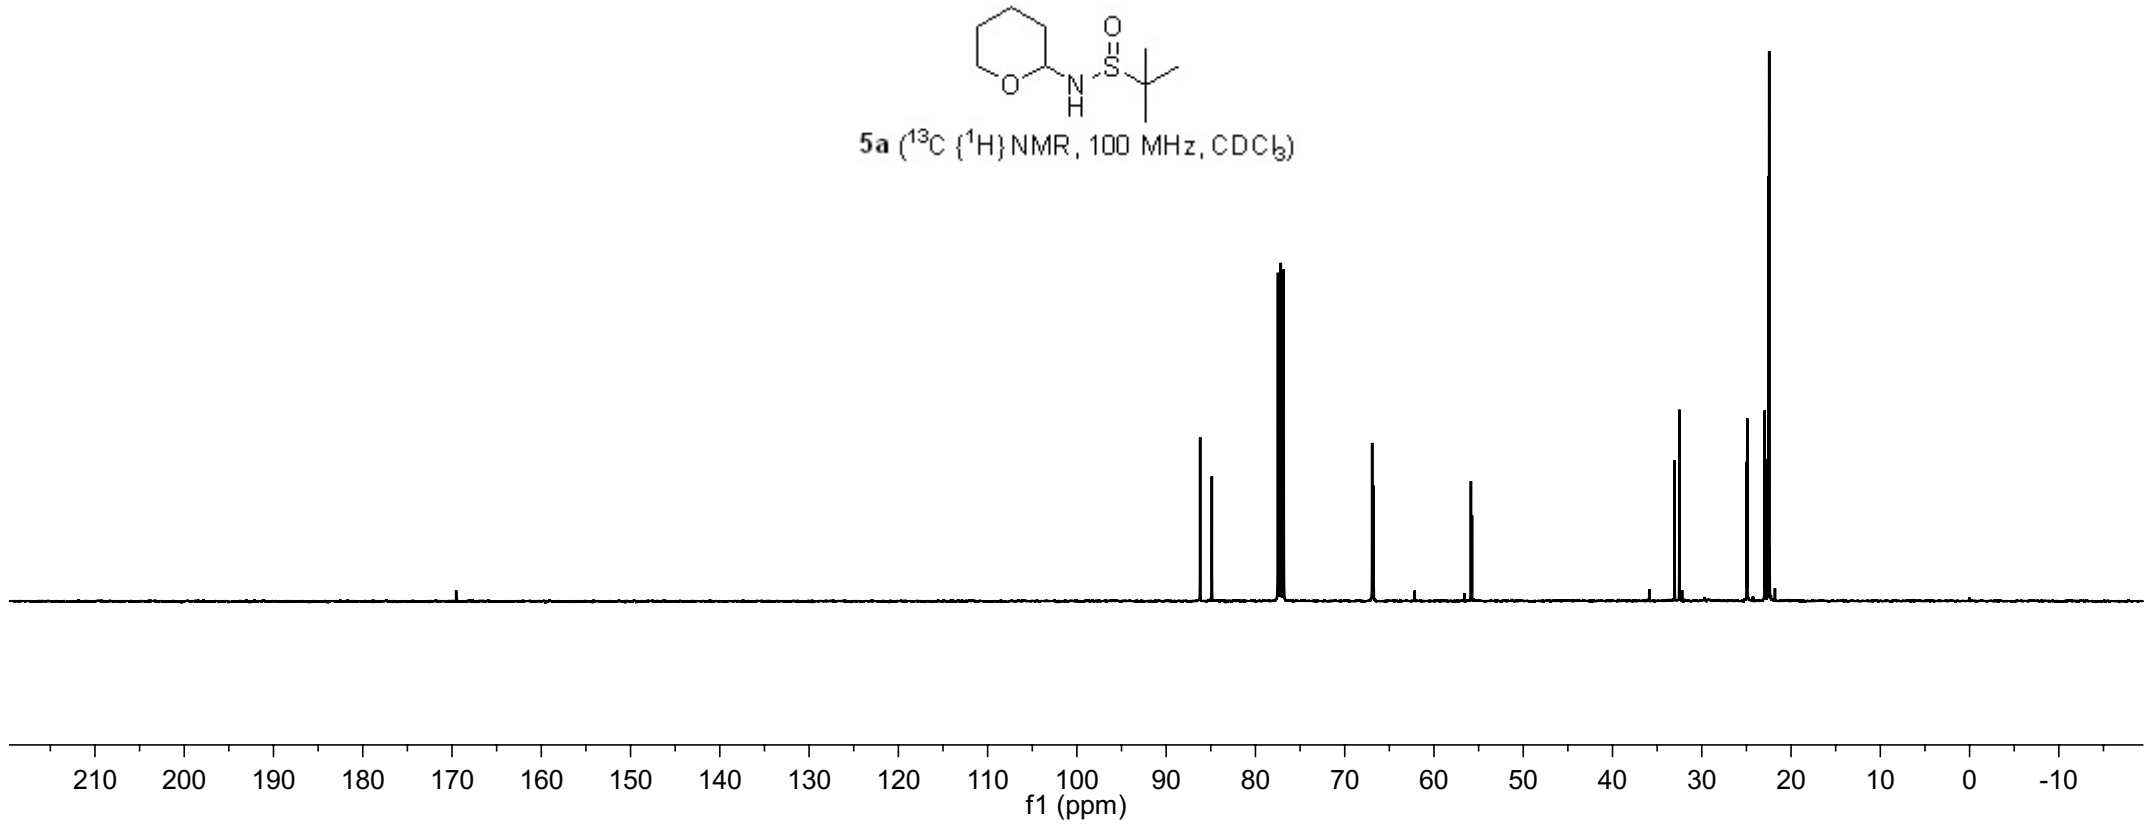

7.882  
7.859

4.392  
4.386  
4.369  
4.363  
4.346  
4.340  
3.849  
3.844  
3.829  
3.809  
3.401  
3.382  
3.374  
3.354  
3.346

1.795  
1.792  
1.681  
1.675  
1.661  
1.652  
1.644  
1.637  
1.540  
1.531  
1.512  
1.507  
1.496  
1.487  
1.471  
1.462  
1.434  
1.416  
1.393  
1.385  
1.376  
1.361  
1.350  
1.343  
1.277

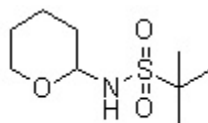

7a (<sup>1</sup>H NMR, 400 MHz, DMSO-d<sub>6</sub>)

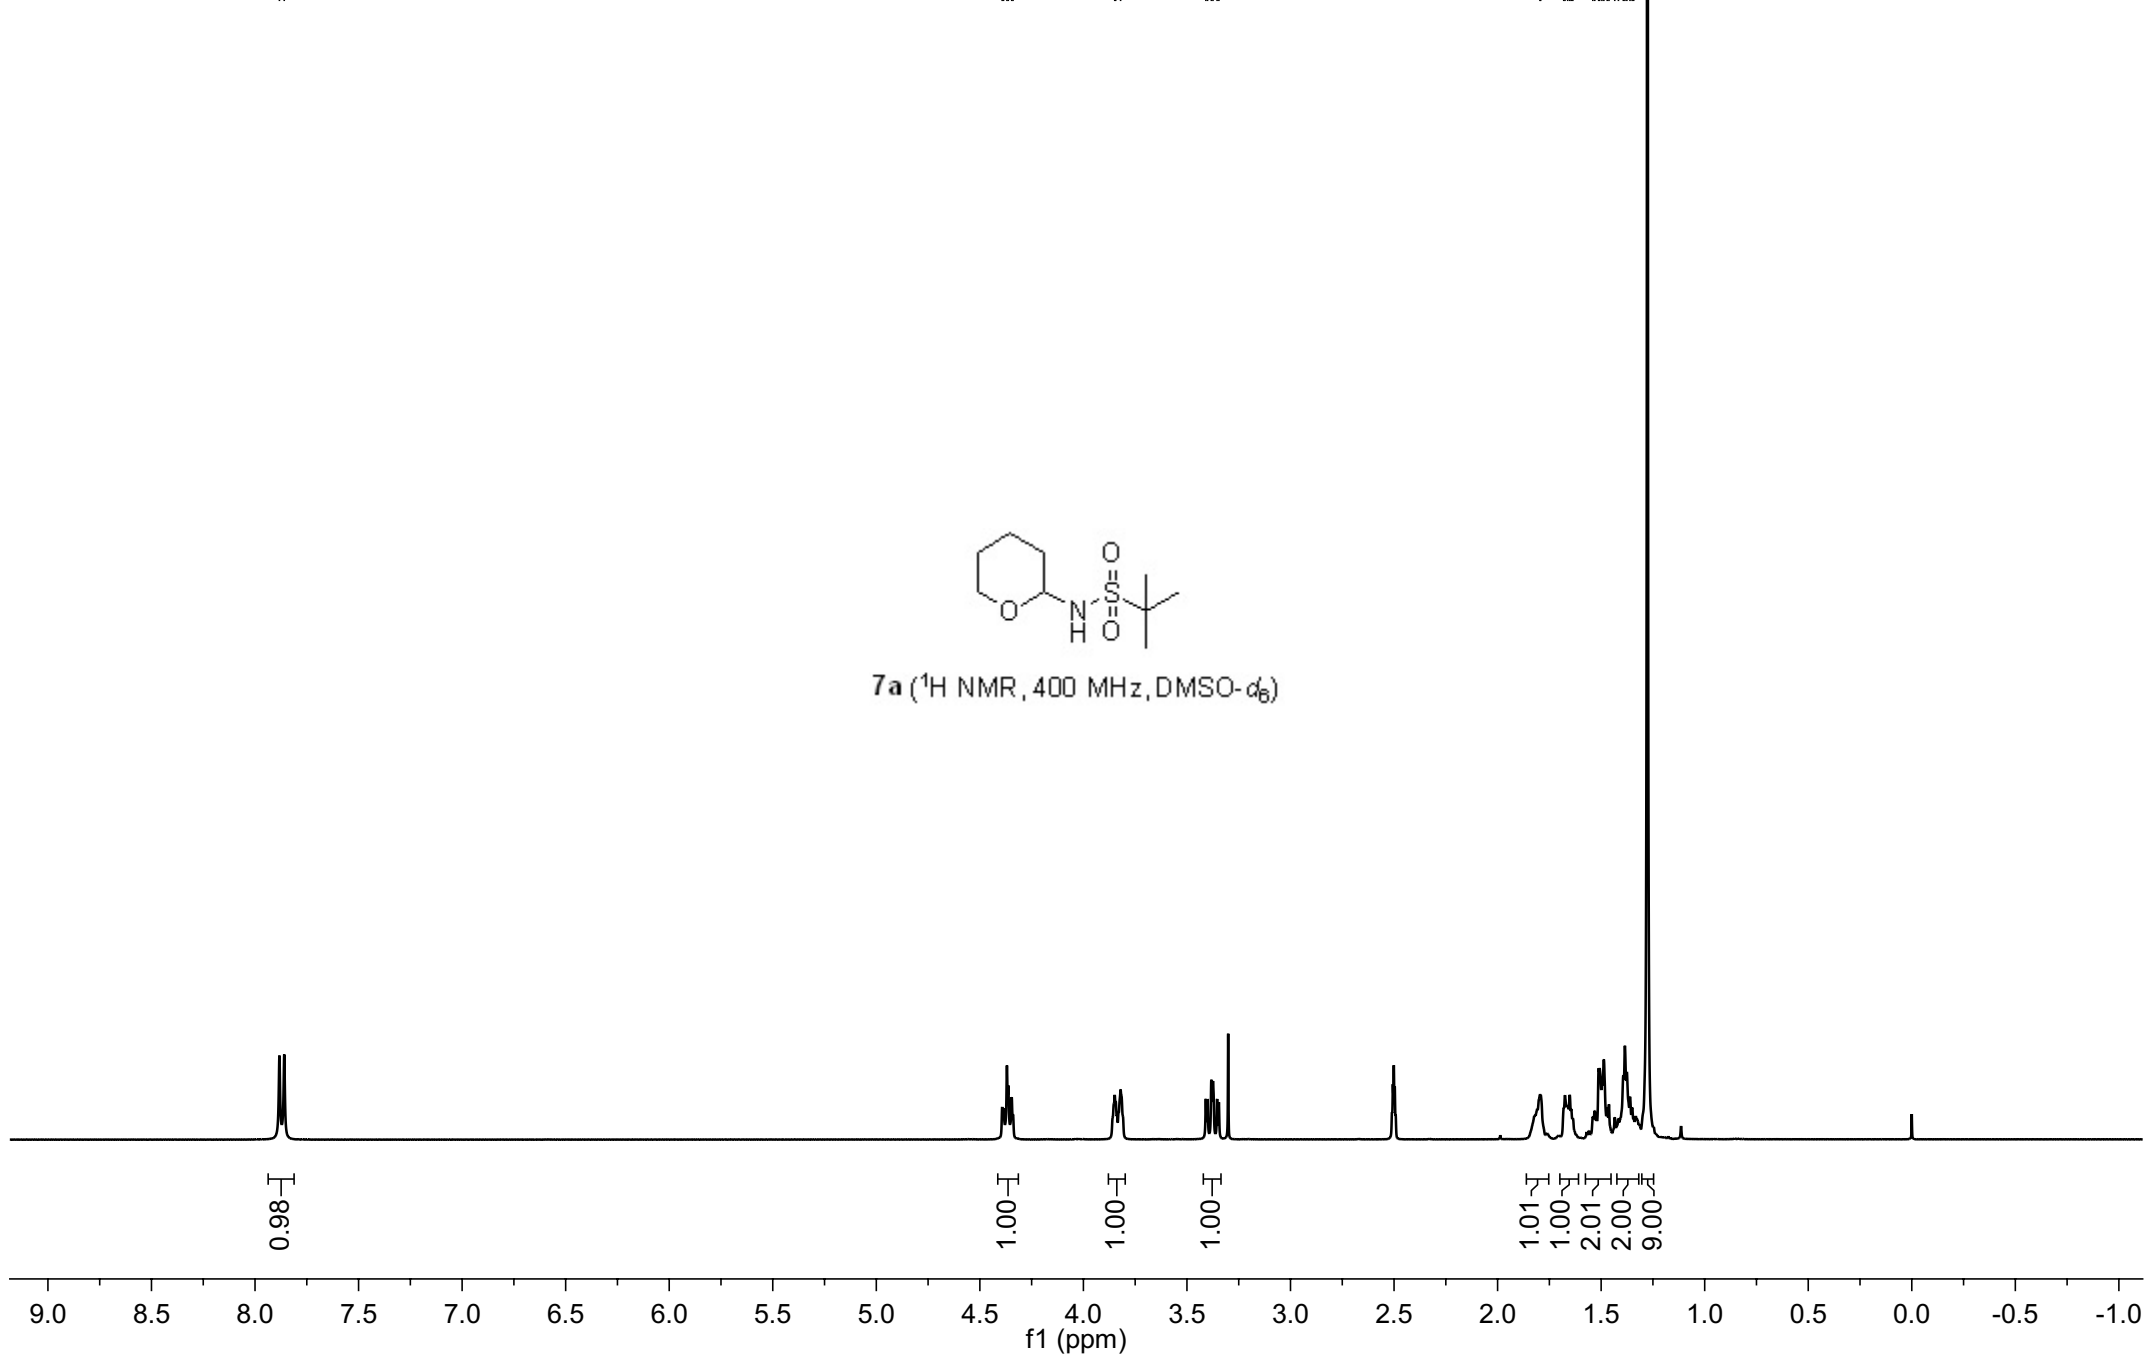

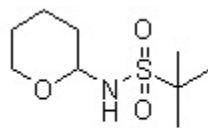

7a ( $^{13}\text{C}$  { $^1\text{H}$ } NMR, 100 MHz, DMSO- $d_6$ )

—81.698

—65.771

—58.161

—31.801

—24.550

—23.719

—22.422

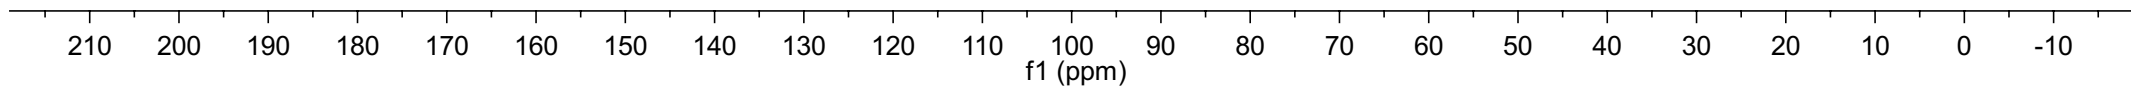

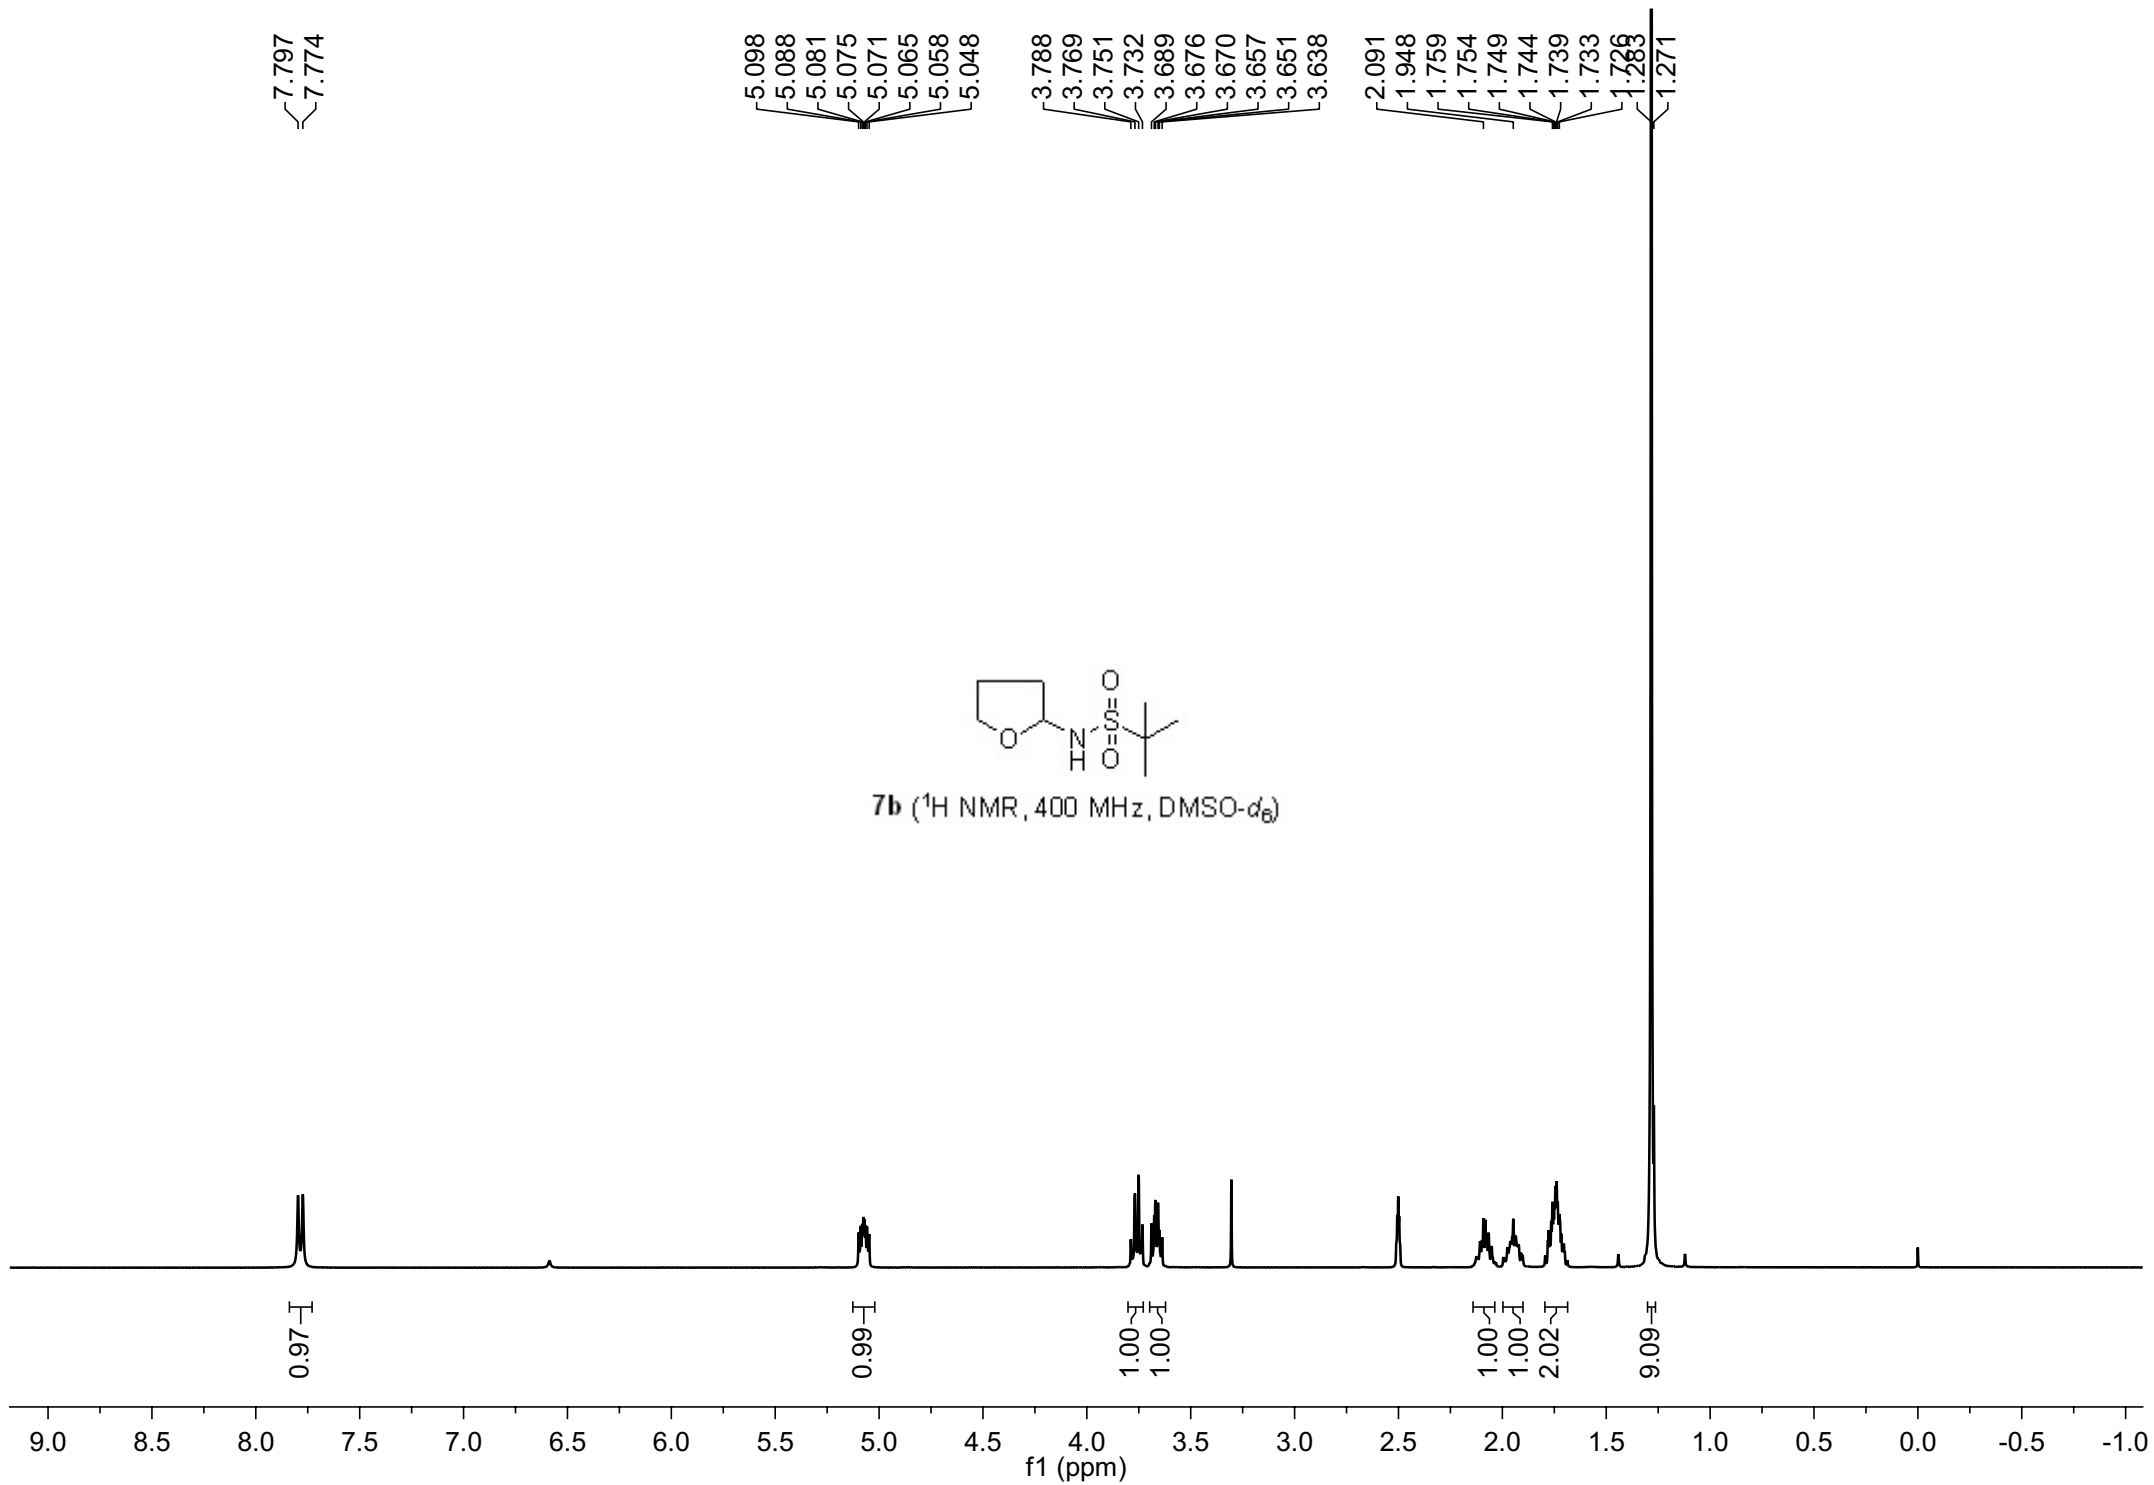

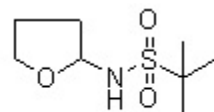

**7b** ( $^{13}\text{C}$  { $^1\text{H}$ } NMR, 100 MHz,  $\text{DMSO-}d_6$ )

—84.497

—66.012

—57.992

—31.694

—24.035

—23.774

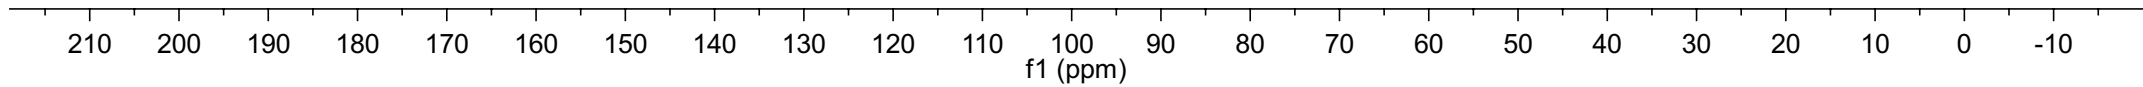

7.240  
7.224  
7.206  
7.188  
7.173  
7.142  
7.124  
7.107  
7.086  
7.066  
7.039  
7.020  
7.004  
6.990  
6.970

3.925  
3.906  
3.887  
3.426  
3.411  
3.401

2.285  
2.055  
2.038  
2.022  
2.006  
1.985  
1.965  
1.947  
1.930  
1.913  
1.897  
1.419  
1.404  
1.363  
1.348  
1.328  
1.312  
1.293  
1.272  
1.254  
1.235  
1.217  
1.072

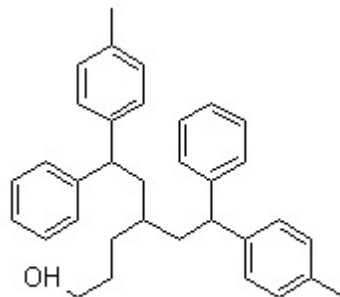

9 (<sup>1</sup>H NMR, 400 MHz, CDCl<sub>3</sub>)

4.03  
6.00  
7.93

2.00  
2.00

6.04  
4.02

2.00  
2.00  
1.17  
0.91

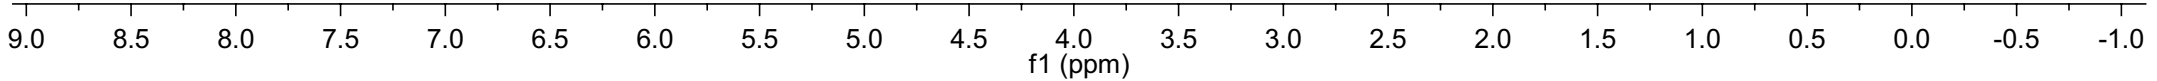

145.351  
145.052  
145.028  
142.122  
141.869  
141.836  
135.498  
129.099  
128.385  
128.367  
127.878  
127.797  
127.771  
125.971

—63.036

—48.172

40.575  
40.511

32.095  
29.263  
28.991  
28.995

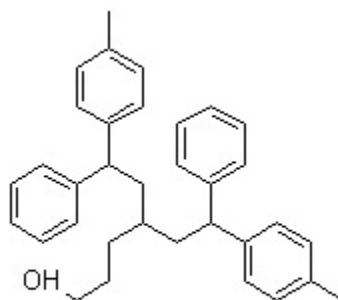

9 (<sup>13</sup>C {<sup>1</sup>H} NMR, 100 MHz, CDCl<sub>3</sub>)

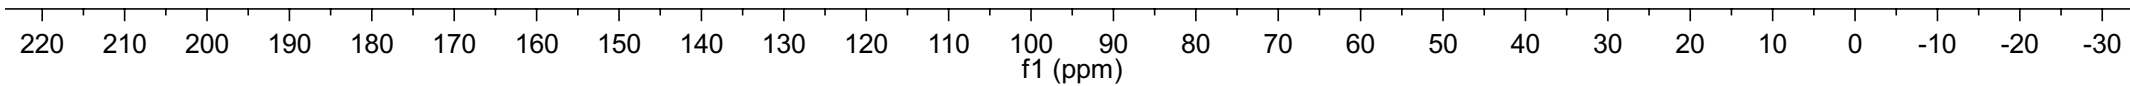

# Single Injection Report

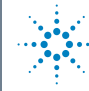

Agilent Technologies

Data file: FD\_HPLC\_012-2021-01-07 19-16-03+08-00. dx  
Inj. volume: 5.000  
Sequence Name: Single Sample  
Sample name: 6aj  
Instrument: FD\_HPLC\_012  
Processing method: Method 1. pmx  
Location: P1-A3

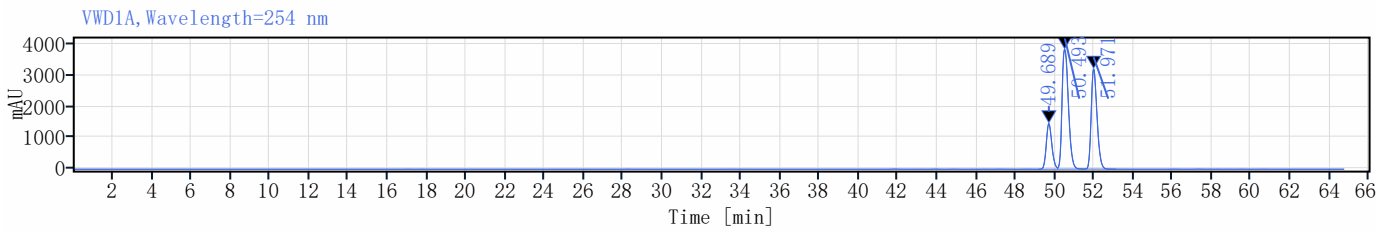

Signal: VWD1A, Wavelength=254 nm

| RT[min] | Type | Width[min] | Area      | Height  | Area% |
|---------|------|------------|-----------|---------|-------|
| 49.689  | BV   | 0.98       | 28955.91  | 1465.71 | 15.93 |
| 50.493  | VB   | 1.38       | 86601.74  | 3838.79 | 47.64 |
| 51.971  | BB   | 1.61       | 66217.99  | 3212.39 | 36.43 |
|         | Sum  |            | 181775.64 |         |       |



# Single Injection Report



Agilent Technologies

Data file: FD\_HPLC\_010-2021-01-11 16-20-53+08-00. dx  
Inj. volume: 2.000  
Sequence Name: Single Sample  
Sample name: 6ak  
Instrument: FD\_HPLC\_010  
Processing method: Method 1. pmx  
Location: P1-A1

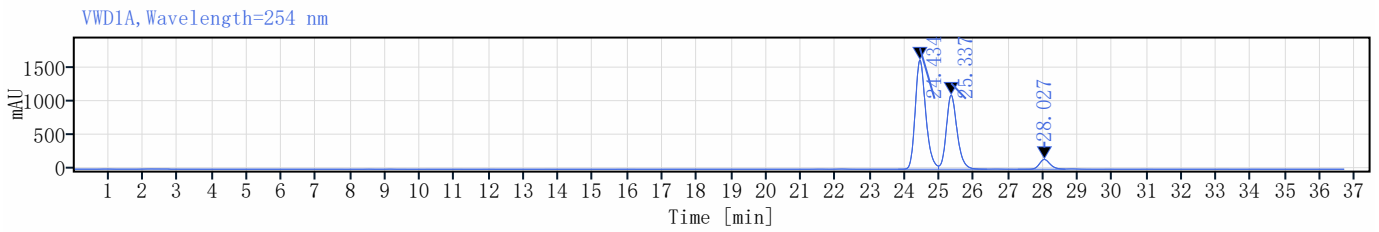

Signal: VWD1A, Wavelength=254 nm

| RT[min] | Type | Width[min] | Area     | Height  | Area% |
|---------|------|------------|----------|---------|-------|
| 24.434  | BV   | 1.16       | 34085.54 | 1619.52 | 55.79 |
| 25.337  | VV   | 1.40       | 23881.28 | 1099.14 | 39.09 |
| 28.027  | BV   | 1.37       | 3124.86  | 144.43  | 5.12  |
|         | Sum  |            | 61091.68 |         |       |

# Single Injection Report



Agilent Technologies

Data file: FD\_HPLC\_012-2021-01-08 12-34-18+08-00. dx  
Inj. volume: 5.000  
Sequence Name: Single Sample  
Sample name: 6a1  
Instrument: FD\_HPLC\_012  
Processing method: Method 1. pmx  
Location: P1-A7

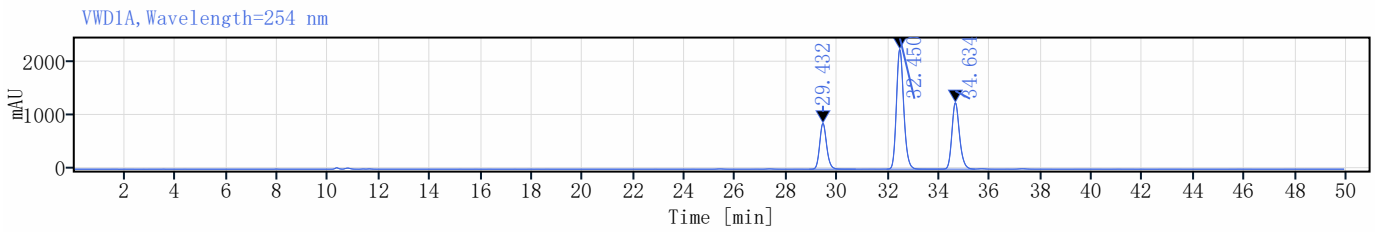

Signal: VWD1A, Wavelength=254 nm

| RT[min] | Type | Width[min] | Area     | Height  | Area% |
|---------|------|------------|----------|---------|-------|
| 29.432  | BB   | 1.83       | 16058.57 | 847.26  | 18.76 |
| 32.450  | VB   | 1.99       | 43979.51 | 2221.47 | 51.38 |
| 34.634  | BV   | 1.48       | 25550.45 | 1230.71 | 29.85 |
|         | Sum  |            | 85588.53 |         |       |

# Single Injection Report



Agilent Technologies

Data file: FD\_HPLC\_010-2021-01-11 17-39-47+08-00. dx  
Inj. volume: 2.000  
Sequence Name: Single Sample  
Sample name: 8bh  
Instrument: FD\_HPLC\_010  
Processing method: Method 1. pmx  
Location: P1-A3

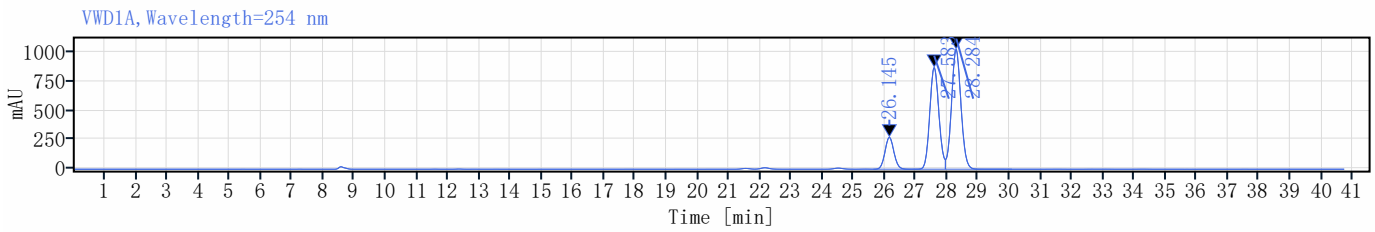

Signal: VWD1A, Wavelength=254 nm

| RT[min] | Type | Width[min] | Area     | Height  | Area% |
|---------|------|------------|----------|---------|-------|
| 26.145  | VB   | 1.21       | 5418.12  | 270.91  | 12.14 |
| 27.583  | BV   | 1.10       | 17684.43 | 865.86  | 39.62 |
| 28.284  | VB   | 2.13       | 21536.93 | 1020.37 | 48.25 |
|         | Sum  |            | 44639.48 |         |       |

# Single Injection Report



Agilent Technologies

Data file: FD\_HPLC\_010-2021-01-11 20-02-28+08-00. dx  
Inj. volume: 5.000  
Sequence Name: Single Sample  
Sample name: 8bi  
Instrument: FD\_HPLC\_010  
Processing method: Method 1. pmx  
Location: P1-A5

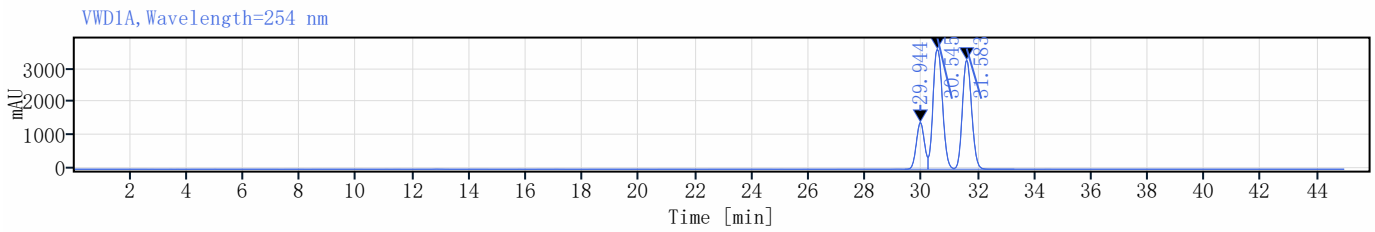

Signal: VWD1A, Wavelength=254 nm

| RT[min] | Type | Width[min] | Area      | Height  | Area% |
|---------|------|------------|-----------|---------|-------|
| 29.944  | BV   | 0.82       | 27946.27  | 1397.99 | 15.01 |
| 30.545  | VV   | 0.91       | 83885.05  | 3591.13 | 45.06 |
| 31.583  | VB   | 2.14       | 74342.66  | 3264.77 | 39.93 |
|         | Sum  |            | 186173.98 |         |       |

# Single Injection Report



Agilent Technologies

Data file: FD\_HPLC\_012-2021-01-07 18-12-28+08-00. dx  
Inj. volume: 5.000  
Sequence Name: Single Sample  
Sample name: 8bj  
Instrument: FD\_HPLC\_012  
Processing method: Method 1. pmx  
Location: P1-A2

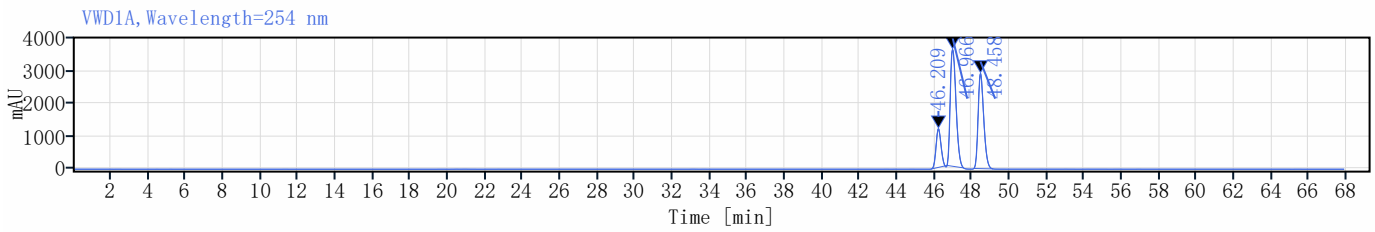

Signal: VWD1A, Wavelength=254 nm

| RT[min] | Type | Width[min] | Area      | Height  | Area% |
|---------|------|------------|-----------|---------|-------|
| 46.209  | MM m | 0.83       | 21618.30  | 1189.40 | 13.57 |
| 46.966  | MM m | 0.88       | 76876.80  | 3589.03 | 48.25 |
| 48.458  | MM m | 1.02       | 60833.05  | 2927.07 | 38.18 |
|         |      | Sum        | 159328.15 |         |       |

# Single Injection Report

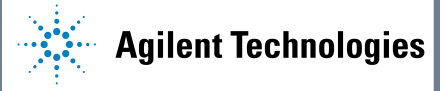

Data file: FD\_HPLC\_010-2021-01-11 16-58-59+08-00. dx  
Inj. volume: 0.700  
Sequence Name: Single Sample  
Sample name: 8bk  
Instrument: FD\_HPLC\_010  
Processing method: Method 1. pmx  
Location: P1-A2

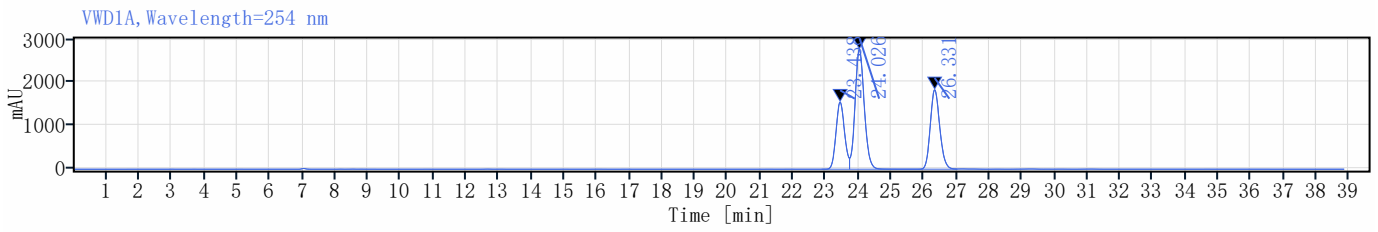

Signal: VWD1A, Wavelength=254 nm

| RT[min] | Type | Width[min] | Area      | Height  | Area% |
|---------|------|------------|-----------|---------|-------|
| 23.438  | BV   | 0.85       | 28179.94  | 1552.03 | 23.59 |
| 24.026  | VB   | 2.03       | 54345.32  | 2769.35 | 45.49 |
| 26.331  | BV   | 1.26       | 36942.33  | 1836.68 | 30.92 |
|         | Sum  |            | 119467.59 |         |       |

# Single Injection Report



Agilent Technologies

Data file: FD\_HPLC\_010-2021-01-11 21-25-40+08-00. dx  
Inj. volume: 5.000  
Sequence Name: Single Sample  
Sample name: 6ah  
Instrument: FD\_HPLC\_010  
Processing method: Method 1. pmx  
Location: P1-A6

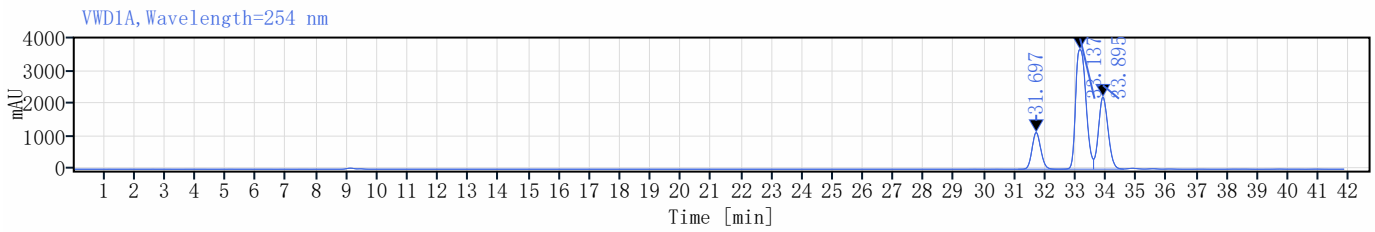

Signal: VWD1A, Wavelength=254 nm

| RT[min] | Type | Width[min] | Area      | Height  | Area% |
|---------|------|------------|-----------|---------|-------|
| 31.697  | BB   | 1.33       | 22689.41  | 1129.91 | 14.29 |
| 33.137  | BV   | 1.15       | 87256.84  | 3683.78 | 54.96 |
| 33.895  | VV   | 0.99       | 48817.07  | 2217.64 | 30.75 |
|         | Sum  |            | 158763.32 |         |       |

# Single Injection Report



Agilent Technologies

Data file: FD\_HPLC\_010-2021-01-11 19-15-20+08-00. dx  
Inj. volume: 5.000  
Sequence Name: Single Sample  
Sample name: 6ai  
Instrument: FD\_HPLC\_010  
Processing method: Method 1. pmx  
Location: P1-A4

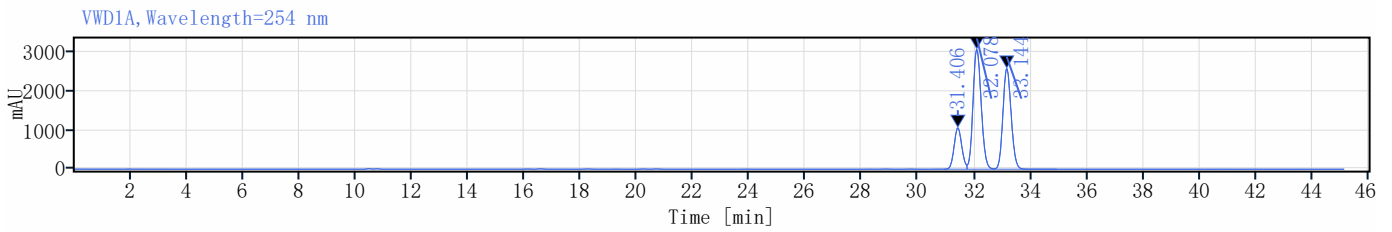

Signal: VWD1A, Wavelength=254 nm

| RT[min] | Type | Width[min] | Area      | Height  | Area% |
|---------|------|------------|-----------|---------|-------|
| 31.406  | BV   | 0.83       | 20310.43  | 1067.21 | 14.90 |
| 32.078  | VV   | 0.96       | 63020.27  | 3095.30 | 46.25 |
| 33.144  | VB   | 2.23       | 52938.48  | 2601.55 | 38.85 |
|         | Sum  |            | 136269.18 |         |       |
